# Supplementary material for: Diagnostic Category Prevalence in 3 Classification Systems Across the Transition to the International Classification of Diseases, Tenth Revision, Clinical Modification
Source: PubMed Central journal article supplement (PMC7142382; doi:10.1001/jamanetworkopen.2020.2280), 2020-04-08
Supplement: jamanetwopen-3-e202280-s001.pdf [file jamanetwopen-3-e202280-s001.pdf]

## Supplementary Online Content

Ellis RP, Hsu HE, Song C, et al. Diagnostic category prevalence in 3 classification systems across the transition to the *International Classification of Diseases, Tenth Revision, Clinical Modification*. *JAMA Netw Open*. 2020;3(4):e202280. doi:10.1001/jamanetworkopen.2020.2280

**eAppendix.** Statistical Overview

**eFigure 1.** Monthly Plots of Selected Population Characteristics

**eFigure 2.** Cardiac Chapter for World Health Organization

**eFigure 3.** Selected Other Diagnostic Categories for Pregnancy Conditions in World Health Organization, Health and Human Services Hierarchical Condition Categories, and Agency for Healthcare Research and Quality Clinical Classification System With Only Small Changes Associated With October 2015

**eTable 1.** Piecewise Linear Regression Coefficients Predicting 2010 to 2017 Monthly Prevalence for 19 WHO Chapters

**eTable 2.** Piecewise Linear Regression Coefficients Predicting 2010 to 2017 Monthly Prevalence for 127 Health and Human Services Hierarchical Condition Categories

**eTable 3.** Piecewise Linear Regression Coefficients Predicting 2010 to 2017 Monthly Prevalence for 282 Agency for Healthcare Research and Quality Clinical Classification System Categories

This supplementary material has been provided by the authors to give readers additional information about their work.

## eAppendix. Statistical Overview

This appendix contains details about the piecewise linear regression specification. Three additional appendices present full results for all three classification systems.

*Outcome variable:* We started by counting the number of eligible individuals with at least one diagnosis in a classification category in each month and dividing this sum by the number of people eligible in that month. This monthly category prevalence rate was expressed as a rate per 10,000. Because months vary in their number of days, each raw monthly rate was standardized by dividing by the number of days in the month and multiplying by 30.437, the average number of days per month over the study period. Regressions were conducted using outcomes in levels, before normalization.

### *Model Specification*

We estimated piecewise linear models of the form:

$$Outcome = \alpha + \beta t + \gamma D_{ICD10} + \delta D_{ICD10}(t - 70) + \sum_{m=2}^{12} \mu_m * D_m + \varepsilon_t$$

Where:

$t$  = time in months from January 2010, ranging from 1 to 96,

$D_{ICD10}$  = 1 if  $t \geq 70$ , else 0, (since October 2015 = month 70),

$m$  = index 1 – 12 of calendar months,

$D_m$  = monthly dummy variables to pick up monthly seasonality,

$\alpha, \beta, \gamma, \delta, \mu_m$  are parameters to be estimated, and

$\varepsilon_t$  is a monthly error term.

In order to facilitate the interpretation of results as percentage changes, we normalized all regression coefficients and their standard errors by dividing them by the adjusted average rate in September 2015, the final month before the introduction of ICD-10-CM. This enabled us to interpret all model parameters in terms of percentage changes from September 2015. The term  $\alpha$  is the predicted pre-sample (month 0) rate (as a percent of the September 2015 rate);  $\beta$  is the incremental percent change for each month before ICD-10-CM; and  $\gamma$  is the percent change that occurred between and September to October 2015, which we call the “level change in October 2015”. Because we started

the time trend at month 70 and divided by 26, the number of months observed post ICD-10, the  $\delta$  coefficient captures the percentage “time trend effect” that occurred during the 26 months following ICD-10-CM. Not estimated directly by the specification but easily calculated is  $\gamma + \delta * 26$  which is the “cumulative effect of the level and trend change” from ICD10 to the end of our sample. These parameters and their standard errors are presented in each appendix table for all diagnostic categories.

Standard errors from the regression (and the linear combination showing the cumulative effect) were used to calculate p-values and confidence intervals for each parameter. Because we conducted separate tests for each of the several disease categories in each classification system, we used the Bonferroni correction to avoid identifying too many changes that could be due to chance alone. Given the N= 19, 127 and 282 categories for WHO, HHS-HCC and AHRQ-CCS, respectively the p-values that we interpreted as significant at the 5% level are .0027, .0004 and .00017 for the three classification systems; analogously, we used the following two sided t-statistic multiples of the standard error to calculate confidence intervals: -3.104, -3.698, and -3.931 for WHO, HHS, and CCS systems, respectively.

**eFigure 1.** Monthly Plots of Selected Population Characteristics

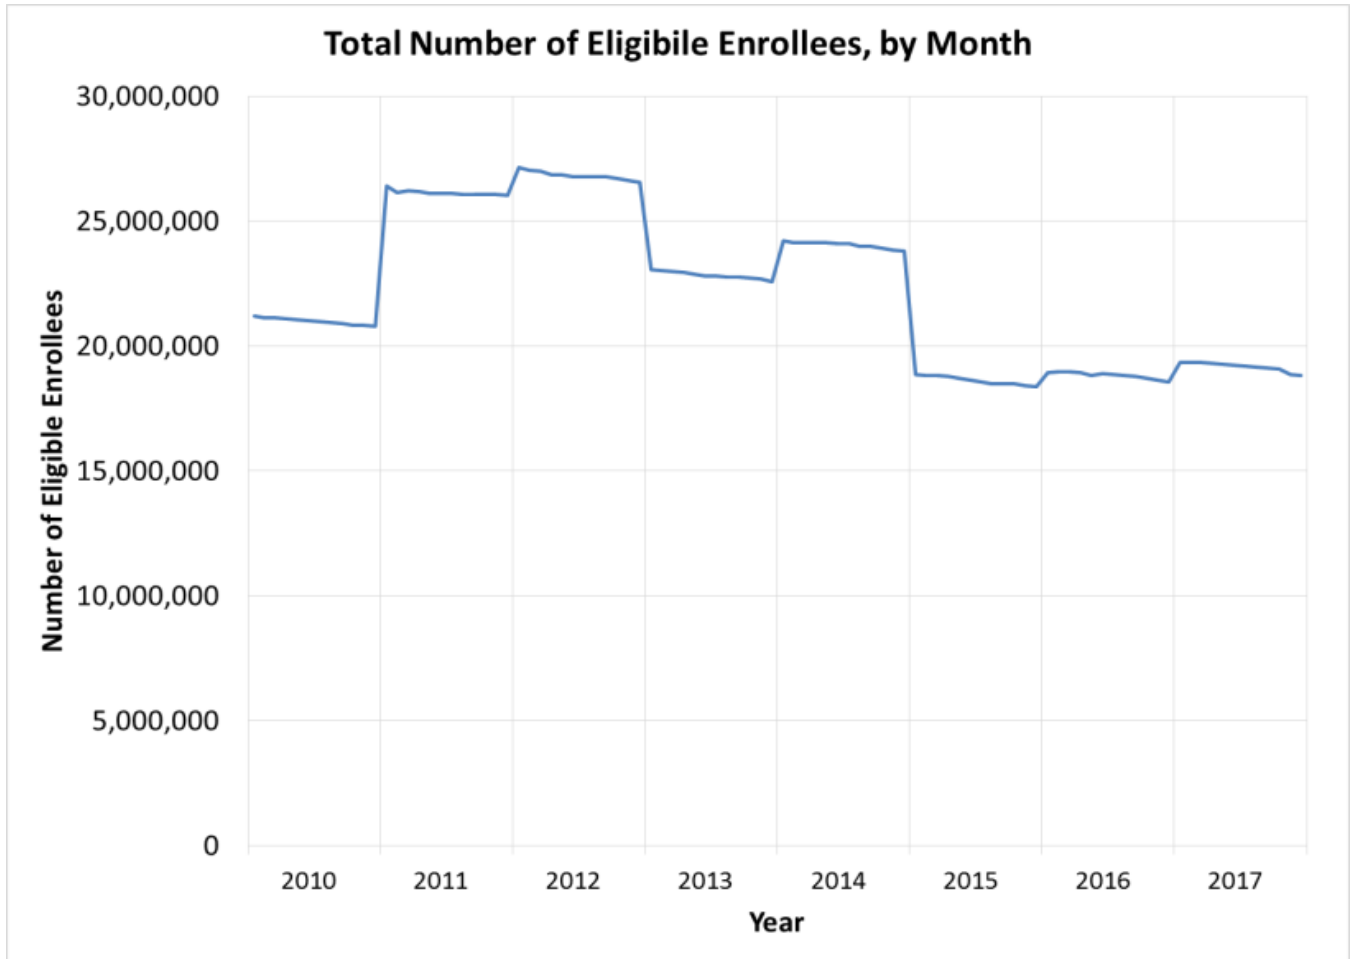

### Average Age of Eligible Enrollees by Month

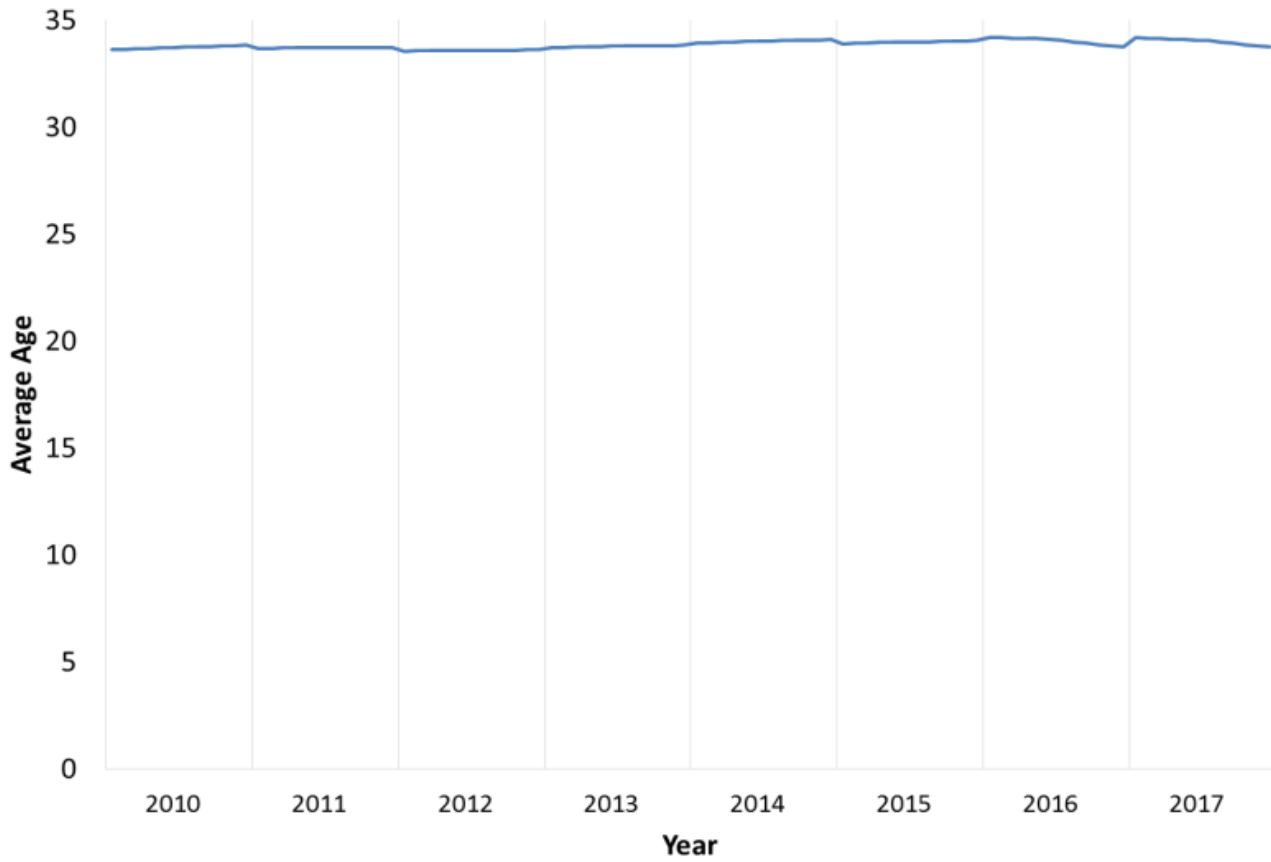

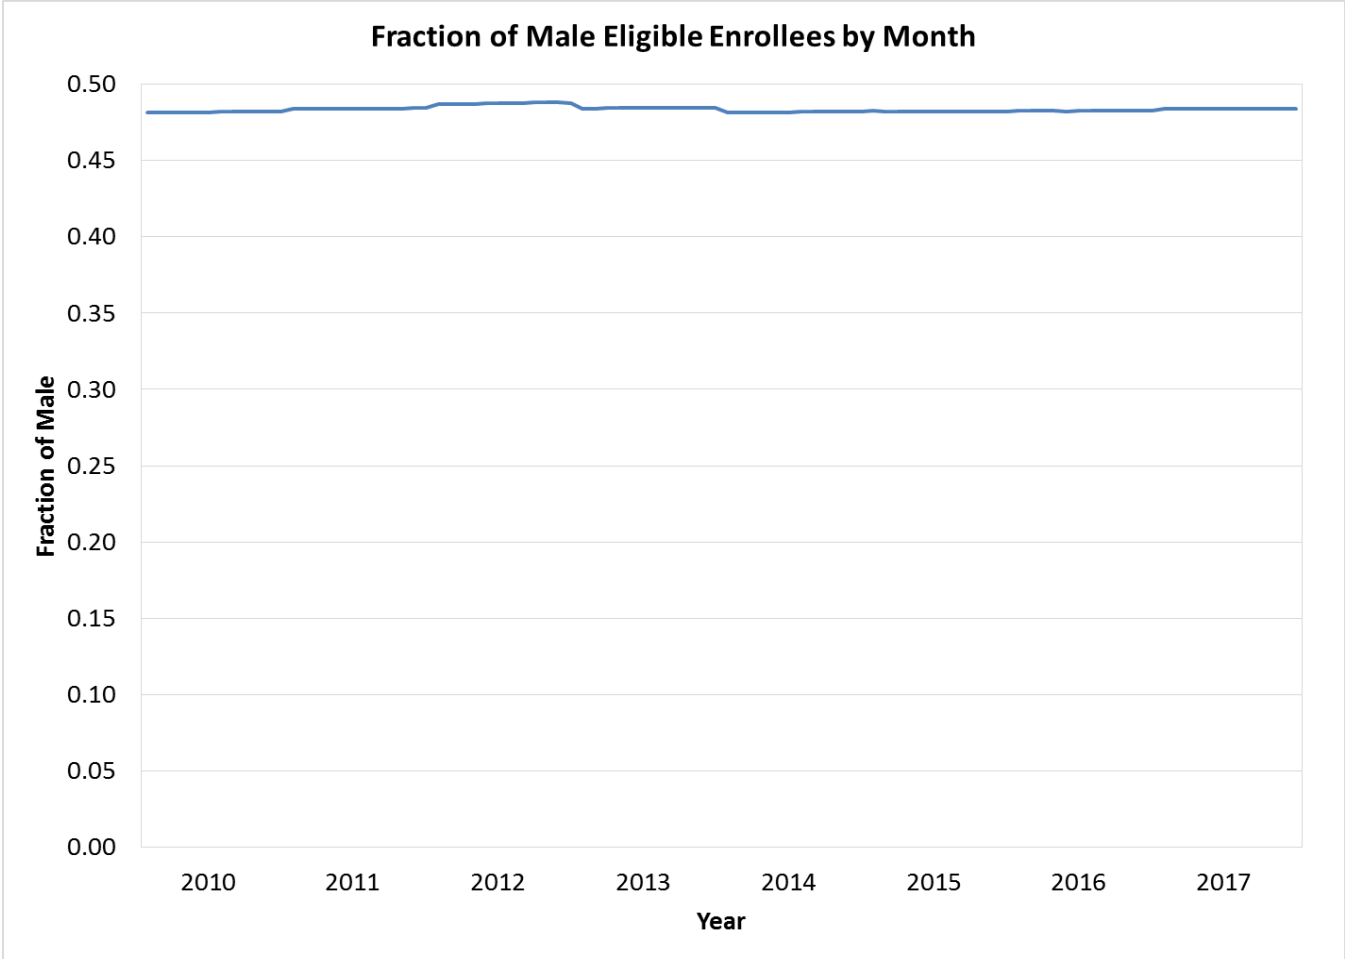

**Fraction of Eligible Enrollees in PPO Plans by Month**

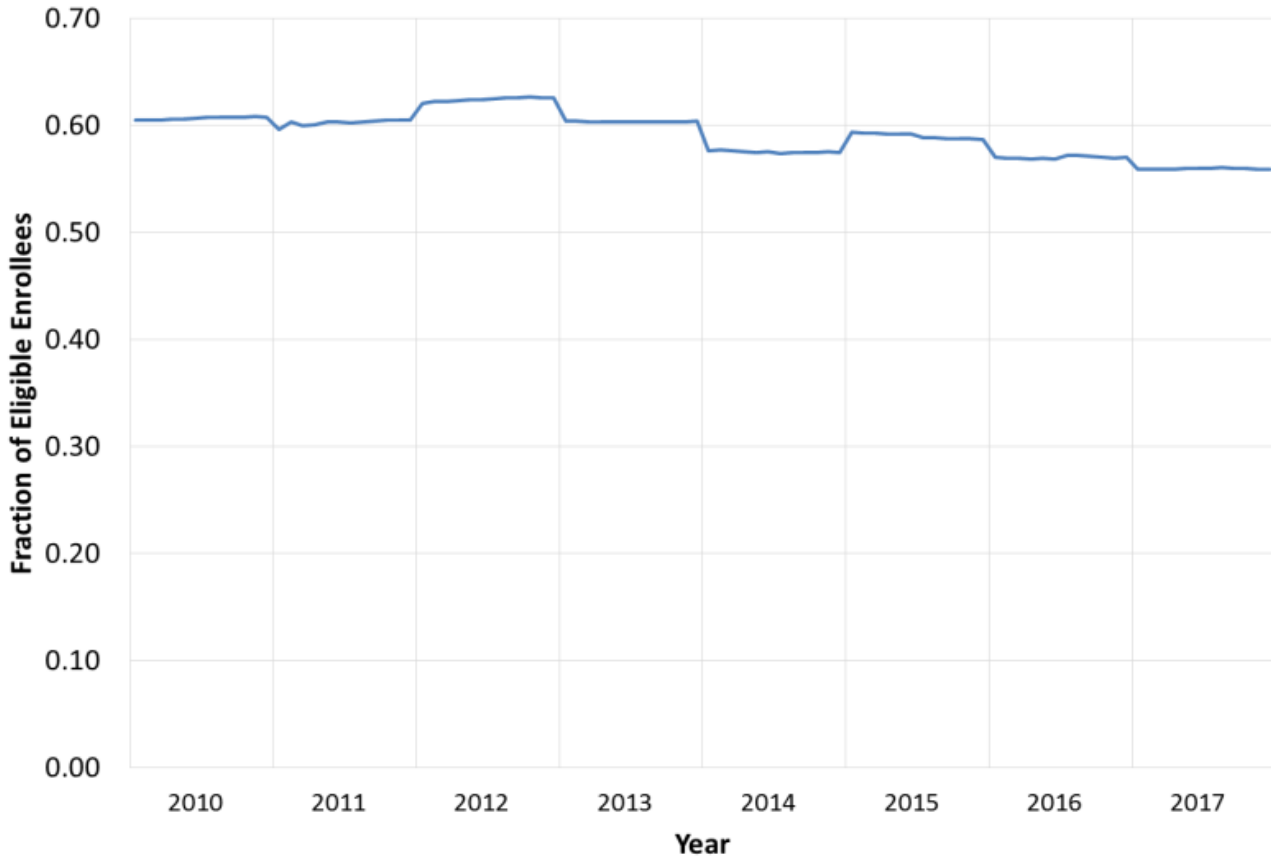

**Fraction of Eligible Enrollees Located in California**

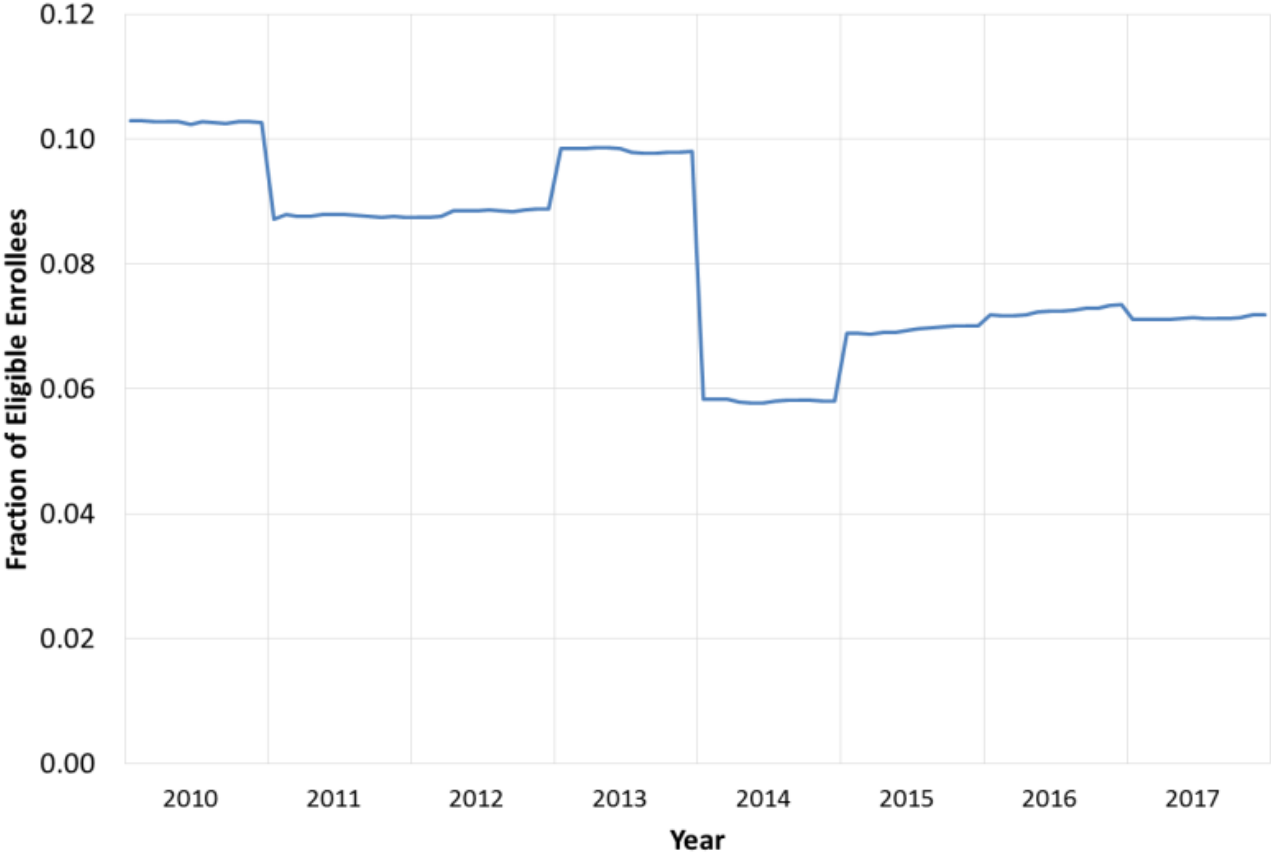



eFigure 2 Cardiac Chapter for World Health Organization

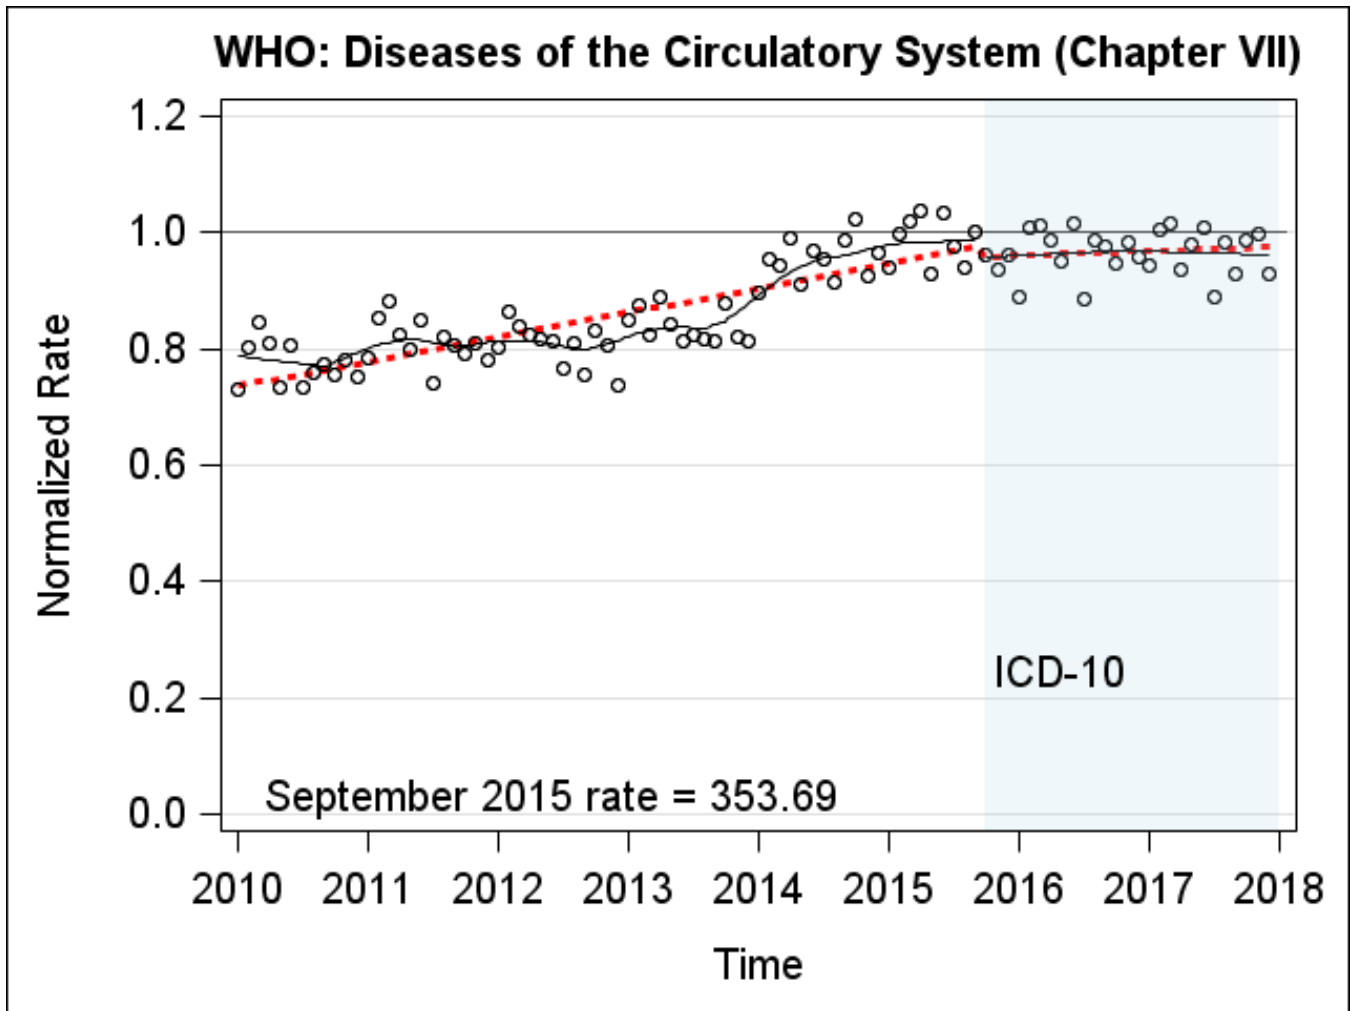

**Notes:** The diagnostic category prevalence rate per 10,000 enrollees in September 2015 is shown in the lower left corner of each panel. The “normalized rate” (plotted as o) is the rate of enrollees with at least one diagnosis in a diagnostic category divided by the September 2015 rate. Both  $\cdots$  and  $—$  are curves fitted with a discontinuity at October 2015:  $\cdots$  using a piecewise linear model and  $—$  using a LOESS smoothing algorithm.

**eFigure 3** Selected Other Diagnostic Categories for Pregnancy Conditions in World Health Organization, Health and Human Services Hierarchical Condition Categories, and Agency for Healthcare Research and Quality Clinical Classification System With Only Small Changes Associated With October 2015

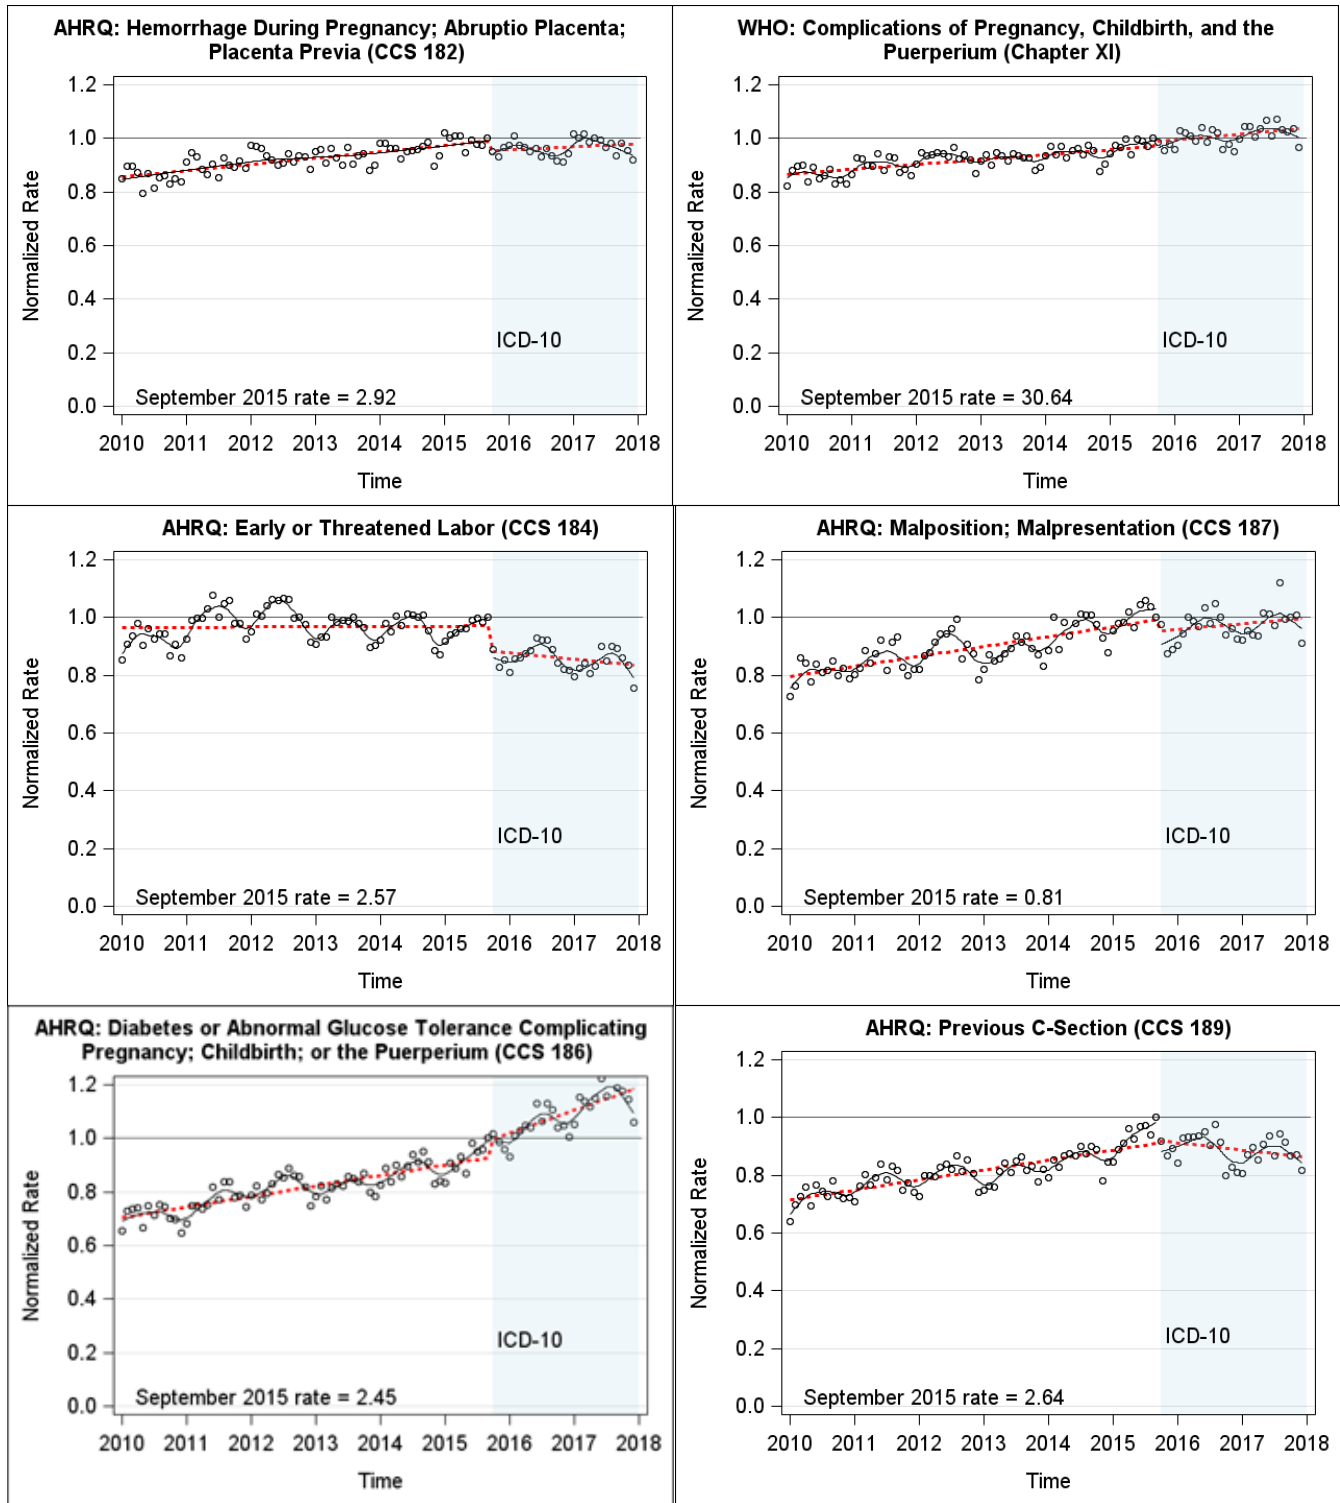

**Notes:** The diagnostic category prevalence rate per 10,000 enrollees in September 2015 is shown in the lower left corner of each panel. The “normalized rate” (plotted as o) is the rate of enrollees with at least one diagnosis in a diagnostic category divided by the September 2015 rate. Both  $\cdots$  and  $—$  are curves fitted with a discontinuity at October 2015:  $\cdots$  using a piecewise linear model and  $—$  using a LOESS smoothing algorithm.

**eTable 1. Piecewise Linear Regression Coefficients Predicting 2010 to 2017 Monthly Prevalence for 19 WHO Chapters**

Gray-shaded regions are statistically significant; darker (blue) shaded areas are statistically significant and large, that is, |coefficient| ≥ 0.2. 95% Confidence intervals (CI) and statistical significance calculated using the Bonferroni correction.

|                     |                                                                       | Sept 2015 prevalence per 10,000 enrollees | Intercept: Estimated relative rate in Dec 2009 (CI) | Slope: Estimated trend rate before ICD-10 (CI) | Level change in October 2015 (CI) | Time trend change Oct 2015 – Dec 2017 (CI) | Cumulative effect of level and time trend changes (CI) | F-test: For a straight line trend (p-value) |
|---------------------|-----------------------------------------------------------------------|-------------------------------------------|-----------------------------------------------------|------------------------------------------------|-----------------------------------|--------------------------------------------|--------------------------------------------------------|---------------------------------------------|
| <b>WHO Chapters</b> |                                                                       | <b>9/15 Rate</b>                          | <b><math>\alpha</math></b>                          | <b><math>\beta</math></b>                      | <b><math>\gamma</math></b>        | <b><math>\delta</math></b>                 | <b><math>\gamma + \delta</math></b>                    | <b>F: <math>\gamma = \delta = 0</math></b>  |
| 1                   | Infectious and Parasitic Diseases                                     | 152.97<br>(152.33, 153.61)                | 0.88<br>(0.82, 0.93)                                | 0.003<br>(0.002, 0.003)                        | -0.123<br>(-0.187, -0.06)         | 0.043<br>(-0.05, 0.136)                    | -0.081<br>(-0.156, -0.005)                             | 0.00000                                     |
| 2                   | Neoplasms                                                             | 172.79<br>(172.11, 173.47)                | 0.7<br>(0.65, 0.74)                                 | 0.003<br>(0.002, 0.003)                        | -0.007<br>(-0.055, 0.041)         | -0.014<br>(-0.085, 0.058)                  | -0.021<br>(-0.078, 0.037)                              | 0.56067                                     |
| 3                   | Endocrine, Nutritional and Metabolic Diseases, and Immunity Disorders | 458.18<br>(457.09, 459.27)                | 0.6<br>(0.55, 0.64)                                 | 0.005<br>(0.004, 0.006)                        | 0.007<br>(-0.041, 0.055)          | -0.056<br>(-0.127, 0.015)                  | -0.049<br>(-0.106, 0.009)                              | 0.04678                                     |
| 4                   | Diseases of the Blood and Blood-Forming Organs                        | 55.86<br>(55.47, 56.25)                   | 0.58<br>(0.53, 0.62)                                | 0.005<br>(0.004, 0.006)                        | 0.098<br>(0.049, 0.148)           | -0.014<br>(-0.088, 0.059)                  | 0.084<br>(0.025, 0.143)                                | 0.00000                                     |
| 5                   | Mental Disorders                                                      | 453.21<br>(452.13, 454.29)                | 0.69<br>(0.66, 0.72)                                | 0.004<br>(0.004, 0.0045)                       | -0.069<br>(-0.098, -0.039)        | 0.048<br>(0.004, 0.091)                    | -0.021<br>(-0.056, 0.014)                              | 0.00000                                     |
| 6                   | Diseases of the Nervous System and Sense Organs                       | 413.78<br>(412.74, 414.82)                | 0.83<br>(0.79, 0.87)                                | 0.003<br>(0.002, 0.003)                        | 0.149<br>(0.101, 0.196)           | 0.001<br>(-0.069, 0.071)                   | 0.15<br>(0.093, 0.206)                                 | 0.00000                                     |
| 7                   | Diseases of the Circulatory System                                    | 353.69<br>(352.73, 354.65)                | 0.71<br>(0.67, 0.76)                                | 0.004<br>(0.003, 0.004)                        | -0.019<br>(-0.07, 0.031)          | -0.075<br>(-0.149, -0.001)                 | -0.094<br>(-0.154, -0.034)                             | 0.00010                                     |
| 8                   | Diseases of the Respiratory System                                    | 490.42<br>(489.29, 491.55)                | 1.22<br>(1.14, 1.29)                                | 0.001<br>(0.0001, 0.002)                       | 0.015<br>(-0.068, 0.097)          | -0.005<br>(-0.127, 0.117)                  | 0.01<br>(-0.089, 0.108)                                | 0.85749                                     |
| 9                   | Diseases of the Digestive System                                      | 201.36<br>(200.63, 202.09)                | 0.71<br>(0.67, 0.76)                                | 0.004<br>(0.003, 0.004)                        | 0.056<br>(0.008, 0.104)           | -0.048<br>(-0.119, 0.023)                  | 0.008<br>(-0.049, 0.065)                               | 0.00506                                     |
| 10                  | Diseases of the Genitourinary System                                  | 250.07<br>(249.26, 250.88)                | 0.77<br>(0.73, 0.8)                                 | 0.002<br>(0.002, 0.003)                        | -0.011<br>(-0.054, 0.032)         | -0.065<br>(-0.128, -0.001)                 | -0.076<br>(-0.127, -0.025)                             | 0.00030                                     |
| 11                  | Complications of Pregnancy, Childbirth, and the Puerperium            | 30.64<br>(30.35, 30.93)                   | 0.85<br>(0.82, 0.87)                                | 0.002<br>(0.001, 0.002)                        | 0.016<br>(-0.01, 0.043)           | 0.008<br>(-0.032, 0.047)                   | 0.024<br>(-0.008, 0.056)                               | 0.03350                                     |
| 12                  | Diseases of the Skin and Subcutaneous Tissue                          | 279.92<br>(279.06, 280.78)                | 0.71<br>(0.67, 0.76)                                | 0.003<br>(0.002, 0.003)                        | 0.029<br>(-0.016, 0.074)          | -0.015<br>(-0.081, 0.052)                  | 0.014<br>(-0.039, 0.068)                               | 0.15810                                     |
| 13                  | Diseases of the Musculoskeletal System and Connective Tissue          | 691.57<br>(690.25, 692.89)                | 0.77<br>(0.74, 0.8)                                 | 0.002<br>(0.002, 0.003)                        | 0.013<br>(-0.02, 0.046)           | -0.035<br>(-0.084, 0.013)                  | -0.022<br>(-0.062, 0.017)                              | 0.11976                                     |
| 14                  | Congenital Anomalies                                                  | 31.64<br>(31.35, 31.93)                   | 0.6<br>(0.55, 0.64)                                 | 0.004<br>(0.004, 0.005)                        | -0.058<br>(-0.107, -0.009)        | -0.034<br>(-0.107, 0.038)                  | -0.093<br>(-0.151, -0.034)                             | 0.00000                                     |
| 15                  | Certain Conditions Originating In the Perinatal Period                | 8.63<br>(8.48, 8.78)                      | 0.78<br>(0.74, 0.82)                                | 0.002<br>(0.001, 0.002)                        | 0.024<br>(-0.019, 0.066)          | 0.091<br>(0.028, 0.154)                    | 0.115<br>(0.064, 0.165)                                | 0.00000                                     |
| 16                  | Symptoms, Signs, and Ill-Defined Conditions                           | 653.1<br>(651.81, 654.39)                 | 0.72<br>(0.67, 0.77)                                | 0.005<br>(0.004, 0.005)                        | 0.044<br>(-0.008, 0.096)          | -0.039<br>(-0.116, 0.038)                  | 0.005<br>(-0.057, 0.067)                               | 0.06020                                     |
| 17                  | Injury and Poisoning                                                  | 257.9<br>(257.07, 258.73)                 | 0.81<br>(0.78, 0.84)                                | 0.001<br>(0.0001, 0.0009)                      | -0.096<br>(-0.128, -0.064)        | -0.012<br>(-0.06, 0.035)                   | -0.108<br>(-0.147, -0.07)                              | 0.00000                                     |
| 18                  | Factors Influencing Health Status and Contact with Health Services    | 903.86<br>(902.37, 905.35)                | 0.57<br>(0.54, 0.61)                                | 0.004<br>(0.004, 0.005)                        | 0.040<br>(-0.003, 0.083)          | 0.032<br>(-0.032, 0.096)                   | 0.072<br>(0.02, 0.124)                                 | 0.00009                                     |

|                     |                                                                                                            |                         |                     |                         |                         |                            |                           |                                            |
|---------------------|------------------------------------------------------------------------------------------------------------|-------------------------|---------------------|-------------------------|-------------------------|----------------------------|---------------------------|--------------------------------------------|
| 19                  | External Causes of Injury and Poisoning                                                                    | 36.69<br>(36.37, 37.01) | 0.3<br>(0.23, 0.38) | 0.006<br>(0.005, 0.007) | 0.121<br>(0.039, 0.202) | -0.167<br>(-0.287, -0.047) | -0.046<br>(-0.143, 0.051) | 0.00008                                    |
| <b>WHO Chapters</b> |                                                                                                            | <b>9/15 Rate</b>        | $\alpha$            | $\beta$                 | $\gamma$                | $\delta$                   | $\gamma + \delta$         | <b>F: <math>\gamma = \delta = 0</math></b> |
| ALL                 | # of chapters (out of 19), where coefficients are statistically significant (that is, $P < 0.05/19$ )      |                         | 19                  | 19                      | 8                       | 5                          | 9                         | 11                                         |
| ALL                 | # of chapters with coefficients that are statistically significant and large ( $ \text{coef}  \geq 20\%$ ) |                         | 0                   | 0                       | 0                       | 0                          | 0                         | 0                                          |

**eTable 2.** Piecewise Linear Regression Coefficients Predicting 2010 to 2017 Monthly Prevalence for 127 Health and Human Services Hierarchical Condition Categories

| Gray-shaded regions are statistically significant; darker (blue) shaded areas are statistically significant and large, that is,  coefficient  ≥ 0.2. Confidence intervals (CI) and statistical significance calculated using the Bonferroni correction, corresponding to P<(.05/127)=0.0004 |                                                                                                |                                           |                                                     |                                                |                                   |                                            |                                                        |                                             |
|---------------------------------------------------------------------------------------------------------------------------------------------------------------------------------------------------------------------------------------------------------------------------------------------|------------------------------------------------------------------------------------------------|-------------------------------------------|-----------------------------------------------------|------------------------------------------------|-----------------------------------|--------------------------------------------|--------------------------------------------------------|---------------------------------------------|
|                                                                                                                                                                                                                                                                                             |                                                                                                | Sept 2015 prevalence per 10,000 enrollees | Intercept: Estimated relative rate in Dec 2009 (CI) | Slope: Estimated trend rate before ICD-10 (CI) | Level change in October 2015 (CI) | Time trend change Oct 2015 – Dec 2017 (CI) | Cumulative effect of level and time trend changes (CI) | F-test: For a straight line trend (p-value) |
| HCC                                                                                                                                                                                                                                                                                         | HCC Label                                                                                      | 9/15 Rate                                 | $\alpha$                                            | $\beta$                                        | $\gamma$                          | $\delta$                                   | $\gamma + \delta$                                      | F: $\gamma = \delta = 0$                    |
| 1                                                                                                                                                                                                                                                                                           | HIV/AIDS                                                                                       | 3.75<br>(3.65, 3.85)                      | 0.81<br>(0.75, 0.87)                                | 0.002<br>(0.0012, 0.0029)                      | 0.0337<br>(-0.032, 0.099)         | 0.105<br>(0.01, 0.201)                     | 0.139<br>(0.061, 0.217)                                | 0.00000                                     |
| 2                                                                                                                                                                                                                                                                                           | Septicemia, Sepsis, Systemic Inflammatory Response Syndrome/Shock                              | 2.63<br>(2.55, 2.71)                      | 0.47<br>(0.42, 0.52)                                | 0.0063<br>(0.0055, 0.007)                      | 0.0784<br>(0.021, 0.136)          | -0.104<br>(-0.189, -0.02)                  | -0.026<br>(-0.094, 0.043)                              | 0.00001                                     |
| 3                                                                                                                                                                                                                                                                                           | Central Nervous System Infections, Except Viral Meningitis                                     | 0.64<br>(0.6, 0.68)                       | 0.59<br>(0.53, 0.65)                                | 0.0036<br>(0.0027, 0.0046)                     | -0.0174<br>(-0.086, 0.052)        | -0.076<br>(-0.177, 0.026)                  | -0.093<br>(-0.175, -0.011)                             | 0.00082                                     |
| 4                                                                                                                                                                                                                                                                                           | Viral or Unspecified Meningitis                                                                | 0.42<br>(0.39, 0.45)                      | 0.57<br>(0.49, 0.65)                                | 0.0006<br>(-0.0006, 0.0017)                    | -0.0245<br>(-0.113, 0.064)        | -0.069<br>(-0.198, 0.061)                  | -0.093<br>(-0.198, 0.012)                              | 0.00970                                     |
| 6                                                                                                                                                                                                                                                                                           | Opportunistic Infections                                                                       | 0.67<br>(0.63, 0.71)                      | 0.49<br>(0.43, 0.56)                                | 0.0058<br>(0.0048, 0.0067)                     | 0.1466<br>(0.077, 0.216)          | -0.027<br>(-0.129, 0.076)                  | 0.12<br>(0.037, 0.203)                                 | 0.00000                                     |
| 8                                                                                                                                                                                                                                                                                           | Metastatic Cancer                                                                              | 6.72<br>(6.58, 6.86)                      | 0.56<br>(0.52, 0.6)                                 | 0.0059<br>(0.0053, 0.0065)                     | 0.0365<br>(-0.007, 0.08)          | 0.04<br>(-0.024, 0.105)                    | 0.077<br>(0.025, 0.129)                                | 0.00000                                     |
| 9                                                                                                                                                                                                                                                                                           | Lung, Brain, and Other Severe Cancers, Including Pediatric Acute Lymphoid Leukemia             | 7.37<br>(7.23, 7.51)                      | 0.85<br>(0.83, 0.88)                                | 0.0014<br>(0.001, 0.0018)                      | -0.0033<br>(-0.034, 0.027)        | 0.002<br>(-0.043, 0.047)                   | -0.001<br>(-0.038, 0.035)                              | 0.92578                                     |
| 10                                                                                                                                                                                                                                                                                          | Non-Hodgkin's Lymphomas and Other Cancers and Tumors                                           | 4.78<br>(4.67, 4.89)                      | 0.91<br>(0.87, 0.94)                                | 0.001<br>(0.0004, 0.0015)                      | -0.0056<br>(-0.047, 0.036)        | 0.033<br>(-0.028, 0.095)                   | 0.028<br>(-0.022, 0.077)                               | 0.13145                                     |
| 11                                                                                                                                                                                                                                                                                          | Colorectal, Breast (Age < 50), Kidney, and Other Cancers                                       | 11.98<br>(11.8, 12.16)                    | 0.89<br>(0.86, 0.93)                                | 0.0006<br>(0.0001, 0.0011)                     | -0.0094<br>(-0.048, 0.029)        | 0.027<br>(-0.031, 0.084)                   | 0.017<br>(-0.029, 0.063)                               | 0.27619                                     |
| 12                                                                                                                                                                                                                                                                                          | Breast (Age 50+) and Prostate Cancer, Benign/ Uncertain Brain Tumors; Other Cancers and Tumors | 23<br>(22.75, 23.25)                      | 0.82<br>(0.78, 0.87)                                | 0.0017<br>(0.0011, 0.0023)                     | -0.0102<br>(-0.057, 0.036)        | -0.012<br>(-0.08, 0.057)                   | -0.022<br>(-0.077, 0.034)                              | 0.33494                                     |
| 13                                                                                                                                                                                                                                                                                          | Thyroid Cancer, Melanoma, Neurofibromatosis, and Other Cancers and Tumors                      | 6.23<br>(6.1, 6.36)                       | 0.67<br>(0.62, 0.72)                                | 0.0041<br>(0.0034, 0.0048)                     | -0.0265<br>(-0.078, 0.025)        | -0.103<br>(-0.179, -0.027)                 | -0.13<br>(-0.191, -0.068)                              | 0.00000                                     |
| 18                                                                                                                                                                                                                                                                                          | Pancreas Transplant Status/Complications                                                       | 0.09<br>(0.07, 0.11)                      | 0.51<br>(0.42, 0.61)                                | 0.005<br>(0.0036, 0.0064)                      | -0.0459<br>(-0.152, 0.06)         | -0.178<br>(-0.334, -0.021)                 | -0.224<br>(-0.35, -0.097)                              | 0.00000                                     |
| 19                                                                                                                                                                                                                                                                                          | Diabetes with Acute Complications                                                              | 0.89<br>(0.84, 0.94)                      | 0.65<br>(0.57, 0.73)                                | 0.0038<br>(0.0027, 0.005)                      | 0.028<br>(-0.058, 0.114)          | 0.244<br>(0.117, 0.371)                    | 0.272<br>(0.169, 0.375)                                | 0.00000                                     |
| 20                                                                                                                                                                                                                                                                                          | Diabetes with Chronic Complications                                                            | 27.52<br>(27.25, 27.79)                   | 0.52<br>(0.45, 0.59)                                | 0.0048<br>(0.0037, 0.0059)                     | 0.924<br>(0.842, 1.005)           | 0.237<br>(0.117, 0.357)                    | 1.161<br>(1.064, 1.258)                                | 0.00000                                     |
| 21                                                                                                                                                                                                                                                                                          | Diabetes without Complication                                                                  | 116.77<br>(116.21, 117.33)                | 0.71<br>(0.65, 0.76)                                | 0.0037<br>(0.0028, 0.0045)                     | -0.191<br>(-0.253, -0.129)        | -0.076<br>(-0.167, 0.014)                  | -0.267<br>(-0.341, -0.194)                             | 0.00000                                     |
| 23                                                                                                                                                                                                                                                                                          | Protein-Calorie Malnutrition                                                                   | 1.17<br>(1.11, 1.23)                      | 0.5<br>(0.44, 0.55)                                 | 0.0059<br>(0.0051, 0.0067)                     | 0.0622<br>(0.001, 0.123)          | 0.056<br>(-0.034, 0.145)                   | 0.118<br>(0.046, 0.191)                                | 0.00000                                     |

| HCC | HCC Label                                                                        | 9/15 Rate               | $\alpha$             | $\beta$                      | $\gamma$                    | $\delta$                   | $\gamma + \delta$          | F: $\gamma=\delta=0$ |
|-----|----------------------------------------------------------------------------------|-------------------------|----------------------|------------------------------|-----------------------------|----------------------------|----------------------------|----------------------|
| 26  | Mucopolysaccharidosis                                                            | 0.04<br>(0.03, 0.05)    | 0.35<br>(0.24, 0.46) | 0.0088<br>(0.0072, 0.0105)   | 0.1143<br>(-0.007, 0.236)   | -0.302<br>(-0.481, -0.123) | -0.188<br>(-0.333, -0.043) | 0.00000              |
| 27  | Lipidoses and Glycogenosis                                                       | 0.27<br>(0.24, 0.3)     | 0.77<br>(0.68, 0.86) | 0.004<br>(0.0026, 0.0053)    | -0.4692<br>(-0.567, -0.372) | -0.036<br>(-0.179, 0.108)  | -0.505<br>(-0.621, -0.388) | 0.00000              |
| 28  | Congenital Metabolic Disorders,<br>Not Elsewhere Classified                      | 1.41<br>(1.35, 1.47)    | 0.33<br>(0.27, 0.4)  | 0.0084<br>(0.0074, 0.0093)   | 0.0278<br>(-0.042, 0.098)   | -0.048<br>(-0.151, 0.055)  | -0.02<br>(-0.104, 0.064)   | 0.24389              |
| 29  | Amyloidosis, Porphyria, and Other<br>Metabolic Disorders                         | 0.66<br>(0.62, 0.7)     | 0.53<br>(0.47, 0.6)  | 0.0058<br>(0.0048, 0.0068)   | -0.0035<br>(-0.08, 0.073)   | -0.009<br>(-0.121, 0.103)  | -0.012<br>(-0.103, 0.079)  | 0.88944              |
| 30  | Adrenal, Pituitary, and Other<br>Significant Endocrine Disorders                 | 8.49<br>(8.34, 8.64)    | 0.49<br>(0.44, 0.55) | 0.0067<br>(0.0058, 0.0075)   | 0.0181<br>(-0.044, 0.08)    | -0.079<br>(-0.17, 0.012)   | -0.061<br>(-0.135, 0.013)  | 0.00915              |
| 34  | Liver Transplant<br>Status/Complications                                         | 0.4<br>(0.37, 0.43)     | 0.69<br>(0.62, 0.76) | 0.0044<br>(0.0033, 0.0054)   | 0.0435<br>(-0.036, 0.123)   | -0.078<br>(-0.195, 0.039)  | -0.034<br>(-0.129, 0.06)   | 0.06128              |
| 35  | End-Stage Liver Disease                                                          | 1.01<br>(0.96, 1.06)    | 0.52<br>(0.46, 0.58) | 0.0062<br>(0.0054, 0.0071)   | -0.0167<br>(-0.081, 0.048)  | -0.066<br>(-0.161, 0.029)  | -0.083<br>(-0.159, -0.006) | 0.00149              |
| 36  | Cirrhosis of Liver                                                               | 2.37<br>(2.29, 2.45)    | 0.59<br>(0.54, 0.63) | 0.0053<br>(0.0046, 0.006)    | -0.0631<br>(-0.115, -0.011) | -0.072<br>(-0.149, 0.004)  | -0.135<br>(-0.197, -0.073) | 0.00000              |
| 37  | Chronic Hepatitis                                                                | 3.34<br>(3.24, 3.44)    | 0.76<br>(0.68, 0.84) | 0.0027<br>(0.0016, 0.0039)   | -0.0073<br>(-0.096, 0.081)  | -0.186<br>(-0.316, -0.056) | -0.193<br>(-0.298, -0.088) | 0.00000              |
| 38  | Acute Liver Failure/Disease,<br>Including Neonatal Hepatitis                     | 0.41<br>(0.38, 0.44)    | 0.62<br>(0.56, 0.68) | 0.0033<br>(0.0025, 0.0042)   | -0.0739<br>(-0.139, -0.009) | -0.036<br>(-0.131, 0.059)  | -0.11<br>(-0.187, -0.033)  | 0.00000              |
| 41  | Intestine Transplant<br>Status/Complications                                     | 0.01<br>(0, 0.02)       | 1.38<br>(1.06, 1.71) | -0.0033<br>(-0.0082, 0.0016) | -0.2097<br>(-0.575, 0.155)  | 0.249<br>(-0.288, 0.786)   | 0.039<br>(-0.397, 0.475)   | 0.12596              |
| 42  | Peritonitis/Gastrointestinal<br>Perforation/Necrotizing<br>Enterocolitis         | 0.86<br>(0.81, 0.91)    | 0.63<br>(0.59, 0.68) | 0.004<br>(0.0033, 0.0047)    | -0.0401<br>(-0.091, 0.01)   | -0.052<br>(-0.126, 0.023)  | -0.092<br>(-0.152, -0.031) | 0.00000              |
| 45  | Intestinal Obstruction                                                           | 2.05<br>(1.98, 2.12)    | 0.79<br>(0.71, 0.87) | 0.003<br>(0.0018, 0.0042)    | 0.1026<br>(0.014, 0.191)    | -0.22<br>(-0.35, -0.09)    | -0.117<br>(-0.223, -0.012) | 0.00000              |
| 46  | Chronic Pancreatitis                                                             | 0.66<br>(0.62, 0.7)     | 0.7<br>(0.64, 0.75)  | 0.0032<br>(0.0025, 0.004)    | 0.0365<br>(-0.022, 0.096)   | 0.012<br>(-0.075, 0.099)   | 0.049<br>(-0.022, 0.119)   | 0.01194              |
| 47  | Acute Pancreatitis/Other<br>Pancreatic Disorders and<br>Intestinal Malabsorption | 5.83<br>(5.7, 5.96)     | 0.5<br>(0.43, 0.57)  | 0.0065<br>(0.0054, 0.0075)   | -0.4274<br>(-0.506, -0.349) | 0.245<br>(0.129, 0.36)     | -0.183<br>(-0.276, -0.089) | 0.00000              |
| 48  | Inflammatory Bowel Disease                                                       | 10.98<br>(10.81, 11.15) | 0.68<br>(0.64, 0.73) | 0.0041<br>(0.0034, 0.0048)   | 0.0332<br>(-0.018, 0.084)   | 0.028<br>(-0.047, 0.103)   | 0.061<br>(0, 0.122)        | 0.00080              |
| 54  | Necrotizing Fasciitis                                                            | 0.07<br>(0.06, 0.08)    | 0.65<br>(0.54, 0.77) | 0.0057<br>(0.0039, 0.0074)   | -0.0945<br>(-0.225, 0.036)  | -0.059<br>(-0.252, 0.134)  | -0.153<br>(-0.31, 0.003)   | 0.00063              |
| 55  | Bone/Joint/Muscle<br>Infections/Necrosis                                         | 2.42<br>(2.34, 2.5)     | 0.67<br>(0.62, 0.72) | 0.0037<br>(0.003, 0.0044)    | 0.0136<br>(-0.039, 0.066)   | -0.078<br>(-0.155, -0.001) | -0.064<br>(-0.127, -0.002) | 0.00127              |
| 56  | Rheumatoid Arthritis and<br>Specified Autoimmune Disorders                       | 19.09<br>(18.86, 19.32) | 0.72<br>(0.67, 0.77) | 0.0032<br>(0.0025, 0.0039)   | 0.0505<br>(-0.003, 0.104)   | -0.063<br>(-0.142, 0.016)  | -0.012<br>(-0.076, 0.051)  | 0.00407              |

| HCC | HCC Label                                                                       | 9/15 Rate               | $\alpha$              | $\beta$                      | $\gamma$                    | $\delta$                   | $\gamma+\delta$            | F: $\gamma=\delta=0$ |
|-----|---------------------------------------------------------------------------------|-------------------------|-----------------------|------------------------------|-----------------------------|----------------------------|----------------------------|----------------------|
| 57  | Systemic Lupus Erythematosus and Other Autoimmune Disorders                     | 9.94<br>(9.78, 10.1)    | 0.64<br>(0.6, 0.69)   | 0.0044<br>(0.0037, 0.0051)   | -0.0089<br>(-0.062, 0.044)  | -0.064<br>(-0.143, 0.014)  | -0.073<br>(-0.137, -0.01)  | 0.00065              |
| 61  | Osteogenesis Imperfecta and Other Osteodystrophies                              | 0.16<br>(0.14, 0.18)    | 0.5<br>(0.4, 0.59)    | 0.0055<br>(0.004, 0.0069)    | 0.1672<br>(0.061, 0.274)    | 0.015<br>(-0.142, 0.171)   | 0.182<br>(0.055, 0.309)    | 0.00000              |
| 62  | Congenital/Developmental Skeletal and Connective Tissue Disorders               | 1.54<br>(1.48, 1.6)     | 0.54<br>(0.48, 0.6)   | 0.005<br>(0.0041, 0.0059)    | 0.0339<br>(-0.032, 0.1)     | 0.076<br>(-0.022, 0.173)   | 0.11<br>(0.03, 0.189)      | 0.00002              |
| 63  | Cleft Lip/Cleft Palate                                                          | 0.45<br>(0.42, 0.48)    | 0.76<br>(0.7, 0.82)   | 0.0037<br>(0.0028, 0.0046)   | -0.0187<br>(-0.085, 0.048)  | -0.016<br>(-0.114, 0.082)  | -0.035<br>(-0.114, 0.045)  | 0.23603              |
| 64  | Major Congenital Anomalies of Diaphragm, Abdominal Wall, and Esophagus, Age < 2 | 0.06<br>(0.05, 0.07)    | 0.54<br>(0.4, 0.69)   | 0.0039<br>(0.0017, 0.0061)   | -0.0315<br>(-0.194, 0.131)  | 0.374<br>(0.136, 0.613)    | 0.343<br>(0.149, 0.536)    | 0.00000              |
| 66  | Hemophilia                                                                      | 0.12<br>(0.1, 0.14)     | 0.75<br>(0.66, 0.84)  | 0.0029<br>(0.0015, 0.0042)   | 0.0429<br>(-0.057, 0.143)   | -0.037<br>(-0.184, 0.11)   | 0.006<br>(-0.113, 0.125)   | 0.33259              |
| 67  | Myelodysplastic Syndromes and Myelofibrosis                                     | 0.36<br>(0.33, 0.39)    | 0.93<br>(0.88, 0.98)  | 0.0002<br>(-0.0006, 0.001)   | 0.0006<br>(-0.058, 0.059)   | 0.035<br>(-0.051, 0.12)    | 0.035<br>(-0.034, 0.105)   | 0.21887              |
| 68  | Aplastic Anemia                                                                 | 0.17<br>(0.15, 0.19)    | 1.24<br>(1.12, 1.36)  | -0.005<br>(-0.0068, -0.0033) | 0.1913<br>(0.061, 0.321)    | 0.176<br>(-0.015, 0.368)   | 0.368<br>(0.212, 0.523)    | 0.00000              |
| 69  | Acquired Hemolytic Anemia, Including Hemolytic Disease of Newborn               | 0.43<br>(0.4, 0.46)     | 0.57<br>(0.51, 0.62)  | 0.0049<br>(0.0041, 0.0057)   | 0.0293<br>(-0.032, 0.091)   | 0.032<br>(-0.058, 0.122)   | 0.061<br>(-0.012, 0.134)   | 0.00783              |
| 70  | Sickle Cell Anemia (Hb-SS)                                                      | 0.4<br>(0.37, 0.43)     | 0.59<br>(0.51, 0.68)  | 0.004<br>(0.0027, 0.0053)    | 0.7687<br>(0.675, 0.863)    | -0.052<br>(-0.191, 0.086)  | 0.716<br>(0.604, 0.828)    | 0.00000              |
| 71  | Thalassemia Major                                                               | 0.12<br>(0.1, 0.14)     | 0.08<br>(-0.04, 0.21) | 0.0213<br>(0.0195, 0.0231)   | 0.0483<br>(-0.153, 0.249)   | -0.182<br>(-1.103, 0.739)  | -0.134<br>(-0.907, 0.64)   | 0.70676              |
| 73  | Combined and Other Severe Immunodeficiencies                                    | 0.16<br>(0.14, 0.18)    | 0.46<br>(0.39, 0.53)  | 0.0065<br>(0.0055, 0.0076)   | 0.0556<br>(-0.024, 0.135)   | -0.127<br>(-0.243, -0.01)  | -0.071<br>(-0.166, 0.023)  | 0.00141              |
| 74  | Disorders of the Immune Mechanism                                               | 3.43<br>(3.33, 3.53)    | 0.37<br>(0.31, 0.43)  | 0.008<br>(0.0071, 0.0089)    | 0.0378<br>(-0.031, 0.107)   | 0.132<br>(0.03, 0.233)     | 0.17<br>(0.087, 0.252)     | 0.00000              |
| 75  | Coagulation Defects and Other Specified Hematological Disorders                 | 6.99<br>(6.85, 7.13)    | 0.52<br>(0.47, 0.58)  | 0.0063<br>(0.0055, 0.0071)   | -0.0179<br>(-0.075, 0.039)  | -0.083<br>(-0.166, 0.001)  | -0.101<br>(-0.168, -0.033) | 0.00001              |
| 81  | Drug Psychosis                                                                  | 1.11<br>(1.06, 1.16)    | 0.4<br>(0.36, 0.45)   | 0.0069<br>(0.0062, 0.0075)   | -0.7676<br>(-0.814, -0.721) | -0.156<br>(-0.224, -0.088) | -0.924<br>(-0.979, -0.868) | 0.00000              |
| 82  | Drug Dependence                                                                 | 9.93<br>(9.77, 10.09)   | 0.38<br>(0.33, 0.43)  | 0.0098<br>(0.0091, 0.0105)   | -0.1235<br>(-0.177, -0.07)  | -0.215<br>(-0.294, -0.136) | -0.338<br>(-0.402, -0.275) | 0.00000              |
| 87  | Schizophrenia                                                                   | 2.62<br>(2.54, 2.7)     | 0.78<br>(0.74, 0.82)  | 0.0031<br>(0.0024, 0.0037)   | -0.0329<br>(-0.08, 0.014)   | -0.031<br>(-0.1, 0.039)    | -0.063<br>(-0.12, -0.007)  | 0.00018              |
| 88  | Major Depressive and Bipolar Disorders                                          | 94.78<br>(94.27, 95.29) | 0.89<br>(0.86, 0.92)  | 0.0009<br>(0.0005, 0.0014)   | -0.5964<br>(-0.628, -0.565) | 0.029<br>(-0.018, 0.075)   | -0.568<br>(-0.605, -0.53)  | 0.00000              |

| HCC | HCC Label                                                                                    | 9/15 Rate            | $\alpha$             | $\beta$                     | $\gamma$                    | $\delta$                  | $\gamma + \delta$          | F: $\gamma=\delta=0$ |
|-----|----------------------------------------------------------------------------------------------|----------------------|----------------------|-----------------------------|-----------------------------|---------------------------|----------------------------|----------------------|
| 89  | Reactive and Unspecified Psychosis, Delusional Disorders                                     | 1.89<br>(1.82, 1.96) | 0.63<br>(0.6, 0.66)  | 0.0055<br>(0.0051, 0.006)   | -0.3593<br>(-0.394, -0.324) | -0.14<br>(-0.192, -0.089) | -0.500<br>(-0.542, -0.458) | 0.00000              |
| 90  | Personality Disorders                                                                        | 3.15<br>(3.06, 3.24) | 0.49<br>(0.44, 0.55) | 0.0063<br>(0.0055, 0.007)   | -0.1646<br>(-0.222, -0.107) | -0.034<br>(-0.119, 0.051) | -0.198<br>(-0.267, -0.129) | 0.00000              |
| 94  | Anorexia/Bulimia Nervosa                                                                     | 1.74<br>(1.67, 1.81) | 0.58<br>(0.53, 0.62) | 0.005<br>(0.0043, 0.0056)   | -0.0412<br>(-0.09, 0.007)   | -0.036<br>(-0.107, 0.036) | -0.077<br>(-0.135, -0.019) | 0.00001              |
| 96  | Prader-Willi, Patau, Edwards, and Autosomal Deletion Syndromes                               | 0.33<br>(0.3, 0.36)  | 0.37<br>(0.31, 0.43) | 0.0064<br>(0.0055, 0.0073)  | -0.0992<br>(-0.167, -0.031) | 0.045<br>(-0.055, 0.146)  | -0.054<br>(-0.135, 0.028)  | 0.00000              |
| 97  | Down Syndrome, Fragile X, Other Chromosomal Anomalies, and Congenital Malformation Syndromes | 2.19<br>(2.11, 2.27) | 0.48<br>(0.43, 0.53) | 0.0066<br>(0.0059, 0.0073)  | 0.036<br>(-0.017, 0.09)     | -0.016<br>(-0.095, 0.063) | 0.02<br>(-0.044, 0.084)    | 0.05132              |
| 102 | Autistic Disorder                                                                            | 6.82<br>(6.68, 6.96) | 0.18<br>(0.11, 0.26) | 0.0098<br>(0.0086, 0.0109)  | 0.1801<br>(0.096, 0.265)    | 0.206<br>(0.082, 0.33)    | 0.386<br>(0.286, 0.487)    | 0.00000              |
| 103 | Pervasive Developmental Disorders, Except Autistic Disorder                                  | 2.35<br>(2.27, 2.43) | 1.18<br>(1.01, 1.34) | 0.001<br>(-0.0015, 0.0034)  | -0.5079<br>(-0.69, -0.326)  | -0.067<br>(-0.334, 0.201) | -0.574<br>(-0.792, -0.357) | 0.00000              |
| 106 | Traumatic Complete Lesion Cervical Spinal Cord                                               | 0.01<br>(0, 0.02)    | 0.67<br>(0.42, 0.92) | 0.0003<br>(-0.0035, 0.0041) | -0.4101<br>(-0.691, -0.129) | -0.125<br>(-0.539, 0.288) | -0.535<br>(-0.871, -0.2)   | 0.00000              |
| 107 | Quadriplegia                                                                                 | 0.38<br>(0.35, 0.41) | 0.52<br>(0.46, 0.59) | 0.0046<br>(0.0036, 0.0056)  | 0.0744<br>(0.001, 0.148)    | -0.086<br>(-0.193, 0.022) | -0.011<br>(-0.099, 0.076)  | 0.00228              |
| 108 | Traumatic Complete Lesion Dorsal Spinal Cord                                                 | 0.01<br>(0, 0.02)    | 0.65<br>(0.37, 0.94) | 0.0028<br>(-0.0014, 0.0071) | -0.2384<br>(-0.554, 0.078)  | -0.427<br>(-0.892, 0.038) | -0.666<br>(-1.043, -0.289) | 0.00000              |
| 109 | Paraplegia                                                                                   | 0.45<br>(0.42, 0.48) | 0.55<br>(0.48, 0.62) | 0.005<br>(0.004, 0.0061)    | 0.0744<br>(-0.001, 0.15)    | -0.087<br>(-0.197, 0.024) | -0.012<br>(-0.102, 0.078)  | 0.00306              |
| 110 | Spinal Cord Disorders/Injuries                                                               | 1.15<br>(1.09, 1.21) | 0.62<br>(0.56, 0.67) | 0.0046<br>(0.0038, 0.0055)  | 0.1253<br>(0.062, 0.189)    | -0.003<br>(-0.096, 0.091) | 0.123<br>(0.047, 0.199)    | 0.00000              |
| 111 | Amyotrophic Lateral Sclerosis and Other Anterior Horn Cell Disease                           | 0.27<br>(0.24, 0.3)  | 0.74<br>(0.69, 0.8)  | 0.0027<br>(0.0019, 0.0036)  | 0.02<br>(-0.042, 0.081)     | 0.045<br>(-0.046, 0.135)  | 0.065<br>(-0.009, 0.138)   | 0.00917              |
| 112 | Quadriplegic Cerebral Palsy                                                                  | 0.33<br>(0.3, 0.36)  | 0.75<br>(0.68, 0.81) | 0.0027<br>(0.0018, 0.0037)  | 0.0612<br>(-0.01, 0.133)    | 0.244<br>(0.139, 0.349)   | 0.305<br>(0.22, 0.39)      | 0.00000              |
| 113 | Cerebral Palsy, Except Quadriplegic                                                          | 1.76<br>(1.69, 1.83) | 0.66<br>(0.6, 0.71)  | 0.0039<br>(0.0031, 0.0047)  | 0.0772<br>(0.017, 0.138)    | -0.023<br>(-0.113, 0.066) | 0.054<br>(-0.019, 0.126)   | 0.00003              |
| 114 | Spina Bifida and Other Brain/Spinal/Nervous System Congenital Anomalies                      | 1.28<br>(1.22, 1.34) | 0.6<br>(0.55, 0.66)  | 0.0049<br>(0.004, 0.0057)   | 0.0299<br>(-0.033, 0.093)   | -0.061<br>(-0.154, 0.032) | -0.031<br>(-0.107, 0.044)  | 0.07419              |



| HCC | HCC Label                                                                                           | 9/15 Rate               | $\alpha$             | $\beta$                      | $\gamma$                    | $\delta$                   | $\gamma+\delta$           | F: $\gamma=\delta=0$ |
|-----|-----------------------------------------------------------------------------------------------------|-------------------------|----------------------|------------------------------|-----------------------------|----------------------------|---------------------------|----------------------|
| 115 | Myasthenia Gravis/Myoneural Disorders and Guillain-Barre Syndrome/Inflammatory and Toxic Neuropathy | 2.2<br>(2.12, 2.28)     | 0.57<br>(0.51, 0.62) | 0.0048<br>(0.004, 0.0056)    | 0.025<br>(-0.034, 0.084)    | 0.013<br>(-0.073, 0.1)     | 0.038<br>(-0.032, 0.108)  | 0.07995              |
| 117 | Muscular Dystrophy                                                                                  | 0.38<br>(0.35, 0.41)    | 0.63<br>(0.57, 0.69) | 0.0036<br>(0.0027, 0.0046)   | 0.1299<br>(0.059, 0.201)    | -0.018<br>(-0.123, 0.086)  | 0.112<br>(0.027, 0.196)   | 0.00000              |
| 118 | Multiple Sclerosis                                                                                  | 5.68<br>(5.56, 5.8)     | 0.83<br>(0.79, 0.88) | 0.0018<br>(0.0012, 0.0025)   | 0.0081<br>(-0.042, 0.058)   | -0.012<br>(-0.085, 0.061)  | -0.004<br>(-0.063, 0.055) | 0.81609              |
| 119 | Parkinson`s, Huntington`s, and Spinocerebellar Disease, and Other Neurodegenerative Disorders       | 1.63<br>(1.56, 1.7)     | 0.69<br>(0.64, 0.74) | 0.0034<br>(0.0026, 0.0041)   | -0.0109<br>(-0.067, 0.045)  | -0.056<br>(-0.138, 0.026)  | -0.067<br>(-0.133, 0)     | 0.00348              |
| 120 | Seizure Disorders and Convulsions                                                                   | 12.16<br>(11.98, 12.34) | 0.76<br>(0.72, 0.81) | 0.0033<br>(0.0026, 0.004)    | -0.0254<br>(-0.077, 0.026)  | -0.043<br>(-0.119, 0.032)  | -0.069<br>(-0.13, -0.007) | 0.00048              |
| 121 | Hydrocephalus                                                                                       | 0.89<br>(0.84, 0.94)    | 0.58<br>(0.52, 0.63) | 0.0051<br>(0.0043, 0.006)    | -0.1068<br>(-0.171, -0.043) | -0.087<br>(-0.181, 0.007)  | -0.194<br>(-0.27, -0.118) | 0.00000              |
| 122 | Non-Traumatic Coma, Brain Compression/Anoxic Damage                                                 | 0.78<br>(0.73, 0.83)    | 0.5<br>(0.44, 0.57)  | 0.0065<br>(0.0055, 0.0075)   | 0.1205<br>(0.048, 0.193)    | 0.194<br>(0.087, 0.3)      | 0.314<br>(0.228, 0.401)   | 0.00000              |
| 125 | Respirator Dependence/Tracheostomy Status                                                           | 0.4<br>(0.37, 0.43)     | 0.42<br>(0.35, 0.49) | 0.0073<br>(0.0063, 0.0083)   | 0.0613<br>(-0.012, 0.135)   | -0.087<br>(-0.196, 0.021)  | -0.026<br>(-0.114, 0.062) | 0.00848              |
| 126 | Respiratory Arrest                                                                                  | 0.05<br>(0.04, 0.06)    | 0.93<br>(0.78, 1.09) | -0.0005<br>(-0.0028, 0.0018) | 0.0939<br>(-0.079, 0.267)   | -0.299<br>(-0.553, -0.045) | -0.205<br>(-0.411, 0.001) | 0.00042              |
| 127 | Cardio-Respiratory Failure and Shock, Including Respiratory Distress Syndromes                      | 3.78<br>(3.68, 3.88)    | 0.8<br>(0.75, 0.85)  | 0.0035<br>(0.0027, 0.0042)   | 0.0017<br>(-0.053, 0.057)   | -0.086<br>(-0.167, -0.006) | -0.085<br>(-0.15, -0.019) | 0.00011              |
| 128 | Heart Assistive Device/Artificial Heart                                                             | 0.09<br>(0.07, 0.11)    | 0.18<br>(0.1, 0.27)  | 0.008<br>(0.0067, 0.0092)    | 0.2015<br>(0.108, 0.295)    | -0.118<br>(-0.255, 0.02)   | 0.084<br>(-0.027, 0.195)  | 0.00000              |
| 129 | Heart Transplant                                                                                    | 0.23<br>(0.21, 0.25)    | 0.81<br>(0.74, 0.88) | 0.0024<br>(0.0013, 0.0035)   | 0.04<br>(-0.042, 0.122)     | 0.033<br>(-0.088, 0.154)   | 0.073<br>(-0.025, 0.171)  | 0.01603              |
| 130 | Congestive Heart Failure                                                                            | 11.82<br>(11.64, 12)    | 0.68<br>(0.62, 0.74) | 0.004<br>(0.0031, 0.0048)    | 0.0435<br>(-0.019, 0.106)   | -0.056<br>(-0.149, 0.036)  | -0.013<br>(-0.088, 0.062) | 0.04424              |
| 131 | Acute Myocardial Infarction                                                                         | 0.88<br>(0.83, 0.93)    | 0.82<br>(0.76, 0.89) | 0.0016<br>(0.0006, 0.0026)   | 1.3145<br>(1.241, 1.388)    | 0.159<br>(0.051, 0.267)    | 1.474<br>(1.386, 1.561)   | 0.00000              |
| 132 | Unstable Angina and Other Acute Ischemic Heart Disease                                              | 2.85<br>(2.76, 2.94)    | 0.81<br>(0.76, 0.86) | 0.0017<br>(0.0009, 0.0025)   | -0.316<br>(-0.375, -0.257)  | -0.075<br>(-0.161, 0.012)  | -0.391<br>(-0.461, -0.32) | 0.00000              |
| 135 | Heart Infection/Inflammation, Except Rheumatic                                                      | 1.05<br>(1, 1.1)        | 0.64<br>(0.58, 0.7)  | 0.0049<br>(0.0041, 0.0058)   | 0.0887<br>(0.027, 0.15)     | -0.025<br>(-0.116, 0.065)  | 0.063<br>(-0.01, 0.137)   | 0.00000              |
| 137 | Hypoplastic Left Heart Syndrome and Other Severe Congenital Heart Disorders                         | 0.21<br>(0.19, 0.23)    | 0.63<br>(0.54, 0.71) | 0.0034<br>(0.0021, 0.0047)   | 0.1937<br>(0.096, 0.291)    | 0.127<br>(-0.017, 0.27)    | 0.32<br>(0.204, 0.437)    | 0.00000              |

| HCC | HCC Label                                                                                                         | 9/15 Rate               | $\alpha$             | $\beta$                     | $\gamma$                    | $\delta$                   | $\gamma+\delta$            | $F: \gamma=\delta=0$ |
|-----|-------------------------------------------------------------------------------------------------------------------|-------------------------|----------------------|-----------------------------|-----------------------------|----------------------------|----------------------------|----------------------|
| 138 | Major Congenital Heart/Circulatory Disorders                                                                      | 2.56<br>(2.48, 2.64)    | 0.63<br>(0.58, 0.69) | 0.0046<br>(0.0038, 0.0054)  | -0.0251<br>(-0.085, 0.034)  | -0.008<br>(-0.095, 0.08)   | -0.033<br>(-0.104, 0.038)  | 0.12699              |
| 139 | Atrial and Ventricular Septal Defects, Patent Ductus Arteriosus, and Other Congenital Heart/Circulatory Disorders | 3.13<br>(3.04, 3.22)    | 0.66<br>(0.61, 0.72) | 0.0039<br>(0.0031, 0.0047)  | 0.0411<br>(-0.017, 0.099)   | -0.003<br>(-0.089, 0.083)  | 0.038<br>(-0.032, 0.108)   | 0.01614              |
| 142 | Specified Heart Arrhythmias                                                                                       | 16.7<br>(16.49, 16.91)  | 0.74<br>(0.69, 0.79) | 0.003<br>(0.0023, 0.0038)   | 0.0611<br>(0.005, 0.117)    | -0.024<br>(-0.107, 0.059)  | 0.037<br>(-0.03, 0.104)    | 0.00057              |
| 145 | Intracranial Hemorrhage                                                                                           | 0.95<br>(0.9, 1)        | 0.57<br>(0.53, 0.61) | 0.0049<br>(0.0043, 0.0055)  | -0.0196<br>(-0.065, 0.025)  | -0.061<br>(-0.127, 0.005)  | -0.081<br>(-0.134, -0.027) | 0.00001              |
| 146 | Ischemic or Unspecified Stroke                                                                                    | 2.93<br>(2.84, 3.02)    | 0.45<br>(0.38, 0.51) | 0.0064<br>(0.0054, 0.0074)  | 0.1099<br>(0.036, 0.183)    | -0.054<br>(-0.162, 0.054)  | 0.056<br>(-0.032, 0.144)   | 0.00000              |
| 149 | Cerebral Aneurysm and Arteriovenous Malformation                                                                  | 0.62<br>(0.58, 0.66)    | 0.63<br>(0.56, 0.69) | 0.0051<br>(0.0041, 0.0061)  | 0.0533<br>(-0.02, 0.126)    | 0.028<br>(-0.08, 0.135)    | 0.081<br>(-0.006, 0.168)   | 0.00097              |
| 150 | Hemiplegia/Hemiparesis                                                                                            | 1.47<br>(1.41, 1.53)    | 0.55<br>(0.5, 0.6)   | 0.0053<br>(0.0045, 0.006)   | 0.1426<br>(0.086, 0.2)      | -0.083<br>(-0.167, 0.001)  | 0.059<br>(-0.009, 0.128)   | 0.00000              |
| 151 | Monoplegia, Other Paralytic Syndromes                                                                             | 0.24<br>(0.21, 0.27)    | 0.65<br>(0.56, 0.73) | 0.0044<br>(0.0031, 0.0057)  | 0.1304<br>(0.034, 0.227)    | 0.021<br>(-0.121, 0.163)   | 0.151<br>(0.036, 0.267)    | 0.00000              |
| 153 | Atherosclerosis of the Extremities with Ulceration or Gangrene                                                    | 0.4<br>(0.37, 0.43)     | 0.76<br>(0.68, 0.83) | 0.0037<br>(0.0026, 0.0048)  | 0.184<br>(0.105, 0.263)     | -0.06<br>(-0.177, 0.056)   | 0.124<br>(0.029, 0.218)    | 0.00000              |
| 154 | Vascular Disease with Complications                                                                               | 0.83<br>(0.78, 0.88)    | 0.7<br>(0.65, 0.75)  | 0.0043<br>(0.0036, 0.005)   | -0.1412<br>(-0.195, -0.088) | 0.017<br>(-0.061, 0.096)   | -0.124<br>(-0.188, -0.06)  | 0.00000              |
| 156 | Pulmonary Embolism and Deep Vein Thrombosis                                                                       | 7.05<br>(6.91, 7.19)    | 0.63<br>(0.59, 0.67) | 0.0051<br>(0.0046, 0.0057)  | -0.0674<br>(-0.108, -0.027) | -0.155<br>(-0.214, -0.095) | -0.222<br>(-0.271, -0.173) | 0.00000              |
| 158 | Lung Transplant Status/Complications                                                                              | 0.13<br>(0.11, 0.15)    | 0.77<br>(0.67, 0.87) | 0.0044<br>(0.0029, 0.0059)  | -0.1099<br>(-0.222, 0.002)  | 0.17<br>(0.005, 0.335)     | 0.06<br>(-0.074, 0.194)    | 0.00089              |
| 159 | Cystic Fibrosis                                                                                                   | 0.58<br>(0.54, 0.62)    | 0.85<br>(0.79, 0.91) | 0.0021<br>(0.0012, 0.0029)  | -0.0137<br>(-0.078, 0.051)  | 0.043<br>(-0.052, 0.137)   | 0.029<br>(-0.047, 0.106)   | 0.28577              |
| 160 | Chronic Obstructive Pulmonary Disease, Including Bronchiectasis                                                   | 13.44<br>(13.25, 13.63) | 0.92<br>(0.85, 0.99) | 0.0021<br>(0.001, 0.0031)   | -0.0459<br>(-0.124, 0.033)  | -0.112<br>(-0.228, 0.003)  | -0.158<br>(-0.252, -0.065) | 0.00000              |
| 161 | Asthma                                                                                                            | 67.61<br>(67.18, 68.04) | 0.81<br>(0.75, 0.86) | 0.0034<br>(0.0025, 0.0043)  | 0.0047<br>(-0.06, 0.069)    | -0.063<br>(-0.158, 0.031)  | -0.059<br>(-0.135, 0.018)  | 0.02945              |
| 162 | Fibrosis of Lung and Other Lung Disorders                                                                         | 3.8<br>(3.7, 3.9)       | 0.61<br>(0.55, 0.67) | 0.0052<br>(0.0043, 0.0061)  | -0.4071<br>(-0.475, -0.339) | -0.114<br>(-0.214, -0.015) | -0.521<br>(-0.602, -0.441) | 0.00000              |
| 163 | Aspiration and Specified Bacterial Pneumonias and Other Severe Lung Infections                                    | 0.82<br>(0.77, 0.87)    | 1.01<br>(0.94, 1.08) | 0.0006<br>(-0.0005, 0.0017) | 0.2025<br>(0.12, 0.285)     | -0.044<br>(-0.165, 0.077)  | 0.158<br>(0.06, 0.256)     | 0.00000              |
| 183 | Kidney Transplant Status                                                                                          | 1.6<br>(1.53, 1.67)     | 0.69<br>(0.64, 0.74) | 0.004<br>(0.0032, 0.0047)   | 0.0635<br>(0.007, 0.12)     | -0.025<br>(-0.109, 0.059)  | 0.038<br>(-0.03, 0.106)    | 0.00038              |

| HCC | HCC Label                                                                  | 9/15 Rate              | $\alpha$             | $\beta$                       | $\gamma$                    | $\delta$                  | $\gamma + \delta$          | F: $\gamma=\delta=0$ |
|-----|----------------------------------------------------------------------------|------------------------|----------------------|-------------------------------|-----------------------------|---------------------------|----------------------------|----------------------|
| 184 | End Stage Renal Disease                                                    | 4.69<br>(4.58, 4.8)    | 0.77<br>(0.72, 0.81) | 0.002<br>(0.0012, 0.0027)     | 0.0595<br>(0.006, 0.113)    | -0.064<br>(-0.142, 0.014) | -0.004<br>(-0.068, 0.059)  | 0.00082              |
| 187 | Chronic Kidney Disease, Stage 5                                            | 1.38<br>(1.32, 1.44)   | 0.65<br>(0.58, 0.72) | 0.0036<br>(0.0026, 0.0046)    | 0.1061<br>(0.031, 0.181)    | 0.112<br>(0.002, 0.222)   | 0.218<br>(0.129, 0.307)    | 0.00000              |
| 188 | Chronic Kidney Disease, Severe (Stage 4)                                   | 1.39<br>(1.33, 1.45)   | 0.67<br>(0.6, 0.74)  | 0.0037<br>(0.0027, 0.0047)    | 0.0812<br>(0.005, 0.157)    | -0.071<br>(-0.183, 0.04)  | 0.01<br>(-0.081, 0.1)      | 0.00171              |
| 203 | Ectopic and Molar Pregnancy, Except with Renal Failure, Shock, or Embolism | 0.39<br>(0.36, 0.42)   | 0.93<br>(0.85, 1.01) | 0.0012<br>(-0.0001, 0.0024)   | -0.9029<br>(-0.996, -0.81)  | 0.460<br>(0.323, 0.596)   | -0.443<br>(-0.554, -0.333) | 0.00000              |
| 204 | Miscarriage with Complications                                             | 0.08<br>(0.07, 0.09)   | 1.42<br>(1.3, 1.54)  | -0.0052<br>(-0.007, -0.0034)  | -0.0675<br>(-0.203, 0.068)  | 0.015<br>(-0.185, 0.214)  | -0.053<br>(-0.214, 0.109)  | 0.15033              |
| 205 | Miscarriage with No or Minor Complications                                 | 2.23<br>(2.15, 2.31)   | 0.95<br>(0.9, 1)     | 0.0011<br>(0.0003, 0.0018)    | -0.017<br>(-0.071, 0.037)   | -0.004<br>(-0.084, 0.075) | -0.021<br>(-0.086, 0.043)  | 0.33292              |
| 207 | Completed Pregnancy With Major Complications                               | 0.4<br>(0.37, 0.43)    | 0.56<br>(0.48, 0.64) | 0.0045<br>(0.0033, 0.0058)    | -0.4459<br>(-0.538, -0.354) | 0.195<br>(0.06, 0.33)     | -0.251<br>(-0.361, -0.141) | 0.00000              |
| 208 | Completed Pregnancy With Complications                                     | 5.17<br>(5.05, 5.29)   | 0.68<br>(0.64, 0.72) | 0.0027<br>(0.0021, 0.0032)    | -0.5448<br>(-0.587, -0.502) | 0.037<br>(-0.026, 0.099)  | -0.508<br>(-0.559, -0.457) | 0.00000              |
| 209 | Completed Pregnancy with No or Minor Complications                         | 12.4<br>(12.22, 12.58) | 0.72<br>(0.69, 0.75) | 0.0021<br>(0.0017, 0.0025)    | 0.0287<br>(-0.002, 0.059)   | -0.033<br>(-0.078, 0.011) | -0.004<br>(-0.04, 0.032)   | 0.00476              |
| 217 | Chronic Ulcer of Skin, Except Pressure                                     | 5.24<br>(5.12, 5.36)   | 0.71<br>(0.66, 0.76) | 0.0028<br>(0.0021, 0.0035)    | -0.1054<br>(-0.159, -0.052) | -0.034<br>(-0.113, 0.044) | -0.14<br>(-0.204, -0.076)  | 0.00000              |
| 226 | Hip Fractures and Pathological Vertebral or Humerus Fractures              | 0.65<br>(0.61, 0.69)   | 0.89<br>(0.83, 0.94) | 0.0014<br>(0.0006, 0.0022)    | -0.3464<br>(-0.407, -0.285) | 0.072<br>(-0.017, 0.162)  | -0.274<br>(-0.347, -0.201) | 0.00000              |
| 227 | Pathological Fractures, Except of Vertebrae, Hip, or Humerus               | 0.26<br>(0.23, 0.29)   | 0.93<br>(0.84, 1.02) | -0.0018<br>(-0.0031, -0.0005) | -0.1539<br>(-0.253, -0.055) | -0.028<br>(-0.174, 0.117) | -0.182<br>(-0.3, -0.064)   | 0.00000              |
| 242 | Extremely Immature Newborns, Birthweight < 500 Grams                       | 0.01<br>(0, 0.02)      | 1.12<br>(0.78, 1.45) | 0.0009<br>(-0.004, 0.0059)    | -0.4966<br>(-0.865, -0.128) | -0.076<br>(-0.618, 0.467) | -0.572<br>(-1.013, -0.132) | 0.00000              |
| 243 | Extremely Immature Newborns, Including Birthweight 500-749 Grams           | 0.08<br>(0.07, 0.09)   | 0.69<br>(0.6, 0.79)  | 0.004<br>(0.0026, 0.0055)     | -0.128<br>(-0.236, -0.02)   | -0.034<br>(-0.193, 0.126) | -0.162<br>(-0.291, -0.033) | 0.00000              |
| 244 | Extremely Immature Newborns, Including Birthweight 750-999 Grams           | 0.1<br>(0.08, 0.12)    | 0.92<br>(0.82, 1.01) | 0.002<br>(0.0006, 0.0035)     | -0.0837<br>(-0.194, 0.026)  | -0.101<br>(-0.263, 0.061) | -0.185<br>(-0.316, -0.054) | 0.00001              |
| 245 | Premature Newborns, Including Birthweight 1000-1499 Grams                  | 0.18<br>(0.16, 0.2)    | 0.91<br>(0.82, 1)    | 0.0029<br>(0.0015, 0.0043)    | -0.0596<br>(-0.161, 0.042)  | -0.020<br>(-0.17, 0.129)  | -0.08<br>(-0.201, 0.041)   | 0.01809              |
| 246 | Premature Newborns, Including Birthweight 1500-1999 Grams                  | 0.28<br>(0.25, 0.31)   | 1.04<br>(0.93, 1.16) | 0.0014<br>(-0.0003, 0.0031)   | -0.1113<br>(-0.238, 0.016)  | 0.229<br>(0.043, 0.416)   | 0.118<br>(-0.033, 0.27)    | 0.00024              |
| 247 | Premature Newborns, Including Birthweight 2000-2499 Grams                  | 0.35<br>(0.32, 0.38)   | 0.82<br>(0.74, 0.9)  | 0.0026<br>(0.0014, 0.0039)    | -0.0324<br>(-0.124, 0.059)  | 0.186<br>(0.051, 0.321)   | 0.154<br>(0.045, 0.263)    | 0.00001              |
| 248 | Other Premature, Low Birthweight, Malnourished, or Multiple Birth Newborns | 1<br>(0.95, 1.05)      | 0.79<br>(0.72, 0.86) | 0.0026<br>(0.0015, 0.0036)    | -0.1072<br>(-0.184, -0.03)  | 0.063<br>(-0.05, 0.176)   | -0.045<br>(-0.136, 0.047)  | 0.00002              |

| HCC | HCC Label                                                                                                    | 9/15 Rate            | $\alpha$             | $\beta$                       | $\gamma$                   | $\delta$                 | $\gamma + \delta$        | $F: \gamma=\delta=0$ |
|-----|--------------------------------------------------------------------------------------------------------------|----------------------|----------------------|-------------------------------|----------------------------|--------------------------|--------------------------|----------------------|
| 249 | Term or Post-Term Singleton Newborn, Normal or High Birthweight                                              | 7.28<br>(7.14, 7.42) | 0.95<br>(0.91, 0.99) | -0.0012<br>(-0.0019, -0.0006) | -0.0150<br>(-0.063, 0.033) | 0.030<br>(-0.04, 0.101)  | 0.015<br>(-0.042, 0.072) | 0.32129              |
| 251 | Stem Cell, Including Bone Marrow, Transplant Status/Complications                                            | 0.62<br>(0.58, 0.66) | 0.4<br>(0.35, 0.45)  | 0.0084<br>(0.0076, 0.0091)    | 0.009<br>(-0.044, 0.062)   | 0.031<br>(-0.047, 0.109) | 0.04<br>(-0.023, 0.103)  | 0.08934              |
| 253 | Artificial Openings for Feeding or Elimination                                                               | 1.34<br>(1.28, 1.4)  | 0.53<br>(0.48, 0.59) | 0.006<br>(0.0052, 0.0068)     | 0.0392<br>(-0.019, 0.097)  | 0.028<br>(-0.057, 0.114) | 0.068<br>(-0.002, 0.137) | 0.00092              |
| 254 | Amputation Status, Lower Limb/Amputation Complications                                                       | 0.51<br>(0.47, 0.55) | 0.38<br>(0.31, 0.45) | 0.0073<br>(0.0062, 0.0084)    | 0.2325<br>(0.15, 0.314)    | 0.04<br>(-0.081, 0.161)  | 0.273<br>(0.175, 0.37)   | 0.00000              |
| ALL | # of categories (out of 127), where coefficients are statistically significant (that is, $P < 0.05/127$ )    |                      | 126                  | 116                           | 56                         | 31                       | 70                       | 75                   |
| ALL | # of categories with coefficients that are statistically significant and large ( $ \text{coef}  \geq 20\%$ ) |                      | -                    | -                             | 20                         | 12                       | 30                       | -                    |

**eTable 3.** Piecewise Linear Regression Coefficients Predicting 2010 to 2017 Monthly Prevalence for 282 Agency for Healthcare Research and Quality Clinical Classification System Categories

| Gray-shaded regions are statistically significant; darker (blue) shaded areas are statistically significant and large, that is,  coefficient  ≥ 0.2. Confidence intervals (CI) and statistical significance calculated using the Bonferroni correction. |                                                        |                                           |                                                     |                                                |                                   |                                            |                                                        |                                             |
|---------------------------------------------------------------------------------------------------------------------------------------------------------------------------------------------------------------------------------------------------------|--------------------------------------------------------|-------------------------------------------|-----------------------------------------------------|------------------------------------------------|-----------------------------------|--------------------------------------------|--------------------------------------------------------|---------------------------------------------|
|                                                                                                                                                                                                                                                         |                                                        | Sept 2015 prevalence per 10,000 enrollees | Intercept: Estimated relative rate in Dec 2009 (CI) | Slope: Estimated trend rate before ICD-10 (CI) | Level change in October 2015 (CI) | Time trend change Oct 2015 – Dec 2017 (CI) | Cumulative effect of level and time trend changes (CI) | F-test: For a straight line trend (p-value) |
| CCS                                                                                                                                                                                                                                                     | Category label                                         | 9/15 Rate                                 | $\alpha$                                            | $\beta$                                        | $\gamma$                          | $\delta$                                   | $\gamma + \delta$                                      | F: $\gamma = \delta = 0$                    |
| 1                                                                                                                                                                                                                                                       | Tuberculosis                                           | 0.22<br>(0.2, 0.24)                       | 0.91<br>(0.81, 1.01)                                | 0.0011<br>(-0.0003, 0.0026)                    | -0.0353<br>(-0.141, 0.071)        | -0.131<br>(-0.287, 0.025)                  | -0.167<br>(-0.293, -0.04)                              | 0.00002                                     |
| 2                                                                                                                                                                                                                                                       | Septicemia (Except in Labor)                           | 2.64<br>(2.56, 2.72)                      | 0.54<br>(0.48, 0.59)                                | 0.0054<br>(0.0046, 0.0062)                     | -0.0405<br>(-0.099, 0.018)        | -0.08<br>(-0.166, 0.006)                   | -0.12<br>(-0.19, -0.05)                                | 0                                           |
| 3                                                                                                                                                                                                                                                       | Bacterial Infection; Unspecified Site                  | 8.27<br>(8.12, 8.42)                      | 0.48<br>(0.36, 0.6)                                 | 0.0068<br>(0.0051, 0.0085)                     | 0.3416<br>(0.214, 0.470)          | 0.151<br>(-0.037, 0.34)                    | 0.493<br>(0.34, 0.646)                                 | 0                                           |
| 4                                                                                                                                                                                                                                                       | Mycoses                                                | 39.68<br>(39.35, 40.01)                   | 0.56<br>(0.5, 0.62)                                 | 0.0043<br>(0.0034, 0.0051)                     | 0.0678<br>(0.002, 0.134)          | -0.127<br>(-0.224, -0.03)                  | -0.059<br>(-0.137, 0.02)                               | 0.00002                                     |
| 5                                                                                                                                                                                                                                                       | HIV Infection                                          | 3.81<br>(3.71, 3.91)                      | 0.81<br>(0.75, 0.87)                                | 0.0021<br>(0.0012, 0.003)                      | 0.0201<br>(-0.048, 0.089)         | 0.101<br>(0, 0.202)                        | 0.121<br>(0.039, 0.203)                                | 0                                           |
| 6                                                                                                                                                                                                                                                       | Hepatitis                                              | 5.23<br>(5.11, 5.35)                      | 0.8<br>(0.73, 0.88)                                 | 0.0026<br>(0.0015, 0.0037)                     | 0.0045<br>(-0.078, 0.087)         | -0.124<br>(-0.246, -0.003)                 | -0.120<br>(-0.218, -0.021)                             | 0.0001                                      |
| 7                                                                                                                                                                                                                                                       | Viral Infection                                        | 64.92<br>(64.5, 65.34)                    | 1.01<br>(0.89, 1.12)                                | 0.0017<br>(0, 0.0034)                          | -0.0314<br>(-0.157, 0.095)        | 0.124<br>(-0.061, 0.309)                   | 0.093<br>(-0.058, 0.243)                               | 0.04152                                     |
| 8                                                                                                                                                                                                                                                       | Other Infections; Including Parasitic                  | 7.95<br>(7.8, 8.1)                        | 0.52<br>(0.46, 0.57)                                | 0.0049<br>(0.0041, 0.0057)                     | -0.1895<br>(-0.252, -0.127)       | -0.096<br>(-0.188, -0.004)                 | -0.286<br>(-0.36, -0.211)                              | 0                                           |
| 9                                                                                                                                                                                                                                                       | Sexually Transmitted Infections (Not HIV or Hepatitis) | 3.7<br>(3.6, 3.8)                         | 0.63<br>(0.57, 0.68)                                | 0.005<br>(0.0042, 0.0058)                      | 0.0098<br>(-0.049, 0.069)         | 0.019<br>(-0.068, 0.106)                   | 0.029<br>(-0.042, 0.099)                               | 0.29889                                     |
| 10                                                                                                                                                                                                                                                      | Immunizations and Screening for Infectious Disease     | 187.47<br>(186.76, 188.18)                | 0.21<br>(0.08, 0.34)                                | 0.006<br>(0.004, 0.0079)                       | 0.1689<br>(0.024, 0.314)          | -0.011<br>(-0.225, 0.202)                  | 0.157<br>(-0.015, 0.33)                                | 0.00001                                     |
| 11                                                                                                                                                                                                                                                      | Cancer of Head and Neck                                | 1.9<br>(1.83, 1.97)                       | 0.87<br>(0.83, 0.91)                                | 0.0016<br>(0.0009, 0.0022)                     | -0.028<br>(-0.074, 0.018)         | -0.038<br>(-0.106, 0.03)                   | -0.066<br>(-0.121, -0.011)                             | 0.00004                                     |
| 12                                                                                                                                                                                                                                                      | Cancer of Esophagus                                    | 0.4<br>(0.37, 0.43)                       | 0.86<br>(0.81, 0.91)                                | 0.0007<br>(-0.0001, 0.0014)                    | -0.0137<br>(-0.069, 0.042)        | 0.033<br>(-0.049, 0.115)                   | 0.019<br>(-0.047, 0.085)                               | 0.33923                                     |
| 13                                                                                                                                                                                                                                                      | Cancer of Stomach                                      | 0.35<br>(0.32, 0.38)                      | 0.84<br>(0.78, 0.9)                                 | 0.0014<br>(0.0005, 0.0023)                     | -0.05<br>(-0.116, 0.016)          | 0.263<br>(0.166, 0.359)                    | 0.213<br>(0.134, 0.291)                                | 0                                           |

|    |                 |                      |                      |                            |                            |                           |                          |         |
|----|-----------------|----------------------|----------------------|----------------------------|----------------------------|---------------------------|--------------------------|---------|
| 14 | Cancer of Colon | 3.17<br>(3.08, 3.26) | 0.83<br>(0.79, 0.87) | 0.0013<br>(0.0007, 0.0019) | -0.0123<br>(-0.058, 0.033) | -0.022<br>(-0.088, 0.045) | -0.034<br>(-0.088, 0.02) | 0.05427 |
|----|-----------------|----------------------|----------------------|----------------------------|----------------------------|---------------------------|--------------------------|---------|

| CCS | Category label                              | 9/15 Rate               | $\alpha$             | $\beta$                      | $\gamma$                    | $\delta$                   | $\gamma+\delta$            | F: $\gamma=\delta=0$ |
|-----|---------------------------------------------|-------------------------|----------------------|------------------------------|-----------------------------|----------------------------|----------------------------|----------------------|
| 15  | Cancer of Rectum and Anus                   | 1.76<br>(1.69, 1.83)    | 0.86<br>(0.81, 0.9)  | 0.0008<br>(0.0001, 0.0015)   | 0.0417<br>(-0.008, 0.092)   | 0.058<br>(-0.015, 0.132)   | 0.100<br>(0.04, 0.16)      | 0                    |
| 16  | Cancer of Liver and Intrahepatic Bile Duct  | 0.46<br>(0.42, 0.5)     | 0.7<br>(0.66, 0.75)  | 0.0038<br>(0.0031, 0.0045)   | -0.0474<br>(-0.099, 0.004)  | -0.078<br>(-0.154, -0.002) | -0.125<br>(-0.187, -0.064) | 0                    |
| 17  | Cancer of Pancreas                          | 0.65<br>(0.61, 0.69)    | 0.75<br>(0.72, 0.78) | 0.0031<br>(0.0027, 0.0036)   | -0.0364<br>(-0.069, -0.004) | -0.045<br>(-0.093, 0.003)  | -0.081<br>(-0.12, -0.042)  | 0                    |
| 18  | Cancer of Other GI Organs; Peritoneum       | 0.62<br>(0.58, 0.66)    | 0.66<br>(0.61, 0.7)  | 0.0039<br>(0.0032, 0.0046)   | 0.0033<br>(-0.046, 0.053)   | 0.019<br>(-0.053, 0.092)   | 0.023<br>(-0.036, 0.082)   | 0.36677              |
| 19  | Cancer of Bronchus; Lung                    | 2.22<br>(2.14, 2.3)     | 0.97<br>(0.93, 1.01) | -0.0003<br>(-0.0009, 0.0003) | -0.0137<br>(-0.058, 0.031)  | 0.032<br>(-0.034, 0.098)   | 0.018<br>(-0.035, 0.071)   | 0.20684              |
| 20  | Cancer; Other Respiratory and Intrathoracic | 0.07<br>(0.06, 0.08)    | 0.86<br>(0.74, 0.99) | 0.0001<br>(-0.0017, 0.002)   | -0.0717<br>(-0.209, 0.066)  | 0.026<br>(-0.176, 0.228)   | -0.046<br>(-0.21, 0.118)   | 0.11511              |
| 21  | Cancer of Bone and Connective Tissue        | 0.92<br>(0.87, 0.97)    | 0.87<br>(0.83, 0.92) | 0.0015<br>(0.0008, 0.0021)   | -0.016<br>(-0.064, 0.032)   | 0.008<br>(-0.063, 0.079)   | -0.008<br>(-0.065, 0.049)  | 0.43664              |
| 22  | Melanomas of Skin                           | 4.18<br>(4.07, 4.29)    | 0.56<br>(0.5, 0.62)  | 0.0056<br>(0.0047, 0.0065)   | -0.1176<br>(-0.186, -0.049) | -0.091<br>(-0.192, 0.01)   | -0.209<br>(-0.29, -0.127)  | 0                    |
| 23  | Other Non-Epithelial Cancer of Skin         | 14.89<br>(14.69, 15.09) | 0.62<br>(0.55, 0.69) | 0.0041<br>(0.0031, 0.0051)   | -0.0521<br>(-0.13, 0.026)   | -0.109<br>(-0.223, 0.005)  | -0.161<br>(-0.254, -0.068) | 0                    |
| 24  | Cancer of Breast                            | 18.71<br>(18.48, 18.94) | 0.81<br>(0.77, 0.86) | 0.0017<br>(0.001, 0.0023)    | -0.005<br>(-0.054, 0.044)   | 0<br>(-0.071, 0.072)       | -0.005<br>(-0.063, 0.053)  | 0.89643              |
| 25  | Cancer of Uterus                            | 1.44<br>(1.38, 1.5)     | 0.72<br>(0.67, 0.77) | 0.0036<br>(0.0029, 0.0043)   | -0.0308<br>(-0.083, 0.021)  | -0.018<br>(-0.094, 0.058)  | -0.049<br>(-0.11, 0.013)   | 0.00338              |
| 26  | Cancer of Cervix                            | 5.74<br>(5.62, 5.86)    | 1.38<br>(1.27, 1.48) | -0.0056<br>(-0.0073, -0.004) | 0.0792<br>(-0.041, 0.2)     | 0.194<br>(0.017, 0.372)    | 0.273<br>(0.129, 0.417)    | 0                    |
| 27  | Cancer of Ovary                             | 1.31<br>(1.25, 1.37)    | 0.91<br>(0.87, 0.95) | 0.0008<br>(0.0002, 0.0014)   | -0.0354<br>(-0.079, 0.008)  | -0.016<br>(-0.08, 0.047)   | -0.052<br>(-0.103, 0)      | 0.0001               |
| 28  | Cancer of Other Female Genital Organs       | 0.4<br>(0.37, 0.43)     | 0.82<br>(0.74, 0.89) | 0.0021<br>(0.001, 0.0032)    | 0.5476<br>(0.464, 0.631)    | -0.071<br>(-0.195, 0.052)  | 0.476<br>(0.376, 0.576)    | 0                    |
| 29  | Cancer of Prostate                          | 5.41<br>(5.29, 5.53)    | 0.89<br>(0.84, 0.95) | 0.0005<br>(-0.0004, 0.0013)  | 0.003<br>(-0.059, 0.065)    | 0.042<br>(-0.049, 0.133)   | 0.045<br>(-0.029, 0.119)   | 0.08771              |
| 30  | Cancer of Testis                            | 0.62<br>(0.58, 0.66)    | 0.8<br>(0.74, 0.86)  | 0.0026<br>(0.0017, 0.0035)   | 0.0118<br>(-0.055, 0.079)   | -0.04<br>(-0.138, 0.058)   | -0.028<br>(-0.108, 0.051)  | 0.30929              |

| CCS | Category label                                        | 9/15 Rate               | $\alpha$             | $\beta$                      | $\gamma$                   | $\delta$                   | $\gamma+\delta$            | F: $\gamma=\delta=0$ |
|-----|-------------------------------------------------------|-------------------------|----------------------|------------------------------|----------------------------|----------------------------|----------------------------|----------------------|
| 31  | Cancer of Other Male Genital Organs                   | 0.03<br>(0.02, 0.04)    | 1.31<br>(1.07, 1.55) | -0.0004<br>(-0.0039, 0.0031) | 0.2216<br>(-0.042, 0.485)  | -0.06<br>(-0.447, 0.328)   | 0.162<br>(-0.153, 0.476)   | 0.00341              |
| 32  | Cancer of Bladder                                     | 1.26<br>(1.2, 1.32)     | 0.92<br>(0.86, 0.97) | 0.0006<br>(-0.0002, 0.0014)  | -0.0204<br>(-0.078, 0.037) | -0.009<br>(-0.094, 0.076)  | -0.029<br>(-0.098, 0.039)  | 0.15349              |
| 33  | Cancer of Kidney and Renal Pelvis                     | 1.3<br>(1.24, 1.36)     | 0.74<br>(0.69, 0.79) | 0.0031<br>(0.0022, 0.0039)   | 0.0282<br>(-0.032, 0.088)  | 0.024<br>(-0.065, 0.112)   | 0.052<br>(-0.02, 0.123)    | 0.01215              |
| 34  | Cancer of Other Urinary Organs                        | 0.08<br>(0.07, 0.09)    | 0.88<br>(0.76, 1)    | 0.002<br>(0.0002, 0.0039)    | -0.0967<br>(-0.232, 0.039) | 0.209<br>(0.009, 0.408)    | 0.112<br>(-0.05, 0.274)    | 0.00094              |
| 35  | Cancer of Brain and Nervous System                    | 1.24<br>(1.18, 1.3)     | 0.84<br>(0.8, 0.88)  | 0.0014<br>(0.0008, 0.002)    | 0.0439<br>(-0.001, 0.089)  | -0.079<br>(-0.145, -0.013) | -0.035<br>(-0.088, 0.019)  | 0.00009              |
| 36  | Cancer of Thyroid                                     | 3.02<br>(2.93, 3.11)    | 0.59<br>(0.53, 0.64) | 0.0055<br>(0.0047, 0.0063)   | 0.0154<br>(-0.044, 0.075)  | -0.107<br>(-0.195, -0.02)  | -0.092<br>(-0.163, -0.021) | 0.00002              |
| 37  | Hodgkin's Disease                                     | 0.79<br>(0.74, 0.84)    | 0.89<br>(0.84, 0.94) | 0.0015<br>(0.0007, 0.0022)   | 0.0092<br>(-0.046, 0.064)  | -0.001<br>(-0.081, 0.08)   | 0.009<br>(-0.057, 0.074)   | 0.75697              |
| 38  | Non-Hodgkin's Lymphoma                                | 2.89<br>(2.8, 2.98)     | 0.92<br>(0.88, 0.96) | 0.0004<br>(-0.0002, 0.0011)  | 0.0007<br>(-0.046, 0.047)  | 0.029<br>(-0.04, 0.098)    | 0.03<br>(-0.026, 0.085)    | 0.14776              |
| 39  | Leukemias                                             | 2.48<br>(2.4, 2.56)     | 0.83<br>(0.79, 0.87) | 0.0024<br>(0.0018, 0.0029)   | -0.0094<br>(-0.05, 0.031)  | 0.037<br>(-0.023, 0.097)   | 0.027<br>(-0.021, 0.076)   | 0.06955              |
| 40  | Multiple Myeloma                                      | 1.18<br>(1.12, 1.24)    | 0.7<br>(0.67, 0.74)  | 0.0041<br>(0.0035, 0.0046)   | 0.0066<br>(-0.035, 0.048)  | -0.008<br>(-0.069, 0.052)  | -0.002<br>(-0.051, 0.047)  | 0.82527              |
| 41  | Cancer; Other and Unspecified Primary                 | 1.4<br>(1.34, 1.46)     | 0.87<br>(0.81, 0.93) | 0.0017<br>(0.0007, 0.0026)   | 0.0148<br>(-0.053, 0.082)  | 0.311<br>(0.212, 0.41)     | 0.326<br>(0.245, 0.406)    | 0                    |
| 42  | Secondary Malignancies                                | 6.08<br>(5.95, 6.21)    | 0.53<br>(0.49, 0.58) | 0.0063<br>(0.0057, 0.007)    | 0.048<br>(-0.001, 0.097)   | 0.031<br>(-0.041, 0.103)   | 0.079<br>(0.021, 0.138)    | 0                    |
| 43  | Malignant Neoplasm Without Specification of Site      | 1.16<br>(1.1, 1.22)     | 0.37<br>(0.28, 0.45) | 0.0094<br>(0.0082, 0.0107)   | -0.14<br>(-0.232, -0.048)  | -0.220<br>(-0.356, -0.084) | -0.360<br>(-0.47, -0.25)   | 0                    |
| 44  | Neoplasms of Unspecified Nature or Uncertain Behavior | 39.66<br>(39.33, 39.99) | 0.71<br>(0.65, 0.78) | 0.0025<br>(0.0015, 0.0035)   | -0.0447<br>(-0.117, 0.027) | -0.040<br>(-0.145, 0.066)  | -0.085<br>(-0.17, 0.001)   | 0.00044              |
| 45  | Maintenance Chemotherapy; Radiotherapy                | 8.87<br>(8.71, 9.03)    | 0.56<br>(0.51, 0.61) | 0.0054<br>(0.0046, 0.0062)   | -0.0144<br>(-0.072, 0.044) | -0.047<br>(-0.132, 0.039)  | -0.061<br>(-0.13, 0.008)   | 0.00585              |

| CCS | Category label                                        | 9/15 Rate                  | $\alpha$             | $\beta$                    | $\gamma$                    | $\delta$                   | $\gamma+\delta$            | F: $\gamma=\delta=0$ |
|-----|-------------------------------------------------------|----------------------------|----------------------|----------------------------|-----------------------------|----------------------------|----------------------------|----------------------|
| 46  | Benign Neoplasm of Uterus                             | 8.36<br>(8.21, 8.51)       | 0.64<br>(0.57, 0.71) | 0.0037<br>(0.0027, 0.0048) | 0.0794<br>(0.004, 0.155)    | -0.055<br>(-0.165, 0.056)  | 0.025<br>(-0.065, 0.115)   | 0.00079              |
| 47  | Other and unspecified benign neoplasm                 | 91.24<br>(90.74, 91.74)    | 0.53<br>(0.46, 0.6)  | 0.0047<br>(0.0036, 0.0058) | 0.0462<br>(-0.034, 0.126)   | -0.004<br>(-0.122, 0.113)  | 0.042<br>(-0.054, 0.137)   | 0.0433               |
| 48  | Thyroid Disorders                                     | 87.33<br>(86.84, 87.82)    | 0.51<br>(0.45, 0.58) | 0.0064<br>(0.0054, 0.0073) | -0.0197<br>(-0.088, 0.049)  | -0.094<br>(-0.196, 0.007)  | -0.114<br>(-0.196, -0.032) | 0.00001              |
| 49  | Diabetes Mellitus Without Complication                | 118.99<br>(118.42, 119.56) | 0.57<br>(0.5, 0.64)  | 0.0053<br>(0.0043, 0.0063) | 0.0286<br>(-0.045, 0.102)   | -0.105<br>(-0.213, 0.003)  | -0.076<br>(-0.164, 0.011)  | 0.00176              |
| 50  | Diabetes Mellitus with Complications                  | 51.16<br>(50.79, 51.53)    | 0.66<br>(0.6, 0.72)  | 0.0037<br>(0.0028, 0.0046) | 0.1385<br>(0.072, 0.205)    | 0.053<br>(-0.045, 0.151)   | 0.192<br>(0.112, 0.271)    | 0                    |
| 51  | Other Endocrine Disorders                             | 39<br>(38.68, 39.32)       | 0.43<br>(0.38, 0.48) | 0.0085<br>(0.0078, 0.0092) | -0.0606<br>(-0.112, -0.009) | -0.114<br>(-0.19, -0.038)  | -0.174<br>(-0.236, -0.113) | 0                    |
| 52  | Nutritional Deficiencies                              | 46.62<br>(46.26, 46.98)    | 0.21<br>(0.13, 0.3)  | 0.0102<br>(0.009, 0.0114)  | 0.135<br>(0.045, 0.225)     | -0.001<br>(-0.134, 0.131)  | 0.134<br>(0.027, 0.241)    | 0                    |
| 53  | Disorders of Lipid Metabolism                         | 187.56<br>(186.85, 188.27) | 0.58<br>(0.51, 0.65) | 0.0056<br>(0.0046, 0.0067) | 0.0108<br>(-0.068, 0.089)   | -0.104<br>(-0.22, 0.012)   | -0.093<br>(-0.187, 0.001)  | 0.00137              |
| 54  | Gout and Other Crystal Arthropathies                  | 10.32<br>(10.15, 10.49)    | 0.53<br>(0.47, 0.59) | 0.006<br>(0.0051, 0.0069)  | -0.0667<br>(-0.133, -0.001) | -0.124<br>(-0.221, -0.027) | -0.191<br>(-0.27, -0.112)  | 0                    |
| 55  | Fluid and Electrolyte Disorders                       | 16.94<br>(16.73, 17.15)    | 0.56<br>(0.51, 0.62) | 0.0064<br>(0.0055, 0.0072) | -0.0769<br>(-0.139, -0.014) | -0.039<br>(-0.131, 0.053)  | -0.116<br>(-0.19, -0.041)  | 0                    |
| 56  | Cystic Fibrosis                                       | 0.58<br>(0.54, 0.62)       | 0.85<br>(0.79, 0.91) | 0.0021<br>(0.0012, 0.003)  | -0.0137<br>(-0.082, 0.055)  | 0.043<br>(-0.058, 0.144)   | 0.029<br>(-0.053, 0.111)   | 0.28577              |
| 57  | Immunity Disorders                                    | 3.41<br>(3.31, 3.51)       | 0.36<br>(0.29, 0.44) | 0.008<br>(0.0069, 0.0092)  | 0.616<br>(0.534, 0.699)     | 0.164<br>(0.043, 0.285)    | 0.780<br>(0.682, 0.879)    | 0                    |
| 58  | Other Nutritional; Endocrine; and Metabolic Disorders | 157.67<br>(157.02, 158.32) | 0.19<br>(0.08, 0.3)  | 0.0097<br>(0.0082, 0.0113) | 0.1691<br>(0.051, 0.287)    | 0.257<br>(0.084, 0.431)    | 0.426<br>(0.285, 0.567)    | 0                    |
| 59  | Deficiency and Other Anemia                           | 37.26<br>(36.94, 37.58)    | 0.57<br>(0.51, 0.63) | 0.005<br>(0.0041, 0.006)   | 0.0299<br>(-0.037, 0.097)   | -0.043<br>(-0.142, 0.056)  | -0.013<br>(-0.093, 0.067)  | 0.19192              |
| 60  | Acute Posthemorrhagic Anemia                          | 1.11<br>(1.06, 1.16)       | 0.47<br>(0.41, 0.54) | 0.0065<br>(0.0056, 0.0075) | 0.0699<br>(-0.002, 0.142)   | -0.104<br>(-0.21, 0.002)   | -0.034<br>(-0.12, 0.052)   | 0.00056              |



| CCS | Category label                                                                    | 9/15 Rate               | $\alpha$             | $\beta$                    | $\gamma$                    | $\delta$                   | $\gamma + \delta$          | F: $\gamma=\delta=0$ |
|-----|-----------------------------------------------------------------------------------|-------------------------|----------------------|----------------------------|-----------------------------|----------------------------|----------------------------|----------------------|
| 61  | Sickle Cell Anemia                                                                | 1.03<br>(0.98, 1.08)    | 0.53<br>(0.44, 0.61) | 0.0059<br>(0.0046, 0.0071) | 0.0956<br>(0.003, 0.188)    | 0.012<br>(-0.123, 0.148)   | 0.108<br>(-0.002, 0.218)   | 0.00002              |
| 62  | Coagulation and Hemorrhagic Disorders                                             | 9<br>(8.84, 9.16)       | 0.54<br>(0.49, 0.6)  | 0.0054<br>(0.0046, 0.0062) | 0.0413<br>(-0.02, 0.102)    | -0.042<br>(-0.132, 0.048)  | 0.000<br>(-0.073, 0.073)   | 0.04715              |
| 63  | Diseases of White Blood Cells                                                     | 8.82<br>(8.67, 8.97)    | 0.46<br>(0.41, 0.52) | 0.007<br>(0.0062, 0.0079)  | 0.0436<br>(-0.02, 0.108)    | -0.019<br>(-0.113, 0.075)  | 0.024<br>(-0.052, 0.101)   | 0.03108              |
| 64  | Other Hematologic Conditions                                                      | 2.47<br>(2.39, 2.55)    | 0.33<br>(0.24, 0.41) | 0.0081<br>(0.0068, 0.0094) | 0.4744<br>(0.38, 0.568)     | 0.173<br>(0.035, 0.312)    | 0.648<br>(0.535, 0.76)     | 0                    |
| 76  | Meningitis (Except That Caused by Tuberculosis or Sexually Transmitted Disease)   | 0.46<br>(0.42, 0.5)     | 0.63<br>(0.55, 0.71) | 0.0002<br>(-0.001, 0.0014) | 0.0063<br>(-0.084, 0.097)   | -0.064<br>(-0.197, 0.069)  | -0.058<br>(-0.166, 0.05)   | 0.12872              |
| 77  | Encephalitis (Except That Caused by Tuberculosis or Sexually Transmitted Disease) | 0.39<br>(0.36, 0.42)    | 0.57<br>(0.5, 0.63)  | 0.0048<br>(0.0038, 0.0057) | -0.1631<br>(-0.235, -0.091) | -0.193<br>(-0.299, -0.087) | -0.356<br>(-0.442, -0.271) | 0                    |
| 78  | Other CNS Infection and Poliomyelitis                                             | 0.2<br>(0.18, 0.22)     | 0.78<br>(0.7, 0.86)  | 0.0026<br>(0.0014, 0.0037) | 0.3413<br>(0.254, 0.428)    | -0.219<br>(-0.347, -0.091) | 0.122<br>(0.018, 0.226)    | 0                    |
| 79  | Parkinson's Disease                                                               | 1.16<br>(1.1, 1.22)     | 0.73<br>(0.67, 0.79) | 0.0029<br>(0.002, 0.0038)  | 0.0125<br>(-0.055, 0.08)    | -0.03<br>(-0.129, 0.069)   | -0.018<br>(-0.098, 0.063)  | 0.53323              |
| 80  | Multiple Sclerosis                                                                | 5.63<br>(5.51, 5.75)    | 0.84<br>(0.79, 0.88) | 0.0018<br>(0.001, 0.0025)  | 0.0082<br>(-0.045, 0.061)   | -0.014<br>(-0.092, 0.065)  | -0.005<br>(-0.069, 0.058)  | 0.78788              |
| 81  | Other Hereditary and Degenerative Nervous System Conditions                       | 10.19<br>(10.02, 10.36) | 0.51<br>(0.45, 0.56) | 0.0061<br>(0.0052, 0.007)  | -0.0226<br>(-0.088, 0.043)  | -0.060<br>(-0.157, 0.037)  | -0.083<br>(-0.161, -0.004) | 0.00069              |
| 82  | Paralysis                                                                         | 3.84<br>(3.74, 3.94)    | 0.61<br>(0.56, 0.66) | 0.0044<br>(0.0036, 0.0052) | 0.0749<br>(0.018, 0.132)    | -0.034<br>(-0.118, 0.05)   | 0.041<br>(-0.027, 0.109)   | 0.00001              |
| 83  | Epilepsy; Convulsions                                                             | 12.13<br>(11.95, 12.31) | 0.76<br>(0.71, 0.81) | 0.0033<br>(0.0026, 0.0041) | -0.0258<br>(-0.081, 0.029)  | -0.044<br>(-0.125, 0.037)  | -0.07<br>(-0.135, -0.004)  | 0.00039              |
| 84  | Headache; Including Migraine                                                      | 83.04<br>(82.57, 83.51) | 0.68<br>(0.63, 0.74) | 0.0043<br>(0.0035, 0.0052) | 0.0519<br>(-0.01, 0.113)    | -0.082<br>(-0.172, 0.009)  | -0.03<br>(-0.103, 0.044)   | 0.00225              |
| 85  | Coma; Stupor; and Brain Damage                                                    | 1.35<br>(1.29, 1.41)    | 0.73<br>(0.24, 1.23) | 0.01<br>(0.0027, 0.0174)   | -0.6227<br>(-1.169, -0.076) | 0.360<br>(-0.443, 1.164)   | -0.262<br>(-0.914, 0.39)   | 0.0002               |
| 86  | Cataract                                                                          | 27.79<br>(27.52, 28.06) | 0.49<br>(0.42, 0.56) | 0.006<br>(0.0049, 0.007)   | 0.0376<br>(-0.039, 0.114)   | -0.091<br>(-0.204, 0.022)  | -0.053<br>(-0.145, 0.038)  | 0.01419              |

| CCS | Category label                                                                                                     | 9/15 Rate                  | $\alpha$             | $\beta$                     | $\gamma$                    | $\delta$                   | $\gamma + \delta$          | F: $\gamma=\delta=0$ |
|-----|--------------------------------------------------------------------------------------------------------------------|----------------------------|----------------------|-----------------------------|-----------------------------|----------------------------|----------------------------|----------------------|
| 87  | Retinal Detachments; Defects; Vascular Occlusion; and Retinopathy                                                  | 21.8<br>(21.56, 22.04)     | 0.57<br>(0.52, 0.63) | 0.0054<br>(0.0047, 0.0062)  | -0.2205<br>(-0.278, -0.163) | -0.067<br>(-0.152, 0.018)  | -0.288<br>(-0.357, -0.219) | 0                    |
| 88  | Glaucoma                                                                                                           | 26.54<br>(26.27, 26.81)    | 0.83<br>(0.77, 0.89) | 0.0024<br>(0.0015, 0.0033)  | -0.3085<br>(-0.376, -0.241) | 0.15<br>(0.05, 0.249)      | -0.159<br>(-0.24, -0.078)  | 0                    |
| 89  | Blindness and Vision Defects                                                                                       | 25.03<br>(24.77, 25.29)    | 0.64<br>(0.56, 0.72) | 0.004<br>(0.0028, 0.0052)   | 0.5432<br>(0.453, 0.633)    | -0.031<br>(-0.163, 0.101)  | 0.513<br>(0.406, 0.62)     | 0                    |
| 90  | Inflammation; Infection of Eye (Except that Caused by Tuberculosis or Sexually Transmitted disease)                | 51.05<br>(50.68, 51.42)    | 0.85<br>(0.78, 0.92) | 0.0025<br>(0.0014, 0.0035)  | 0.046<br>(-0.032, 0.124)    | -0.089<br>(-0.204, 0.026)  | -0.043<br>(-0.136, 0.051)  | 0.01725              |
| 91  | Other Eye Disorders                                                                                                | 63.34<br>(62.93, 63.75)    | 0.68<br>(0.62, 0.73) | 0.0037<br>(0.0029, 0.0045)  | -0.0397<br>(-0.101, 0.021)  | -0.047<br>(-0.137, 0.043)  | -0.087<br>(-0.16, -0.014)  | 0.00004              |
| 92  | Otitis Media and Related Conditions                                                                                | 69.23<br>(68.8, 69.66)     | 1.44<br>(1.32, 1.56) | -0.0002<br>(-0.002, 0.0016) | 0.0609<br>(-0.072, 0.194)   | 0.012<br>(-0.185, 0.208)   | 0.073<br>(-0.087, 0.232)   | 0.08196              |
| 93  | Conditions Associated with Dizziness or Vertigo                                                                    | 26.81<br>(26.54, 27.08)    | 0.65<br>(0.6, 0.7)   | 0.0039<br>(0.0031, 0.0046)  | 0.0024<br>(-0.055, 0.059)   | -0.062<br>(-0.145, 0.022)  | -0.059<br>(-0.127, 0.009)  | 0.00682              |
| 94  | Other Ear and Sense Organ Disorders                                                                                | 62.19<br>(61.78, 62.6)     | 0.75<br>(0.69, 0.81) | 0.0031<br>(0.0021, 0.004)   | -0.0497<br>(-0.12, 0.02)    | -0.047<br>(-0.15, 0.057)   | -0.096<br>(-0.18, -0.013)  | 0.00004              |
| 95  | Other Nervous System Disorders                                                                                     | 116.29<br>(115.73, 116.85) | 0.46<br>(0.4, 0.52)  | 0.0064<br>(0.0055, 0.0073)  | 0.0476<br>(-0.018, 0.113)   | 0.049<br>(-0.048, 0.145)   | 0.096<br>(0.018, 0.175)    | 0.00001              |
| 96  | Heart Valve Disorders                                                                                              | 21.57<br>(21.33, 21.81)    | 0.7<br>(0.63, 0.76)  | 0.0032<br>(0.0023, 0.0042)  | -0.0138<br>(-0.086, 0.059)  | -0.024<br>(-0.13, 0.082)   | -0.038<br>(-0.124, 0.049)  | 0.23951              |
| 97  | Peri-; Endo-; and Myocarditis; Cardiomyopathy (Except That Caused by Tuberculosis or Sexually Transmitted Disease) | 6.59<br>(6.46, 6.72)       | 0.66<br>(0.6, 0.72)  | 0.0043<br>(0.0034, 0.0053)  | 0.07<br>(0, 0.14)           | -0.115<br>(-0.218, -0.012) | -0.045<br>(-0.129, 0.039)  | 0.00017              |
| 98  | Essential Hypertension                                                                                             | 251.89<br>(251.07, 252.71) | 0.66<br>(0.59, 0.72) | 0.0046<br>(0.0036, 0.0056)  | 0.0512<br>(-0.02, 0.123)    | -0.106<br>(-0.211, -0.001) | -0.055<br>(-0.14, 0.031)   | 0.00146              |
| 99  | Hypertension with Complications and Secondary Hypertension                                                         | 14.17<br>(13.97, 14.37)    | 0.81<br>(0.74, 0.88) | 0.0011<br>(0, 0.0021)       | -0.1405<br>(-0.218, -0.063) | 0.182<br>(0.068, 0.296)    | 0.041<br>(-0.051, 0.134)   | 0                    |
| 100 | Acute Myocardial Infarction                                                                                        | 1.97<br>(1.9, 2.04)        | 0.65<br>(0.6, 0.7)   | 0.0048<br>(0.0041, 0.0056)  | 0.0076<br>(-0.05, 0.065)    | -0.005<br>(-0.089, 0.079)  | 0.003<br>(-0.066, 0.071)   | 0.88353              |
| 101 | Coronary Atherosclerosis and Other Heart Disease                                                                   | 27.71<br>(27.44, 27.98)    | 0.9<br>(0.83, 0.96)  | 0.0005<br>(-0.0005, 0.0016) | 0.0179<br>(-0.058, 0.094)   | -0.002<br>(-0.114, 0.109)  | 0.016<br>(-0.075, 0.106)   | 0.58829              |

| CCS | Category label                                        | 9/15 Rate               | $\alpha$             | $\beta$                     | $\gamma$                    | $\delta$                   | $\gamma + \delta$          | F: $\gamma=\delta=0$ |
|-----|-------------------------------------------------------|-------------------------|----------------------|-----------------------------|-----------------------------|----------------------------|----------------------------|----------------------|
| 102 | Nonspecific Chest Pain                                | 41.07<br>(40.74, 41.4)  | 0.94<br>(0.88, 0.99) | 0.0006<br>(-0.0002, 0.0014) | 0.0258<br>(-0.033, 0.085)   | -0.007<br>(-0.094, 0.08)   | 0.019<br>(-0.052, 0.089)   | 0.19922              |
| 103 | Pulmonary Heart Disease                               | 5.02<br>(4.9, 5.14)     | 0.51<br>(0.46, 0.56) | 0.0064<br>(0.0057, 0.0072)  | 0.0375<br>(-0.018, 0.093)   | -0.131<br>(-0.212, -0.05)  | -0.093<br>(-0.159, -0.028) | 0                    |
| 104 | Other and Ill-Defined Heart Disease                   | 5.26<br>(5.14, 5.38)    | 0.51<br>(0.42, 0.59) | 0.0058<br>(0.0045, 0.007)   | -0.0863<br>(-0.179, 0.006)  | -0.071<br>(-0.207, 0.065)  | -0.157<br>(-0.268, -0.047) | 0                    |
| 105 | Conduction Disorders                                  | 5.21<br>(5.09, 5.33)    | 0.51<br>(0.45, 0.58) | 0.0063<br>(0.0053, 0.0072)  | 0.0626<br>(-0.007, 0.132)   | -0.085<br>(-0.188, 0.017)  | -0.022<br>(-0.106, 0.061)  | 0.00244              |
| 106 | Cardiac Dysrhythmias                                  | 44.56<br>(44.21, 44.91) | 0.67<br>(0.62, 0.73) | 0.0044<br>(0.0036, 0.0052)  | 0.0114<br>(-0.048, 0.071)   | -0.023<br>(-0.11, 0.064)   | -0.012<br>(-0.083, 0.059)  | 0.61037              |
| 107 | Cardiac Arrest and Ventricular Fibrillation           | 0.57<br>(0.53, 0.61)    | 0.64<br>(0.59, 0.69) | 0.0042<br>(0.0034, 0.0049)  | -0.023<br>(-0.078, 0.032)   | -0.129<br>(-0.21, -0.048)  | -0.152<br>(-0.217, -0.086) | 0                    |
| 108 | Congestive Heart Failure; Nonhypertensive             | 6.08<br>(5.95, 6.21)    | 0.67<br>(0.6, 0.74)  | 0.0041<br>(0.003, 0.0052)   | 0.0437<br>(-0.035, 0.123)   | 0.001<br>(-0.115, 0.117)   | 0.045<br>(-0.049, 0.139)   | 0.04204              |
| 109 | Acute Cerebrovascular Disease                         | 4.46<br>(4.35, 4.57)    | 0.63<br>(0.58, 0.69) | 0.0043<br>(0.0035, 0.0052)  | -0.1153<br>(-0.178, -0.053) | -0.03<br>(-0.121, 0.062)   | -0.145<br>(-0.219, -0.071) | 0                    |
| 110 | Occlusion or Stenosis of Precerebral Arteries         | 2.19<br>(2.11, 2.27)    | 0.52<br>(0.44, 0.59) | 0.0059<br>(0.0048, 0.007)   | -0.0144<br>(-0.096, 0.067)  | -0.100<br>(-0.22, 0.02)    | -0.115<br>(-0.212, -0.017) | 0.00019              |
| 111 | Other and Ill-Defined Cerebrovascular Disease         | 1.12<br>(1.06, 1.18)    | 0.62<br>(0.54, 0.7)  | 0.0043<br>(0.0031, 0.0055)  | 0.5614<br>(0.474, 0.649)    | -0.249<br>(-0.378, -0.12)  | 0.313<br>(0.208, 0.417)    | 0                    |
| 112 | Transient Cerebral Ischemia                           | 1.87<br>(1.8, 1.94)     | 0.78<br>(0.71, 0.84) | 0.0021<br>(0.0011, 0.0031)  | 0.0533<br>(-0.02, 0.126)    | -0.081<br>(-0.188, 0.027)  | -0.028<br>(-0.115, 0.06)   | 0.01122              |
| 113 | Late Effects of Cerebrovascular Disease               | 2.22<br>(2.14, 2.3)     | 0.77<br>(0.72, 0.83) | 0.0032<br>(0.0024, 0.004)   | -0.2658<br>(-0.326, -0.205) | -0.118<br>(-0.207, -0.029) | -0.383<br>(-0.456, -0.311) | 0                    |
| 114 | Peripheral and Visceral Atherosclerosis               | 5.64<br>(5.52, 5.76)    | 0.62<br>(0.55, 0.68) | 0.0044<br>(0.0034, 0.0054)  | -0.0573<br>(-0.133, 0.019)  | -0.113<br>(-0.225, -0.001) | -0.171<br>(-0.261, -0.08)  | 0                    |
| 115 | Aortic; Peripheral; and Visceral Artery Aneurysms     | 2.18<br>(2.1, 2.26)     | 0.4<br>(0.33, 0.47)  | 0.0079<br>(0.0069, 0.0089)  | 0.057<br>(-0.019, 0.133)    | 0.064<br>(-0.048, 0.175)   | 0.121<br>(0.03, 0.211)     | 0                    |
| 116 | Aortic and Peripheral Arterial Embolism or Thrombosis | 0.36<br>(0.33, 0.39)    | 0.86<br>(0.79, 0.93) | 0.0012<br>(0.0002, 0.0023)  | 0.0839<br>(0.007, 0.161)    | -0.065<br>(-0.178, 0.048)  | 0.019<br>(-0.073, 0.11)    | 0.00053              |
| 117 | Other Circulatory Disease                             | 39.1<br>(38.77, 39.43)  | 0.51<br>(0.44, 0.58) | 0.0068<br>(0.0058, 0.0078)  | -0.2884<br>(-0.364, -0.213) | 0.093<br>(-0.018, 0.204)   | -0.195<br>(-0.286, -0.105) | 0                    |
| 118 | Phlebitis; Thrombophlebitis and Thromboembolism       | 7.52<br>(7.38, 7.66)    | 0.67<br>(0.63, 0.72) | 0.0039<br>(0.0032, 0.0046)  | -0.0625<br>(-0.113, -0.012) | -0.103<br>(-0.178, -0.028) | -0.166<br>(-0.226, -0.105) | 0                    |
| CCS | Category label                                        | 9/15 Rate               | $\alpha$             | $\beta$                     | $\gamma$                    | $\delta$                   | $\gamma + \delta$          | F: $\gamma=\delta=0$ |

|     |                                                                                |                            |                       |                              |                             |                            |                            |         |
|-----|--------------------------------------------------------------------------------|----------------------------|-----------------------|------------------------------|-----------------------------|----------------------------|----------------------------|---------|
| 119 | Varicose Veins of Lower Extremity                                              | 7.89<br>(7.74, 8.04)       | 0.61<br>(0.55, 0.67)  | 0.0028<br>(0.0019, 0.0037)   | -0.0608<br>(-0.129, 0.007)  | -0.001<br>(-0.101, 0.098)  | -0.062<br>(-0.143, 0.019)  | 0.00039 |
| 120 | Hemorrhoids                                                                    | 18.13<br>(17.91, 18.35)    | 0.62<br>(0.56, 0.69)  | 0.0043<br>(0.0033, 0.0052)   | -0.0212<br>(-0.093, 0.051)  | -0.003<br>(-0.109, 0.102)  | -0.024<br>(-0.11, 0.061)   | 0.35853 |
| 121 | Other Diseases of Veins and Lymphatics                                         | 8.02<br>(7.87, 8.17)       | 0.44<br>(0.38, 0.51)  | 0.0056<br>(0.0046, 0.0066)   | 0.0722<br>(0, 0.144)        | -0.072<br>(-0.177, 0.034)  | 0.001<br>(-0.085, 0.087)   | 0.0016  |
| 122 | Pneumonia (Except That Caused by Tuberculosis or Sexually Transmitted Disease) | 9.81<br>(9.65, 9.97)       | 1.65<br>(1.5, 1.79)   | -0.0014<br>(-0.0036, 0.0008) | 0.2303<br>(0.066, 0.394)    | -0.213<br>(-0.454, 0.028)  | 0.017<br>(-0.178, 0.213)   | 0.00001 |
| 123 | Influenza                                                                      | 1.9<br>(1.83, 1.97)        | 12.67<br>(2.4, 22.95) | 0.1218<br>(-0.0312, 0.2748)  | -6.1925<br>(-17.587, 5.202) | 5.81<br>(-10.95, 22.57)    | -0.383<br>(-13.98, 13.21)  | 0.13742 |
| 124 | Acute and Chronic Tonsillitis                                                  | 13.18<br>(12.99, 13.37)    | 1.17<br>(1.07, 1.26)  | -0.0014<br>(-0.0028, 0)      | 0.1211<br>(0.016, 0.226)    | -0.02<br>(-0.174, 0.135)   | 0.102<br>(-0.024, 0.227)   | 0.00002 |
| 125 | Acute Bronchitis                                                               | 34.11<br>(33.81, 34.41)    | 2.13<br>(1.94, 2.33)  | -0.003<br>(-0.006, 0)        | -0.0091<br>(-0.23, 0.211)   | -0.048<br>(-0.372, 0.277)  | -0.057<br>(-0.32, 0.206)   | 0.7267  |
| 126 | Other Upper Respiratory Infections                                             | 277.73<br>(276.87, 278.59) | 1.33<br>(1.22, 1.45)  | 0.0013<br>(-0.0004, 0.003)   | 0.0009<br>(-0.123, 0.125)   | 0.005<br>(-0.178, 0.188)   | 0.006<br>(-0.142, 0.154)   | 0.98897 |
| 127 | Chronic Obstructive Pulmonary Disease and Bronchiectasis                       | 24.8<br>(24.54, 25.06)     | 1.11<br>(1.01, 1.22)  | 0.0037<br>(0.0021, 0.0052)   | 0.0169<br>(-0.099, 0.132)   | -0.219<br>(-0.389, -0.049) | -0.202<br>(-0.339, -0.064) | 0       |
| 128 | Asthma                                                                         | 68.56<br>(68.13, 68.99)    | 0.81<br>(0.75, 0.87)  | 0.0034<br>(0.0025, 0.0043)   | -0.0111<br>(-0.079, 0.057)  | -0.063<br>(-0.163, 0.037)  | -0.074<br>(-0.155, 0.007)  | 0.0047  |
| 129 | Aspiration Pneumonitis; Food/Vomitus                                           | 0.31<br>(0.28, 0.34)       | 0.55<br>(0.47, 0.64)  | 0.0048<br>(0.0035, 0.0061)   | 0.1879<br>(0.092, 0.284)    | -0.163<br>(-0.304, -0.022) | 0.024<br>(-0.09, 0.139)    | 0       |
| 130 | Pleurisy; Pneumothorax; Pulmonary Collapse                                     | 2.78<br>(2.69, 2.87)       | 0.86<br>(0.8, 0.92)   | 0.0031<br>(0.0022, 0.004)    | 0.0144<br>(-0.053, 0.082)   | -0.081<br>(-0.18, 0.018)   | -0.067<br>(-0.147, 0.013)  | 0.00617 |
| 131 | Respiratory Failure; Insufficiency; Arrest (Adult)                             | 2.85<br>(2.76, 2.94)       | 0.78<br>(0.71, 0.84)  | 0.0041<br>(0.0032, 0.0051)   | -0.0157<br>(-0.085, 0.054)  | -0.099<br>(-0.201, 0.004)  | -0.114<br>(-0.198, -0.031) | 0.00001 |
| 132 | Lung Disease Due to External Agents                                            | 0.91<br>(0.86, 0.96)       | 0.42<br>(0.11, 0.72)  | 0.0092<br>(0.0046, 0.0138)   | -0.5903<br>(-0.933, -0.248) | -0.340<br>(-0.843, 0.164)  | -0.930<br>(-1.338, -0.521) | 0       |
| 133 | Other Lower Respiratory Disease                                                | 104.87<br>(104.34, 105.4)  | 0.88<br>(0.75, 1.01)  | 0.0066<br>(0.0047, 0.0085)   | 0.0409<br>(-0.101, 0.183)   | -0.054<br>(-0.263, 0.155)  | -0.013<br>(-0.183, 0.156)  | 0.52412 |
| 134 | Other Upper Respiratory Disease                                                | 183.72<br>(183.02, 184.42) | 0.7<br>(0.64, 0.76)   | 0.0031<br>(0.0022, 0.004)    | 0.0116<br>(-0.054, 0.077)   | -0.064<br>(-0.16, 0.033)   | -0.052<br>(-0.13, 0.026)   | 0.03558 |

| CCS | Category label                                | 9/15 Rate               | $\alpha$             | $\beta$                     | $\gamma$                    | $\delta$                   | $\gamma + \delta$          | F: $\gamma=\delta=0$ |
|-----|-----------------------------------------------|-------------------------|----------------------|-----------------------------|-----------------------------|----------------------------|----------------------------|----------------------|
| 135 | Intestinal Infection                          | 6.69<br>(6.56, 6.82)    | 1.14<br>(1.01, 1.27) | 0.0026<br>(0.0007, 0.0045)  | 0.107<br>(-0.035, 0.249)    | 0.128<br>(-0.08, 0.337)    | 0.235<br>(0.066, 0.404)    | 0                    |
| 136 | Disorders of Teeth and Jaw                    | 12.25<br>(12.07, 12.43) | 0.74<br>(0.68, 0.81) | 0.0032<br>(0.0023, 0.0042)  | 0.0629<br>(-0.007, 0.133)   | -0.085<br>(-0.188, 0.019)  | -0.022<br>(-0.106, 0.062)  | 0.00266              |
| 137 | Diseases of Mouth; Excluding Dental           | 8.28<br>(8.13, 8.43)    | 0.61<br>(0.55, 0.67) | 0.005<br>(0.0041, 0.0059)   | 0.0265<br>(-0.041, 0.094)   | -0.040<br>(-0.139, 0.059)  | -0.013<br>(-0.094, 0.067)  | 0.26036              |
| 138 | Esophageal Disorders                          | 74.46<br>(74.01, 74.91) | 0.58<br>(0.51, 0.65) | 0.0059<br>(0.0049, 0.0069)  | 0.0265<br>(-0.049, 0.102)   | -0.096<br>(-0.207, 0.014)  | -0.07<br>(-0.159, 0.02)    | 0.00569              |
| 139 | Gastroduodenal Ulcer (Except Hemorrhage)      | 2.42<br>(2.34, 2.5)     | 0.7<br>(0.64, 0.76)  | 0.0032<br>(0.0022, 0.0041)  | 0.0553<br>(-0.015, 0.125)   | -0.054<br>(-0.157, 0.049)  | 0.001<br>(-0.082, 0.084)   | 0.0164               |
| 140 | Gastritis and Duodenitis                      | 13.13<br>(12.94, 13.32) | 0.81<br>(0.75, 0.86) | 0.0022<br>(0.0014, 0.003)   | 0.0115<br>(-0.049, 0.072)   | -0.061<br>(-0.149, 0.028)  | -0.049<br>(-0.121, 0.023)  | 0.02963              |
| 141 | Other Disorders of Stomach and Duodenum       | 9.22<br>(9.06, 9.38)    | 0.56<br>(0.5, 0.62)  | 0.0053<br>(0.0044, 0.0062)  | -0.1972<br>(-0.267, -0.128) | -0.143<br>(-0.245, -0.04)  | -0.340<br>(-0.423, -0.257) | 0                    |
| 142 | Appendicitis and Other Appendiceal Conditions | 1.53<br>(1.47, 1.59)    | 0.89<br>(0.85, 0.94) | -0.0004<br>(-0.001, 0.0003) | 0.006<br>(-0.044, 0.056)    | 0.014<br>(-0.06, 0.088)    | 0.02<br>(-0.04, 0.08)      | 0.43934              |
| 143 | Abdominal Hernia                              | 13.06<br>(12.87, 13.25) | 0.72<br>(0.67, 0.78) | 0.003<br>(0.0022, 0.0039)   | 0.0522<br>(-0.012, 0.116)   | -0.011<br>(-0.105, 0.084)  | 0.041<br>(-0.035, 0.118)   | 0.00397              |
| 144 | Regional Enteritis and Ulcerative Colitis     | 10.98<br>(10.81, 11.15) | 0.68<br>(0.63, 0.73) | 0.0041<br>(0.0034, 0.0048)  | 0.0332<br>(-0.021, 0.088)   | 0.028<br>(-0.052, 0.108)   | 0.061<br>(-0.004, 0.126)   | 0.0008               |
| 145 | Intestinal Obstruction Without Hernia         | 1.74<br>(1.67, 1.81)    | 0.8<br>(0.75, 0.84)  | 0.0031<br>(0.0024, 0.0037)  | -0.0576<br>(-0.106, -0.009) | -0.096<br>(-0.167, -0.026) | -0.154<br>(-0.212, -0.097) | 0                    |
| 146 | Diverticulosis and Diverticulitis             | 13.82<br>(13.63, 14.01) | 0.61<br>(0.55, 0.68) | 0.0039<br>(0.0029, 0.0049)  | 0.0251<br>(-0.048, 0.098)   | -0.027<br>(-0.134, 0.081)  | -0.001<br>(-0.089, 0.086)  | 0.43791              |
| 147 | Anal and Rectal Conditions                    | 7.67<br>(7.53, 7.81)    | 0.67<br>(0.61, 0.74) | 0.0037<br>(0.0028, 0.0046)  | 0.1374<br>(0.069, 0.206)    | -0.033<br>(-0.134, 0.068)  | 0.104<br>(0.022, 0.186)    | 0                    |
| 148 | Peritonitis and Intestinal Abscess            | 0.72<br>(0.68, 0.76)    | 0.54<br>(0.49, 0.59) | 0.0047<br>(0.0039, 0.0054)  | -0.0547<br>(-0.11, 0.001)   | -0.073<br>(-0.154, 0.009)  | -0.127<br>(-0.194, -0.061) | 0                    |
| 149 | Biliary Tract Disease                         | 6.71<br>(6.58, 6.84)    | 0.88<br>(0.83, 0.93) | 0.0005<br>(-0.0002, 0.0012) | 0.0156<br>(-0.038, 0.069)   | -0.002<br>(-0.081, 0.077)  | 0.014<br>(-0.05, 0.077)    | 0.44755              |

| CCS | Category label                                    | 9/15 Rate               | $\alpha$             | $\beta$                     | $\gamma$                    | $\delta$                   | $\gamma + \delta$          | F: $\gamma=\delta=0$ |
|-----|---------------------------------------------------|-------------------------|----------------------|-----------------------------|-----------------------------|----------------------------|----------------------------|----------------------|
| 151 | Other Liver Diseases                              | 17.46<br>(17.24, 17.68) | 0.5<br>(0.44, 0.57)  | 0.0063<br>(0.0053, 0.0073)  | -0.1312<br>(-0.205, -0.057) | 0.002<br>(-0.107, 0.111)   | -0.13<br>(-0.218, -0.041)  | 0                    |
| 152 | Pancreatic Disorders (not Diabetes)               | 2.69<br>(2.6, 2.78)     | 0.65<br>(0.6, 0.7)   | 0.0041<br>(0.0033, 0.0048)  | 0.0338<br>(-0.021, 0.089)   | -0.064<br>(-0.145, 0.017)  | -0.03<br>(-0.096, 0.036)   | 0.01414              |
| 153 | Gastrointestinal Hemorrhage                       | 12.93<br>(12.74, 13.12) | 0.94<br>(0.88, 1)    | 0.0004<br>(-0.0005, 0.0014) | -0.0063<br>(-0.075, 0.062)  | -0.031<br>(-0.132, 0.07)   | -0.038<br>(-0.119, 0.044)  | 0.23932              |
| 154 | Noninfectious Gastroenteritis                     | 11.71<br>(11.53, 11.89) | 1.16<br>(1.03, 1.29) | 0.002<br>(0.0001, 0.004)    | -0.0481<br>(-0.195, 0.099)  | 0.001<br>(-0.214, 0.217)   | -0.047<br>(-0.222, 0.128)  | 0.33342              |
| 155 | Other Gastrointestinal Disorders                  | 81.94<br>(81.47, 82.41) | 0.57<br>(0.51, 0.63) | 0.0055<br>(0.0046, 0.0063)  | 0.0665<br>(0, 0.133)        | -0.079<br>(-0.177, 0.018)  | -0.013<br>(-0.092, 0.066)  | 0.00106              |
| 156 | Nephritis; Nephrosis; Renal Sclerosis             | 1.85<br>(1.78, 1.92)    | 0.57<br>(0.5, 0.65)  | 0.0059<br>(0.0048, 0.007)   | -0.2463<br>(-0.328, -0.164) | -0.073<br>(-0.193, 0.047)  | -0.319<br>(-0.417, -0.222) | 0                    |
| 157 | Acute and Unspecified Renal Failure               | 3.74<br>(3.64, 3.84)    | 0.51<br>(0.45, 0.57) | 0.0057<br>(0.0048, 0.0066)  | 0.0204<br>(-0.048, 0.089)   | -0.09<br>(-0.191, 0.01)    | -0.07<br>(-0.152, 0.012)   | 0.00344              |
| 158 | Chronic Kidney Disease                            | 16.06<br>(15.85, 16.27) | 0.6<br>(0.54, 0.65)  | 0.0044<br>(0.0036, 0.0053)  | 0.0638<br>(0, 0.128)        | -0.089<br>(-0.183, 0.005)  | -0.025<br>(-0.102, 0.051)  | 0.00058              |
| 159 | Urinary Tract Infections                          | 44.94<br>(44.59, 45.29) | 0.76<br>(0.72, 0.8)  | 0.002<br>(0.0013, 0.0026)   | 0.0039<br>(-0.042, 0.05)    | -0.116<br>(-0.183, -0.048) | -0.112<br>(-0.167, -0.057) | 0                    |
| 160 | Calculus of Urinary Tract                         | 14.7<br>(14.5, 14.9)    | 0.67<br>(0.62, 0.71) | 0.0038<br>(0.0031, 0.0045)  | -0.0011<br>(-0.051, 0.048)  | -0.085<br>(-0.158, -0.012) | -0.086<br>(-0.145, -0.027) | 0                    |
| 161 | Other Diseases of Kidney and Ureters              | 9.04<br>(8.88, 9.2)     | 0.54<br>(0.48, 0.6)  | 0.0056<br>(0.0047, 0.0066)  | 0.0551<br>(-0.013, 0.124)   | 0.028<br>(-0.073, 0.129)   | 0.083<br>(0.001, 0.165)    | 0.00009              |
| 162 | Other Diseases of Bladder and Urethra             | 5.33<br>(5.21, 5.45)    | 0.67<br>(0.6, 0.74)  | 0.0036<br>(0.0026, 0.0046)  | 0.0276<br>(-0.05, 0.105)    | -0.064<br>(-0.178, 0.05)   | -0.036<br>(-0.128, 0.056)  | 0.12376              |
| 163 | Genitourinary Symptoms and Ill-Defined Conditions | 64.4<br>(63.98, 64.82)  | 0.53<br>(0.47, 0.58) | 0.0058<br>(0.0049, 0.0066)  | 0.0414<br>(-0.021, 0.104)   | -0.063<br>(-0.155, 0.03)   | -0.021<br>(-0.096, 0.054)  | 0.02526              |
| 164 | Hyperplasia of Prostate                           | 13.05<br>(12.86, 13.24) | 0.66<br>(0.59, 0.73) | 0.0044<br>(0.0033, 0.0054)  | 0.0161<br>(-0.062, 0.094)   | -0.076<br>(-0.19, 0.039)   | -0.06<br>(-0.152, 0.033)   | 0.03899              |
| 165 | Inflammatory Conditions of Male Genital Organs    | 5.14<br>(5.02, 5.26)    | 0.98<br>(0.93, 1.03) | 0.0001<br>(-0.0007, 0.0009) | 0.0189<br>(-0.041, 0.079)   | -0.104<br>(-0.193, -0.015) | -0.085<br>(-0.157, -0.013) | 0.00006              |
| 166 | Other Male Genital Disorders                      | 19.51<br>(19.28, 19.74) | 0.54<br>(0.48, 0.6)  | 0.0063<br>(0.0054, 0.0072)  | 0.0308<br>(-0.038, 0.1)     | -0.116<br>(-0.217, -0.015) | -0.085<br>(-0.167, -0.003) | 0.00019              |

| CCS | Category label                                | 9/15 Rate               | $\alpha$             | $\beta$                      | $\gamma$                    | $\delta$                   | $\gamma + \delta$          | F: $\gamma=\delta=0$ |
|-----|-----------------------------------------------|-------------------------|----------------------|------------------------------|-----------------------------|----------------------------|----------------------------|----------------------|
| 167 | Nonmalignant Breast Conditions                | 21.31<br>(21.07, 21.55) | 0.84<br>(0.78, 0.91) | 0.0019<br>(0.0009, 0.0029)   | -0.0697<br>(-0.143, 0.004)  | -0.051<br>(-0.159, 0.057)  | -0.121<br>(-0.208, -0.033) | 0                    |
| 168 | Inflammatory Diseases of Female Pelvic Organs | 19.7<br>(19.47, 19.93)  | 0.84<br>(0.79, 0.9)  | 0.0017<br>(0.0009, 0.0025)   | -0.0172<br>(-0.077, 0.043)  | -0.068<br>(-0.157, 0.021)  | -0.085<br>(-0.157, -0.013) | 0.00016              |
| 169 | Endometriosis                                 | 3.14<br>(3.05, 3.23)    | 0.7<br>(0.64, 0.76)  | 0.0032<br>(0.0022, 0.0041)   | 0.0481<br>(-0.023, 0.119)   | -0.046<br>(-0.151, 0.058)  | 0.002<br>(-0.083, 0.087)   | 0.04787              |
| 170 | Prolapse of Female Genital Organs             | 3.11<br>(3.02, 3.2)     | 0.76<br>(0.69, 0.83) | 0.0016<br>(0.0006, 0.0026)   | 0.1136<br>(0.038, 0.189)    | 0.006<br>(-0.105, 0.118)   | 0.12<br>(0.03, 0.21)       | 0                    |
| 171 | Menstrual Disorders                           | 42.83<br>(42.49, 43.17) | 0.8<br>(0.74, 0.86)  | 0.0023<br>(0.0015, 0.0032)   | -0.0832<br>(-0.148, -0.018) | -0.055<br>(-0.15, 0.041)   | -0.138<br>(-0.215, -0.06)  | 0                    |
| 172 | Ovarian Cyst                                  | 7.68<br>(7.54, 7.82)    | 0.65<br>(0.59, 0.71) | 0.0043<br>(0.0034, 0.0051)   | -0.0524<br>(-0.115, 0.01)   | -0.168<br>(-0.26, -0.076)  | -0.22<br>(-0.295, -0.146)  | 0                    |
| 173 | Menopausal Disorders                          | 24.87<br>(24.61, 25.13) | 0.57<br>(0.5, 0.64)  | 0.0043<br>(0.0033, 0.0053)   | 0.0269<br>(-0.048, 0.102)   | -0.151<br>(-0.262, -0.041) | -0.124<br>(-0.214, -0.035) | 0                    |
| 174 | Female Infertility                            | 4.92<br>(4.8, 5.04)     | 0.88<br>(0.84, 0.93) | 0.0005<br>(-0.0001, 0.0012)  | 0.0454<br>(-0.006, 0.097)   | 0<br>(-0.076, 0.076)       | 0.045<br>(-0.016, 0.107)   | 0.00055              |
| 175 | Other Female Genital Disorders                | 39.82<br>(39.49, 40.15) | 0.7<br>(0.65, 0.76)  | 0.0031<br>(0.0022, 0.0039)   | -0.0841<br>(-0.147, -0.021) | -0.034<br>(-0.127, 0.059)  | -0.118<br>(-0.193, -0.042) | 0                    |
| 176 | Contraceptive and Procreative Management      | 48.37<br>(48.01, 48.73) | 0.53<br>(0.47, 0.58) | 0.0068<br>(0.006, 0.0076)    | -0.0572<br>(-0.12, 0.005)   | 0.005<br>(-0.087, 0.097)   | -0.053<br>(-0.127, 0.022)  | 0.00054              |
| 177 | Spontaneous Abortion                          | 1.16<br>(1.1, 1.22)     | 0.96<br>(0.9, 1.01)  | 0.001<br>(0.0002, 0.0019)    | 0.0639<br>(-0.001, 0.129)   | -0.003<br>(-0.098, 0.092)  | 0.061<br>(-0.016, 0.138)   | 0.00014              |
| 178 | Induced Abortion                              | 0.48<br>(0.44, 0.52)    | 1.09<br>(1.02, 1.15) | 0.0006<br>(-0.0004, 0.0015)  | -0.4602<br>(-0.532, -       | -0.084<br>(-0.19, 0.021)   | -0.544<br>(-0.63, -0.459)  | 0                    |
| 179 | Postabortion Complications                    | 0.03<br>(0.02, 0.04)    | 1.26<br>(1.03, 1.49) | -0.0008<br>(-0.0043, 0.0026) | -0.0296<br>(-0.286, 0.227)  | -0.460<br>(-0.837, -0.082) | -0.489<br>(-0.795, -0.183) | 0                    |
| 180 | Ectopic Pregnancy                             | 0.33<br>(0.3, 0.36)     | 0.89<br>(0.82, 0.95) | 0.0016<br>(0.0006, 0.0025)   | -0.0087<br>(-0.083, 0.066)  | -0.240<br>(-0.349, -0.13)  | -0.248<br>(-0.337, -0.16)  | 0                    |
| 181 | Other Complications of Pregnancy              | 11.45<br>(11.27, 11.63) | 0.61<br>(0.57, 0.66) | 0.0052<br>(0.0045, 0.0059)   | 0.6659<br>(0.613,           | 0.032<br>(-0.046, 0.109)   | 0.697<br>(0.634, 0.761)    | 0                    |

| CCS | Category label                                                                               | 9/15 Rate               | $\alpha$             | $\beta$                       | $\gamma$                    | $\delta$                   | $\gamma + \delta$          | F: $\gamma=\delta=0$ |
|-----|----------------------------------------------------------------------------------------------|-------------------------|----------------------|-------------------------------|-----------------------------|----------------------------|----------------------------|----------------------|
| 182 | Hemorrhage During Pregnancy; Abruptio Placenta; Placenta Previa                              | 2.92<br>(2.83, 3.01)    | 0.89<br>(0.85, 0.92) | 0.002<br>(0.0014, 0.0025)     | -0.037<br>(-0.076, 0.002)   | -0.027<br>(-0.085, 0.031)  | -0.064<br>(-0.111, -0.017) | 0                    |
| 183 | Hypertension Complicating Pregnancy; Childbirth and the Puerperium                           | 2.22<br>(2.14, 2.3)     | 0.63<br>(0.58, 0.68) | 0.0041<br>(0.0033, 0.0048)    | 0.0026<br>(-0.056, 0.061)   | 0.059<br>(-0.027, 0.145)   | 0.062<br>(-0.008, 0.132)   | 0.00661              |
| 184 | Early or Threatened Labor                                                                    | 2.57<br>(2.49, 2.65)    | 0.91<br>(0.85, 0.96) | 0.0001<br>(-0.0007, 0.0009)   | -0.0876<br>(-0.149, -0.026) | -0.051<br>(-0.142, 0.041)  | -0.138<br>(-0.212, -0.064) | 0                    |
| 185 | Prolonged Pregnancy                                                                          | 1.04<br>(0.99, 1.09)    | 0.5<br>(0.44, 0.56)  | 0.0046<br>(0.0038, 0.0055)    | 0.005<br>(-0.058, 0.068)    | 0.022<br>(-0.071, 0.115)   | 0.027<br>(-0.048, 0.102)   | 0.41602              |
| 186 | Diabetes or Abnormal Glucose Tolerance Complicating Pregnancy; Childbirth; or the Puerperium | 2.45<br>(2.37, 2.53)    | 0.65<br>(0.61, 0.69) | 0.0033<br>(0.0026, 0.0039)    | 0.067<br>(0.02, 0.114)      | 0.100<br>(0.031, 0.169)    | 0.167<br>(0.111, 0.223)    | 0                    |
| 187 | Malposition; Malpresentation                                                                 | 0.81<br>(0.76, 0.86)    | 0.74<br>(0.69, 0.8)  | 0.0029<br>(0.0021, 0.0037)    | -0.0408<br>(-0.101, 0.02)   | -0.032<br>(-0.121, 0.057)  | -0.073<br>(-0.145, -0.001) | 0.00024              |
| 188 | Fetopelvic Disproportion; Obstruction                                                        | 0.55<br>(0.51, 0.59)    | 1.04<br>(0.96, 1.11) | -0.0019<br>(-0.0031, -0.0008) | -0.0078<br>(-0.094, 0.078)  | -0.163<br>(-0.289, -0.037) | -0.171<br>(-0.273, -0.068) | 0                    |
| 189 | Previous C-Section                                                                           | 2.64<br>(2.56, 2.72)    | 0.65<br>(0.6, 0.7)   | 0.0029<br>(0.0022, 0.0036)    | 0.0057<br>(-0.045, 0.057)   | -0.13<br>(-0.205, -0.055)  | -0.124<br>(-0.185, -0.063) | 0                    |
| 190 | Fetal Distress and Abnormal Forces of Labor                                                  | 1.19<br>(1.13, 1.25)    | 0.77<br>(0.72, 0.82) | 0.0015<br>(0.0007, 0.0022)    | -0.0412<br>(-0.097, 0.014)  | 0.086<br>(0.005, 0.168)    | 0.045<br>(-0.021, 0.112)   | 0.00078              |
| 191 | Polyhydramnios and Other Problems of Amniotic Cavity                                         | 1.35<br>(1.29, 1.41)    | 0.52<br>(0.47, 0.57) | 0.0048<br>(0.004, 0.0055)     | 0.0056<br>(-0.05, 0.061)    | 0.090<br>(0.008, 0.171)    | 0.095<br>(0.029, 0.161)    | 0                    |
| 192 | Umbilical Cord Complication                                                                  | 0.81<br>(0.76, 0.86)    | 0.36<br>(0.29, 0.44) | 0.0067<br>(0.0055, 0.0079)    | -0.0535<br>(-0.14, 0.033)   | 0.074<br>(-0.053, 0.201)   | 0.021<br>(-0.082, 0.124)   | 0.0491               |
| 193 | OB-Related Trauma to Perineum and Vulva                                                      | 1.86<br>(1.79, 1.93)    | 0.47<br>(0.41, 0.52) | 0.0053<br>(0.0045, 0.0062)    | 0.0489<br>(-0.014, 0.111)   | 0.024<br>(-0.068, 0.116)   | 0.073<br>(-0.001, 0.148)   | 0.00016              |
| 194 | Forceps Delivery                                                                             | 0.19<br>(0.17, 0.21)    | 0.85<br>(0.76, 0.94) | 0.0015<br>(0.0002, 0.0028)    | -0.1067<br>(-0.206, -0.007) | -0.125<br>(-0.272, 0.021)  | -0.232<br>(-0.351, -0.113) | 0                    |
| 195 | Other Complications of Birth; Puerperium Affecting Management of Mother                      | 14.64<br>(14.44, 14.84) | 0.76<br>(0.72, 0.79) | 0.0026<br>(0.0021, 0.0031)    | -0.5877<br>(-0.626, -0.55)  | -0.036<br>(-0.092, 0.02)   | -0.624<br>(-0.669, -0.578) | 0                    |



| CCS | Category label                                                                                             | 9/15 Rate                  | $\alpha$             | $\beta$                    | $\gamma$                    | $\delta$                   | $\gamma + \delta$          | F: $\gamma=\delta=0$ |
|-----|------------------------------------------------------------------------------------------------------------|----------------------------|----------------------|----------------------------|-----------------------------|----------------------------|----------------------------|----------------------|
| 196 | Other Pregnancy and Delivery Including Normal                                                              | 23.04<br>(22.79, 23.29)    | 0.74<br>(0.7, 0.78)  | 0.0032<br>(0.0026, 0.0037) | 0.0269<br>(-0.015, 0.069)   | -0.103<br>(-0.164, -0.041) | -0.076<br>(-0.126, -0.026) | 0                    |
| 197 | Skin and Subcutaneous Tissue Infections                                                                    | 44.03<br>(43.68, 44.38)    | 0.69<br>(0.65, 0.73) | 0.0012<br>(0.0006, 0.0018) | -0.0093<br>(-0.053, 0.034)  | -0.005<br>(-0.07, 0.059)   | -0.015<br>(-0.067, 0.038)  | 0.46975              |
| 198 | Other Inflammatory Condition of Skin                                                                       | 44.03<br>(43.68, 44.38)    | 0.59<br>(0.52, 0.65) | 0.0048<br>(0.0038, 0.0058) | 0.0973<br>(0.025, 0.169)    | 0.064<br>(-0.042, 0.17)    | 0.162<br>(0.076, 0.247)    | 0                    |
| 199 | Chronic Ulcer of Skin                                                                                      | 5.3<br>(5.18, 5.42)        | 0.7<br>(0.65, 0.75)  | 0.003<br>(0.0023, 0.0038)  | -0.0649<br>(-0.121, -0.008) | -0.025<br>(-0.108, 0.058)  | -0.09<br>(-0.158, -0.023)  | 0                    |
| 200 | Other Skin Disorders                                                                                       | 177.62<br>(176.93, 178.31) | 0.66<br>(0.6, 0.72)  | 0.0036<br>(0.0027, 0.0045) | 0.0627<br>(-0.004, 0.13)    | -0.016<br>(-0.114, 0.083)  | 0.047<br>(-0.033, 0.127)   | 0.00087              |
| 201 | Infective Arthritis and Osteomyelitis (Except That Caused by Tuberculosis or Sexually Transmitted Disease) | 1.81<br>(1.74, 1.88)       | 0.7<br>(0.65, 0.75)  | 0.0031<br>(0.0023, 0.0038) | 0.0336<br>(-0.023, 0.09)    | -0.067<br>(-0.149, 0.016)  | -0.033<br>(-0.1, 0.034)    | 0.0121               |
| 202 | Rheumatoid Arthritis and Related Disease                                                                   | 16.38<br>(16.17, 16.59)    | 0.75<br>(0.7, 0.8)   | 0.0028<br>(0.0021, 0.0036) | 0.0256<br>(-0.031, 0.082)   | -0.090<br>(-0.173, -0.006) | -0.064<br>(-0.132, 0.004)  | 0.00052              |
| 203 | Osteoarthritis                                                                                             | 56.72<br>(56.33, 57.11)    | 0.63<br>(0.57, 0.69) | 0.0043<br>(0.0034, 0.0052) | 0.0475<br>(-0.02, 0.115)    | -0.043<br>(-0.143, 0.056)  | 0.004<br>(-0.076, 0.085)   | 0.03831              |
| 204 | Other Non-Traumatic Joint Disorders                                                                        | 192.93<br>(192.21, 193.65) | 0.54<br>(0.49, 0.59) | 0.0054<br>(0.0047, 0.0061) | -0.0784<br>(-0.131, -0.026) | -0.043<br>(-0.12, 0.035)   | -0.121<br>(-0.184, -0.058) | 0                    |
| 205 | Spondylosis; Intervertebral Disc Disorders; Other Back Problems                                            | 310.69<br>(309.79, 311.59) | 0.69<br>(0.64, 0.75) | 0.0035<br>(0.0027, 0.0042) | 0.0375<br>(-0.02, 0.095)    | -0.065<br>(-0.15, 0.02)    | -0.027<br>(-0.096, 0.042)  | 0.01519              |
| 206 | Osteoporosis                                                                                               | 6.18<br>(6.05, 6.31)       | 0.7<br>(0.62, 0.78)  | 0.0028<br>(0.0016, 0.004)  | 0.0119<br>(-0.078, 0.102)   | -0.032<br>(-0.164, 0.101)  | -0.02<br>(-0.127, 0.087)   | 0.67293              |
| 207 | Pathological Fracture                                                                                      | 2.17<br>(2.09, 2.25)       | 0.56<br>(0.51, 0.62) | 0.0037<br>(0.0028, 0.0045) | -0.6488<br>(-0.714, -0.584) | -0.105<br>(-0.201, -0.009) | -0.754<br>(-0.832, -0.676) | 0                    |
| 208 | Acquired Foot Deformities                                                                                  | 16.6<br>(16.39, 16.81)     | 0.62<br>(0.56, 0.68) | 0.0035<br>(0.0026, 0.0044) | 0.0003<br>(-0.067, 0.067)   | -0.045<br>(-0.143, 0.054)  | -0.044<br>(-0.124, 0.036)  | 0.12512              |
| 209 | Other Acquired Deformities                                                                                 | 12.21<br>(12.03, 12.39)    | 0.55<br>(0.47, 0.64) | 0.0047<br>(0.0035, 0.006)  | 0.5162<br>(0.422, 0.61)     | 0.075<br>(-0.064, 0.213)   | 0.591<br>(0.478, 0.703)    | 0                    |

| CCS | Category label                                                  | 9/15 Rate                  | $\alpha$             | $\beta$                      | $\gamma$                    | $\delta$                   | $\gamma + \delta$          | F: $\gamma=\delta=0$ |
|-----|-----------------------------------------------------------------|----------------------------|----------------------|------------------------------|-----------------------------|----------------------------|----------------------------|----------------------|
| 210 | Systemic Lupus Erythematosus and Connective Tissue Disorders    | 8.23<br>(8.08, 8.38)       | 0.62<br>(0.57, 0.67) | 0.0047<br>(0.0039, 0.0054)   | 0.0879<br>(0.029, 0.147)    | -0.043<br>(-0.131, 0.044)  | 0.044<br>(-0.026, 0.115)   | 0                    |
| 211 | Other Connective Tissue Disease                                 | 270.78<br>(269.93, 271.63) | 0.57<br>(0.51, 0.63) | 0.0048<br>(0.0039, 0.0056)   | -0.0358<br>(-0.1, 0.028)    | -0.09<br>(-0.184, 0.005)   | -0.126<br>(-0.202, -0.049) | 0                    |
| 212 | Other Bone Disease and Musculoskeletal Deformities              | 144.45<br>(143.83, 145.07) | 0.8<br>(0.73, 0.86)  | 0.0024<br>(0.0014, 0.0033)   | 0.0045<br>(-0.067, 0.076)   | -0.023<br>(-0.127, 0.082)  | -0.018<br>(-0.103, 0.067)  | 0.69529              |
| 213 | Cardiac and Circulatory Congenital Anomalies                    | 5.5<br>(5.38, 5.62)        | 0.69<br>(0.63, 0.74) | 0.0036<br>(0.0027, 0.0044)   | 0.0399<br>(-0.022, 0.102)   | 0.019<br>(-0.072, 0.111)   | 0.059<br>(-0.015, 0.133)   | 0.00239              |
| 214 | Digestive Congenital Anomalies                                  | 2.01<br>(1.94, 2.08)       | 0.48<br>(0.41, 0.54) | 0.0061<br>(0.0052, 0.0071)   | -0.0226<br>(-0.094, 0.048)  | 0.015<br>(-0.089, 0.12)    | -0.008<br>(-0.092, 0.077)  | 0.49309              |
| 215 | Genitourinary Congenital Anomalies                              | 4.1<br>(3.99, 4.21)        | 0.55<br>(0.49, 0.61) | 0.0047<br>(0.0038, 0.0056)   | -0.0046<br>(-0.071, 0.062)  | -0.159<br>(-0.257, -0.061) | -0.164<br>(-0.243, -0.084) | 0                    |
| 216 | Nervous System Congenital Anomalies                             | 1.42<br>(1.36, 1.48)       | 0.61<br>(0.55, 0.67) | 0.0048<br>(0.0039, 0.0057)   | 0.272<br>(0.204, 0.34)      | -0.039<br>(-0.14, 0.061)   | 0.232<br>(0.151, 0.314)    | 0                    |
| 217 | Other Congenital Anomalies                                      | 19.71<br>(19.48, 19.94)    | 0.58<br>(0.52, 0.64) | 0.0046<br>(0.0037, 0.0055)   | -0.1161<br>(-0.183, -0.049) | -0.021<br>(-0.12, 0.077)   | -0.138<br>(-0.217, -0.058) | 0                    |
| 218 | Liveborn                                                        | 7.4<br>(7.26, 7.54)        | 0.95<br>(0.91, 1)    | -0.0013<br>(-0.002, -0.0006) | -0.0083<br>(-0.059, 0.042)  | 0.033<br>(-0.042, 0.107)   | 0.024<br>(-0.036, 0.085)   | 0.25127              |
| 219 | Short Gestation; Low Birth Weight; and Fetal Growth Retardation | 1.69<br>(1.62, 1.76)       | 0.9<br>(0.83, 0.97)  | 0.0018<br>(0.0007, 0.0029)   | -0.0772<br>(-0.158, 0.004)  | 0.251<br>(0.131, 0.37)     | 0.173<br>(0.077, 0.27)     | 0                    |
| 220 | Intrauterine Hypoxia and Birth Asphyxia                         | 0.18<br>(0.16, 0.2)        | 0.75<br>(0.65, 0.85) | 0.0031<br>(0.0016, 0.0045)   | -0.4536<br>(-0.561, -0.346) | 0.112<br>(-0.047, 0.27)    | -0.342<br>(-0.471, -0.214) | 0                    |
| 221 | Respiratory Distress Syndrome                                   | 0.31<br>(0.28, 0.34)       | 0.77<br>(0.69, 0.85) | 0.0014<br>(0.0002, 0.0025)   | -0.0267<br>(-0.114, 0.06)   | -0.06<br>(-0.188, 0.067)   | -0.087<br>(-0.191, 0.017)  | 0.00772              |
| 222 | Hemolytic Jaundice and Perinatal Jaundice                       | 2.54<br>(2.46, 2.62)       | 0.74<br>(0.68, 0.81) | 0.0019<br>(0.0009, 0.0029)   | 0.0839<br>(0.007, 0.161)    | 0.003<br>(-0.11, 0.116)    | 0.087<br>(-0.004, 0.179)   | 0.00001              |
| 223 | Birth Trauma                                                    | 0.19<br>(0.17, 0.21)       | 0.6<br>(0.48, 0.71)  | 0.0035<br>(0.0017, 0.0053)   | 0.1409<br>(0.01, 0.272)     | 0.251<br>(0.058, 0.444)    | 0.392<br>(0.235, 0.548)    | 0                    |
| 224 | Other Perinatal Conditions                                      | 8.8<br>(8.65, 8.95)        | 0.74<br>(0.7, 0.78)  | 0.0021<br>(0.0015, 0.0027)   | 0.0622<br>(0.015, 0.11)     | 0.029<br>(-0.041, 0.099)   | 0.092<br>(0.035, 0.148)    | 0                    |

| CCS | Category label                                       | 9/15 Rate               | $\alpha$             | $\beta$                       | $\gamma$                    | $\delta$                   | $\gamma + \delta$          | F: $\gamma=\delta=0$ |
|-----|------------------------------------------------------|-------------------------|----------------------|-------------------------------|-----------------------------|----------------------------|----------------------------|----------------------|
| 225 | Joint Disorders and Dislocations; Trauma-Related     | 37.86<br>(37.54, 38.18) | 1.2<br>(1.14, 1.26)  | -0.0035<br>(-0.0044, -0.0026) | -0.0946<br>(-0.159, -0.03)  | 0.043<br>(-0.051, 0.138)   | -0.051<br>(-0.128, 0.025)  | 0                    |
| 226 | Fracture of Neck of Femur (hip)                      | 0.46<br>(0.42, 0.5)     | 0.79<br>(0.72, 0.86) | 0.0018<br>(0.0008, 0.0028)    | 0.1431<br>(0.067, 0.219)    | 0.07<br>(-0.041, 0.182)    | 0.213<br>(0.123, 0.304)    | 0                    |
| 227 | Spinal Cord Injury                                   | 0.37<br>(0.34, 0.4)     | 0.68<br>(0.62, 0.74) | 0.0029<br>(0.0021, 0.0038)    | -0.1959<br>(-0.262, -0.13)  | -0.079<br>(-0.176, 0.019)  | -0.274<br>(-0.353, -0.196) | 0                    |
| 228 | Skull and Face Fractures                             | 1.28<br>(1.22, 1.34)    | 0.91<br>(0.86, 0.97) | -0.0004<br>(-0.0013, 0.0005)  | 0.0222<br>(-0.043, 0.087)   | 0.085<br>(-0.011, 0.18)    | 0.107<br>(0.03, 0.184)     | 0.00001              |
| 229 | Fracture of Upper Limb                               | 16.64<br>(16.43, 16.85) | 0.76<br>(0.72, 0.79) | 0<br>(-0.0005, 0.0005)        | 0.0209<br>(-0.018, 0.06)    | 0.004<br>(-0.053, 0.061)   | 0.025<br>(-0.021, 0.071)   | 0.03158              |
| 230 | Fracture of Lower Limb                               | 13.87<br>(13.68, 14.06) | 0.72<br>(0.68, 0.76) | 0.001<br>(0.0004, 0.0015)     | 0.1165<br>(0.074, 0.159)    | 0.017<br>(-0.046, 0.08)    | 0.133<br>(0.082, 0.184)    | 0                    |
| 231 | Other Fractures                                      | 5.02<br>(4.9, 5.14)     | 0.64<br>(0.6, 0.68)  | 0.0031<br>(0.0026, 0.0037)    | -0.1888<br>(-0.231, -0.146) | -0.075<br>(-0.138, -0.013) | -0.264<br>(-0.315, -0.213) | 0                    |
| 232 | Sprains and Strains                                  | 99.18<br>(98.66, 99.7)  | 0.84<br>(0.79, 0.88) | 0.0011<br>(0.0004, 0.0018)    | -0.1542<br>(-0.205, -0.104) | -0.056<br>(-0.13, 0.019)   | -0.210<br>(-0.271, -0.15)  | 0                    |
| 233 | Intracranial Injury                                  | 6.86<br>(6.72, 7)       | 0.51<br>(0.44, 0.58) | 0.0055<br>(0.0045, 0.0066)    | -0.0634<br>(-0.141, 0.014)  | -0.107<br>(-0.222, 0.007)  | -0.171<br>(-0.264, -0.078) | 0                    |
| 234 | Crushing Injury or Internal Injury                   | 1.56<br>(1.49, 1.63)    | 0.75<br>(0.69, 0.8)  | 0.0006<br>(-0.0002, 0.0015)   | 0.0036<br>(-0.059, 0.066)   | -0.055<br>(-0.148, 0.037)  | -0.052<br>(-0.127, 0.023)  | 0.03897              |
| 235 | Open Wounds of Head; Neck; and Trunk                 | 9.87<br>(9.71, 10.03)   | 0.81<br>(0.78, 0.84) | 0.0008<br>(0.0003, 0.0013)    | -0.2206<br>(-0.259, -0.182) | -0.023<br>(-0.079, 0.034)  | -0.244<br>(-0.289, -0.198) | 0                    |
| 236 | Open Wounds of Extremities                           | 13.44<br>(13.25, 13.63) | 0.7<br>(0.66, 0.75)  | -0.0002<br>(-0.0009, 0.0004)  | 0.0295<br>(-0.017, 0.076)   | 0.046<br>(-0.023, 0.114)   | 0.075<br>(0.02, 0.13)      | 0.00000              |
| 237 | Complication of Device; Implant or Graft             | 6.31<br>(6.18, 6.44)    | 0.69<br>(0.64, 0.74) | 0.0031<br>(0.0023, 0.0038)    | -0.0039<br>(-0.06, 0.052)   | -0.017<br>(-0.099, 0.066)  | -0.021<br>(-0.088, 0.046)  | 0.51705              |
| 238 | Complications of Surgical Procedures or Medical Care | 7.96<br>(7.81, 8.11)    | 0.66<br>(0.6, 0.73)  | 0.0034<br>(0.0025, 0.0043)    | 0.5494<br>(0.482, 0.617)    | 0.065<br>(-0.034, 0.165)   | 0.614<br>(0.534, 0.695)    | 0                    |

| CCS | Category label                                                        | 9/15 Rate               | $\alpha$             | $\beta$                     | $\gamma$                    | $\delta$                   | $\gamma + \delta$          | F: $\gamma=\delta=0$ |
|-----|-----------------------------------------------------------------------|-------------------------|----------------------|-----------------------------|-----------------------------|----------------------------|----------------------------|----------------------|
| 239 | Superficial Injury; Contusion                                         | 42.34<br>(42, 42.68)    | 0.56<br>(0.5, 0.62)  | 0.0014<br>(0.0005, 0.0023)  | -0.1091<br>(-0.175, -0.043) | -0.042<br>(-0.139, 0.055)  | -0.151<br>(-0.23, -0.073)  | 0                    |
| 240 | Burns                                                                 | 2.32<br>(2.24, 2.4)     | 0.72<br>(0.67, 0.77) | 0.0003<br>(-0.0004, 0.0011) | 0.004<br>(-0.051, 0.059)    | -0.019<br>(-0.1, 0.062)    | -0.015<br>(-0.08, 0.051)   | 0.65859              |
| 241 | Poisoning by Psychotropic Agents                                      | 0.34<br>(0.31, 0.37)    | 0.76<br>(0.69, 0.84) | 0.0017<br>(0.0006, 0.0028)  | -0.4971<br>(-0.58, -0.415)  | -0.073<br>(-0.194, 0.049)  | -0.57<br>(-0.668, -0.471)  | 0                    |
| 242 | Poisoning by Other Medications and Drugs                              | 3.96<br>(3.86, 4.06)    | 0.83<br>(0.78, 0.88) | 0.0027<br>(0.0019, 0.0035)  | -0.7927<br>(-0.853, -0.733) | -0.06<br>(-0.148, 0.028)   | -0.853<br>(-0.925, -0.782) | 0                    |
| 243 | Poisoning by Nonmedicinal Substances                                  | 4.22<br>(4.11, 4.33)    | 0.26<br>(0.17, 0.35) | 0.0026<br>(0.0012, 0.0039)  | -0.0122<br>(-0.115, 0.09)   | 0.001<br>(-0.149, 0.152)   | -0.011<br>(-0.133, 0.111)  | 0.87056              |
| 244 | Other Injuries and Conditions Due to External Causes                  | 33.45<br>(33.15, 33.75) | 0.56<br>(0.51, 0.6)  | 0.0038<br>(0.0031, 0.0045)  | 0.1857<br>(0.134, 0.238)    | -0.135<br>(-0.212, -0.059) | 0.05<br>(-0.012, 0.112)    | 0                    |
| 245 | Syncope                                                               | 9.62<br>(9.46, 9.78)    | 0.77<br>(0.72, 0.81) | 0.0029<br>(0.0023, 0.0036)  | -0.016<br>(-0.066, 0.034)   | -0.043<br>(-0.117, 0.031)  | -0.059<br>(-0.119, 0.001)  | 0.00156              |
| 246 | Fever of Unknown Origin                                               | 30.41<br>(30.12, 30.7)  | 0.98<br>(0.62, 1.35) | 0.009<br>(0.0036, 0.0144)   | -0.1207<br>(-0.522, 0.281)  | 0.036<br>(-0.555, 0.626)   | -0.085<br>(-0.564, 0.394)  | 0.46828              |
| 247 | Lymphadenitis                                                         | 9.34<br>(9.18, 9.5)     | 0.79<br>(0.73, 0.86) | 0.0037<br>(0.0027, 0.0046)  | 0.0075<br>(-0.065, 0.08)    | -0.094<br>(-0.201, 0.012)  | -0.087<br>(-0.173, 0)      | 0.00132              |
| 248 | Gangrene                                                              | 0.23<br>(0.21, 0.25)    | 0.87<br>(0.78, 0.96) | 0.0033<br>(0.002, 0.0046)   | 0.023<br>(-0.076, 0.122)    | 0.120<br>(-0.025, 0.265)   | 0.143<br>(0.025, 0.261)    | 0.00011              |
| 249 | Shock                                                                 | 0.47<br>(0.43, 0.51)    | 0.65<br>(0.58, 0.72) | 0.0056<br>(0.0045, 0.0066)  | -0.0442<br>(-0.12, 0.031)   | -0.017<br>(-0.128, 0.094)  | -0.061<br>(-0.151, 0.029)  | 0.0089               |
| 250 | Nausea and Vomiting                                                   | 35.9<br>(35.59, 36.21)  | 0.61<br>(0.54, 0.68) | 0.0072<br>(0.0062, 0.0083)  | 0.0054<br>(-0.074, 0.085)   | -0.104<br>(-0.221, 0.013)  | -0.098<br>(-0.193, -0.003) | 0.00096              |
| 251 | Abdominal Pain                                                        | 81.23<br>(80.76, 81.7)  | 0.8<br>(0.75, 0.85)  | 0.0025<br>(0.0018, 0.0033)  | 0.1314<br>(0.075, 0.188)    | -0.045<br>(-0.128, 0.039)  | 0.087<br>(0.019, 0.154)    | 0                    |
| 252 | Malaise and Fatigue                                                   | 57.86<br>(57.46, 58.26) | 0.58<br>(0.51, 0.64) | 0.0052<br>(0.0043, 0.0061)  | -0.0274<br>(-0.096, 0.041)  | -0.069<br>(-0.17, 0.033)   | -0.096<br>(-0.178, -0.014) | 0.00014              |
| 253 | Allergic Reactions                                                    | 95.25<br>(94.74, 95.76) | 0.61<br>(0.56, 0.67) | 0.0038<br>(0.0029, 0.0046)  | -0.0138<br>(-0.076, 0.048)  | -0.030<br>(-0.12, 0.061)   | -0.043<br>(-0.117, 0.03)   | 0.08363              |
| 254 | Rehabilitation Care; Fitting of Prostheses; and Adjustment of Devices | 21.07<br>(20.83, 21.31) | 0.68<br>(0.63, 0.73) | 0.0032<br>(0.0024, 0.004)   | -0.9133<br>(-0.973, -0.854) | -0.079<br>(-0.166, 0.009)  | -0.992<br>(-1.063, -0.921) | 0                    |

| CCS | Category label                                                                        | 9/15 Rate                  | $\alpha$             | $\beta$                    | $\gamma$                    | $\delta$                   | $\gamma + \delta$          | F: $\gamma=\delta=0$ |
|-----|---------------------------------------------------------------------------------------|----------------------------|----------------------|----------------------------|-----------------------------|----------------------------|----------------------------|----------------------|
| 255 | Administrative/Social Admission                                                       | 205.14<br>(204.4, 205.88)  | 0.69<br>(0.58, 0.8)  | 0.0018<br>(0.0002, 0.0035) | -0.6761<br>(-0.797, -0.555) | 0.018<br>(-0.159, 0.196)   | -0.658<br>(-0.802, -0.514) | 0                    |
| 256 | Medical Examination/Evaluation                                                        | 296.86<br>(295.98, 297.74) | 0.72<br>(0.61, 0.82) | 0.0027<br>(0.0012, 0.0043) | 0.5352<br>(0.42, 0.651)     | 0.061<br>(-0.109, 0.231)   | 0.597<br>(0.459, 0.735)    | 0                    |
| 257 | Other Aftercare                                                                       | 85.62<br>(85.14, 86.1)     | 0.39<br>(0.32, 0.46) | 0.0079<br>(0.0068, 0.0089) | 0.1497<br>(0.071, 0.229)    | 0.025<br>(-0.091, 0.141)   | 0.175<br>(0.081, 0.269)    | 0                    |
| 258 | Other Screening for Suspected Conditions (Not Mental Disorders or Infectious Disease) | 103.24<br>(102.71, 103.77) | 0.34<br>(0.26, 0.42) | 0.0076<br>(0.0064, 0.0088) | 0.5338<br>(0.444, 0.623)    | 0.174<br>(0.042, 0.306)    | 0.708<br>(0.601, 0.815)    | 0                    |
| 259 | Residual Codes; Unclassified                                                          | 192.87<br>(192.15, 193.59) | 0.35<br>(0.24, 0.46) | 0.0079<br>(0.0062, 0.0096) | 0.2882<br>(0.163, 0.414)    | 0.06<br>(-0.124, 0.245)    | 0.348<br>(0.199, 0.498)    | 0                    |
| 650 | Adjustment Disorders                                                                  | 59.3<br>(58.9, 59.7)       | 0.92<br>(0.88, 0.97) | 0.001<br>(0.0003, 0.0016)  | -0.0858<br>(-0.134, -0.037) | 0.209<br>(0.138, 0.28)     | 0.123<br>(0.065, 0.181)    | 0                    |
| 651 | Anxiety Disorders                                                                     | 162.86<br>(162.2, 163.52)  | 0.42<br>(0.37, 0.47) | 0.0077<br>(0.007, 0.0084)  | 0.02<br>(-0.033, 0.073)     | 0.056<br>(-0.022, 0.133)   | 0.076<br>(0.013, 0.138)    | 0.0001               |
| 652 | Attention-Deficit Conduct and Disruptive Behavior Disorders                           | 78.56<br>(78.1, 79.02)     | 0.5<br>(0.45, 0.55)  | 0.007<br>(0.0063, 0.0077)  | -0.0183<br>(-0.07, 0.034)   | -0.153<br>(-0.23, -0.077)  | -0.172<br>(-0.234, -0.11)  | 0                    |
| 653 | Delirium Dementia and Amnesic and Other Cognitive Disorders                           | 3.49<br>(3.39, 3.59)       | 0.49<br>(0.43, 0.55) | 0.0065<br>(0.0056, 0.0074) | -0.1984<br>(-0.264, -0.133) | -0.126<br>(-0.223, -0.03)  | -0.325<br>(-0.403, -0.246) | 0                    |
| 654 | Developmental Disorders                                                               | 14.18<br>(13.98, 14.38)    | 0.43<br>(0.38, 0.48) | 0.0074<br>(0.0066, 0.0081) | -0.0107<br>(-0.069, 0.048)  | 0.066<br>(-0.02, 0.152)    | 0.056<br>(-0.014, 0.125)   | 0.01025              |
| 656 | Impulse Control Disorders NEC                                                         | 1.69<br>(1.62, 1.76)       | 0.63<br>(0.59, 0.67) | 0.0055<br>(0.0049, 0.0061) | -0.073<br>(-0.118, -0.028)  | -0.073<br>(-0.138, -0.007) | -0.146<br>(-0.199, -0.092) | 0                    |
| 657 | Mood Disorders                                                                        | 165.94<br>(165.27, 166.61) | 0.8<br>(0.76, 0.84)  | 0.0026<br>(0.0021, 0.0032) | -0.0829<br>(-0.125, -0.041) | 0.034<br>(-0.027, 0.096)   | -0.049<br>(-0.099, 0.001)  | 0                    |
| 658 | Personality Disorders                                                                 | 2.88<br>(2.79, 2.97)       | 0.47<br>(0.42, 0.53) | 0.0065<br>(0.0057, 0.0073) | -0.1025<br>(-0.165, -0.04)  | -0.086<br>(-0.178, 0.005)  | -0.189<br>(-0.263, -0.114) | 0                    |
| 659 | Schizophrenia and Other Psychotic Disorders                                           | 4.38<br>(4.27, 4.49)       | 0.73<br>(0.69, 0.76) | 0.004<br>(0.0034, 0.0045)  | -0.1642<br>(-0.207, -0.122) | -0.073<br>(-0.136, -0.011) | -0.238<br>(-0.288, -0.187) | 0                    |
| 660 | Alcohol-Related Disorders                                                             | 11.31<br>(11.13, 11.49)    | 0.5<br>(0.47, 0.53)  | 0.0062<br>(0.0058, 0.0067) | -0.0222<br>(-0.058, 0.013)  | 0.014<br>(-0.039, 0.066)   | -0.009<br>(-0.051, 0.034)  | 0.06622              |
| 661 | Substance-Related Disorders                                                           | 15.95<br>(15.74, 16.16)    | 0.41<br>(0.33, 0.49) | 0.0085<br>(0.0073, 0.0097) | 1.151<br>(1.061, 1.241)     | 0.388<br>(0.255, 0.52)     | 1.539<br>(1.432, 1.646)    | 0                    |

| CCS  | Category label                                                   | 9/15 Rate               | $\alpha$               | $\beta$                     | $\gamma$                    | $\delta$                   | $\gamma + \delta$          | F: $\gamma=\delta=0$ |
|------|------------------------------------------------------------------|-------------------------|------------------------|-----------------------------|-----------------------------|----------------------------|----------------------------|----------------------|
| 662  | Suicide and Intentional Self-Inflicted Injury                    | 1.65<br>(1.58, 1.72)    | 0.3<br>(0.22, 0.39)    | 0.0089<br>(0.0076, 0.0102)  | 0.208<br>(0.113, 0.303)     | 0.203<br>(0.063, 0.343)    | 0.411<br>(0.297, 0.524)    | 0                    |
| 663  | Screening and History of Mental Health and Substance Abuse Codes | 47.9<br>(47.54, 48.26)  | 0.27<br>(0.2, 0.34)    | 0.0094<br>(0.0083, 0.0104)  | -0.696<br>(-0.774, -0.618)  | -0.147<br>(-0.262, -0.032) | -0.843<br>(-0.937, -0.75)  | 0                    |
| 670  | Miscellaneous Mental Health Disorders                            | 21.87<br>(21.63, 22.11) | 0.52<br>(0.46, 0.57)   | 0.0054<br>(0.0046, 0.0062)  | -0.0911<br>(-0.151, -0.032) | 0.123<br>(0.035, 0.211)    | 0.032<br>(-0.039, 0.103)   | 0                    |
| 2601 | External Cause Codes: Cut/Pierce                                 | 2.04<br>(1.97, 2.11)    | 0.36<br>(0.27, 0.46)   | 0.0056<br>(0.0042, 0.007)   | -0.0092<br>(-0.113, 0.095)  | -0.148<br>(-0.301, 0.005)  | -0.157<br>(-0.281, -0.033) | 0.00006              |
| 2602 | External Cause Codes: Drowning/Submersion                        | 0.01<br>(0, 0.02)       | -0.05<br>(-0.53, 0.43) | 0.0066<br>(-0.0005, 0.0137) | 0.209<br>(-0.322, 0.739)    | -0.974<br>(-1.754, -0.194) | -0.765<br>(-1.398, -0.133) | 0.00003              |
| 2603 | External Cause Codes: Fall                                       | 7.95<br>(7.8, 8.1)      | 0.47<br>(0.36, 0.58)   | 0.007<br>(0.0054, 0.0087)   | 0.1889<br>(0.065, 0.312)    | -0.281<br>(-0.462, -0.099) | -0.092<br>(-0.239, 0.056)  | 0                    |
| 2604 | External Cause Codes: Fire/Burn                                  | 0.32<br>(0.29, 0.35)    | 0.34<br>(0.23, 0.45)   | 0.0067<br>(0.0051, 0.0083)  | 0.074<br>(-0.046, 0.194)    | -0.305<br>(-0.482, -0.128) | -0.231<br>(-0.374, -0.088) | 0                    |
| 2605 | External Cause Codes: Firearm                                    | 0.07<br>(0.06, 0.08)    | 0.3<br>(0.18, 0.43)    | 0.0096<br>(0.0077, 0.0114)  | 0.219<br>(0.083, 0.355)     | 0.022<br>(-0.178, 0.223)   | 0.241<br>(0.079, 0.404)    | 0                    |
| 2606 | External Cause Codes: Machinery                                  | 0.09<br>(0.07, 0.11)    | 0.32<br>(0.17, 0.48)   | 0.0052<br>(0.003, 0.0075)   | 0.732<br>(0.565, 0.9)       | -0.643<br>(-0.89, -0.396)  | 0.089<br>(-0.111, 0.289)   | 0                    |
| 2607 | External Cause Codes: Motor Vehicle Traffic (MVT)                | 3.51<br>(3.41, 3.61)    | 0.28<br>(0.21, 0.35)   | 0.0074<br>(0.0064, 0.0084)  | 0.136<br>(0.059, 0.212)     | -0.081<br>(-0.194, 0.031)  | 0.054<br>(-0.037, 0.145)   | 0                    |
| 2608 | External Cause Codes: Pedal Cyclist; Not MVT                     | 0.48<br>(0.44, 0.52)    | 0.04<br>(-0.08, 0.15)  | 0.0043<br>(0.0025, 0.006)   | -0.0778<br>(-0.207, 0.051)  | -0.094<br>(-0.284, 0.097)  | -0.171<br>(-0.325, -0.017) | 0.00012              |
| 2609 | External Cause Codes: Pedestrian; Not MVT                        | 0.03<br>(0.02, 0.04)    | 0.23<br>(-0.01, 0.46)  | 0.0038<br>(0.0003, 0.0073)  | 0.804<br>(0.545, 1.064)     | -0.107<br>(-0.489, 0.275)  | 0.697<br>(0.388, 1.007)    | 0                    |
| 2610 | External Cause Codes: Transport; Not MVT                         | 0.57<br>(0.53, 0.61)    | 0.06<br>(-0.34, 0.47)  | 0.0052<br>(-0.0008, 0.0113) | 1.132<br>(0.682, 1.581)     | -1.244<br>(-1.905, -0.583) | -0.112<br>(-0.648, 0.424)  | 0                    |
| 2611 | External Cause Codes: Natural/Environment                        | 4.87<br>(4.75, 4.99)    | -0.19<br>(-0.49, 0.11) | 0.0091<br>(0.0047, 0.0136)  | 0.906<br>(0.574, 1.237)     | 0.518<br>(0.031, 1.006)    | 1.424<br>(1.029, 1.819)    | 0                    |
| 2612 | External Cause Codes: Overexertion                               | 2.31<br>(2.23, 2.39)    | 0.47<br>(0.36, 0.59)   | 0.0065<br>(0.0048, 0.0082)  | -0.823<br>(-0.949, -0.696)  | -0.235<br>(-0.421, -0.049) | -1.058<br>(-1.209, -0.907) | 0                    |

| CCS  | Category label                                                                                             | 9/15 Rate            | $\alpha$              | $\beta$                    | $\gamma$                   | $\delta$                   | $\gamma + \delta$          | F: $\gamma=\delta=0$ |
|------|------------------------------------------------------------------------------------------------------------|----------------------|-----------------------|----------------------------|----------------------------|----------------------------|----------------------------|----------------------|
| 2613 | External Cause Codes: Poisoning                                                                            | 0.62<br>(0.58, 0.66) | 0.19<br>(0.04, 0.34)  | 0.0087<br>(0.0066, 0.0107) | -0.770<br>(-1.023, -0.517) | -0.497<br>(-1.993, 0.999)  | -1.267<br>(-2.572, 0.039)  | 0                    |
| 2614 | External Cause Codes: Struck by; Against                                                                   | 4.51<br>(4.4, 4.62)  | 0.32<br>(0.24, 0.41)  | 0.0049<br>(0.0036, 0.0062) | 0.133<br>(0.038, 0.227)    | -0.155<br>(-0.293, -0.016) | -0.022<br>(-0.134, 0.091)  | 0                    |
| 2616 | Adverse Effects of Medical Care                                                                            | 0.4<br>(0.37, 0.43)  | 0.43<br>(0.3, 0.56)   | 0.0074<br>(0.0055, 0.0093) | -0.244<br>(-0.386, -0.102) | -0.408<br>(-0.617, -0.199) | -0.653<br>(-0.822, -0.483) | 0                    |
| 2617 | Adverse Effects of Medical Drugs                                                                           | 1.33<br>(1.27, 1.39) | 0.39<br>(0.27, 0.51)  | 0.0066<br>(0.0048, 0.0084) | 1.606<br>(1.47, 1.742)     | 0.232<br>(0.031, 0.432)    | 1.837<br>(1.675, 2)        | 0                    |
| 2618 | External Cause Codes: Other Specified and Classifiable                                                     | 1.54<br>(1.48, 1.6)  | 0.28<br>(0.17, 0.39)  | 0.0065<br>(0.0049, 0.0081) | -0.328<br>(-0.445, -0.211) | -0.182<br>(-0.355, -0.01)  | -0.511<br>(-0.65, -0.371)  | 0                    |
| 2619 | External Cause Codes: Other Specified; NEC                                                                 | 1.54<br>(1.48, 1.6)  | 0.09<br>(-0.03, 0.21) | 0.0086<br>(0.0069, 0.0104) | -0.656<br>(-0.787, -0.526) | -0.297<br>(-0.489, -0.105) | -0.953<br>(-1.109, -0.797) | 0                    |
| 2620 | External Cause Codes: Unspecified                                                                          | 6.54<br>(6.41, 6.67) | 0.39<br>(0.29, 0.49)  | 0.0044<br>(0.0029, 0.0058) | 0.519<br>(0.41, 0.628)     | -0.398<br>(-0.558, -0.237) | 0.121<br>(-0.009, 0.252)   | 0                    |
| 2621 | External Cause Codes: Place of Occurrence                                                                  | 7.29<br>(7.15, 7.43) | 0.38<br>(0.3, 0.47)   | 0.0049<br>(0.0036, 0.0061) | 0.161<br>(0.067, 0.255)    | -0.319<br>(-0.457, -0.181) | -0.158<br>(-0.27, -0.046)  | 0                    |
| ALL  | # of categories (out of 282), where coefficients are statistically significant (that is, $P < 0.05/282$ )  |                      | 275                   | 249                        | 107                        | 77                         | 145                        | 164                  |
| ALL  | # of categories with coefficients that are statistically significant and large (that is, $\geq \pm 20\%$ ) |                      | -                     | -                          | 46                         | 27                         | 61                         | -                    |
